# Supplementary material for: Effects of lifelong testosterone exposure on health and disease using Mendelian randomization
Source: eLife. 2020 Oct 16;9:e58914. doi: 10.7554/eLife.58914 (PMC7591257; doi:10.7554/eLife.58914)
Supplement: Figure 2—source data 1. [file elife-58914-fig2-data1.xlsx]

## Sheet: S8
Figure 2 - Source Data 1. Associations of genetically-predicted calculated free testosterone for 439 health outcomes across the human phenome.
Trait	Effect per 0.1 nmol/L increase CFT (95% CI)	P-value	FDR-adjusted p-value	Sample Size	Number of Cases	Number of Controls	Phecode (if applicable)	Category
Creatinine	0.113 (0.079 to 0.146)	4.783e-11	2.1093e-08	149849	NA	NA	NA	biomarker
C-reactive protein	-0.085 (-0.119 to -0.052)	6.145e-07	0.000135497	149547	NA	NA	NA	biomarker
Spinal stenosis	OR=2.03 (1.51 to 2.75)	3.818e-06	0.000561246	152836	1917	150919	phecode 720	musculoskeletal
Apolipoprotein A	-0.018 (-0.026 to -0.01)	1.553e-05	0.00171218	138185	NA	NA	NA	biomarker
HDL cholesterol	-0.074 (-0.109 to -0.039)	3.619e-05	0.00319196	138394	NA	NA	NA	biomarker
Essential hypertension	OR=1.17 (1.08 to 1.27)	7.534e-05	0.00553749	156766	40809	115957	phecode 401.1	circulatory system
Hypertension	OR=1.17 (1.08 to 1.26)	0.0001053	0.0066339	156917	40960	115957	phecode 401	circulatory system
Umbilical hernia	OR=1.64 (1.27 to 2.13)	0.0001635	0.00901294	132863	2624	130239	phecode 550.4	digestive
Sleep apnea	OR=1.56 (1.23 to 1.98)	0.0002087	0.0100283	156734	3124	153610	phecode 327.3	neurological
Degenerative skin conditions and other dermatoses	OR=0.61 (0.47 to 0.79)	0.0002274	0.0100283	155651	2584	153067	phecode 702	dermatologic
IGF1	0.333 (0.153 to 0.513)	0.0002814	0.0112816	149151	NA	NA	NA	biomarker
Unspecified monoarthritis	OR=1.29 (1.12 to 1.48)	0.0003249	0.0119401	147634	9832	137802	phecode 716.2	musculoskeletal
Phosphate	-0.01 (-0.016 to -0.005)	0.0003641	0.0122863	138207	NA	NA	NA	biomarker
Inguinal hernia	OR=1.24 (1.1 to 1.39)	0.0003937	0.0122863	144145	13906	130239	phecode 550.1	digestive
Abdominal hernia	OR=1.17 (1.07 to 1.28)	0.0004179	0.0122863	157211	26972	130239	phecode 550	digestive
Total protein	-0.235 (-0.376 to -0.095)	0.001054	0.027342	138299	NA	NA	NA	biomarker
Inflammatory diseases of prostate	OR=1.56 (1.19 to 2.03)	0.00108	0.027342	44293	2695	41598	phecode 601	genitourinary
Intestinal obstruction without mention of hernia	OR=1.66 (1.22 to 2.25)	0.001167	0.027342	127446	1884	125562	phecode 560	digestive
Allergyoradverse effect of penicillin	OR=1.34 (1.12 to 1.6)	0.001187	0.027342	152298	5686	146612	phecode 960.2	injuries and poisonings
GERD	OR=1.24 (1.09 to 1.42)	0.001261	0.027342	147762	10877	136885	phecode 530.11	digestive
Spondylosis and allied disorders	OR=1.46 (1.16 to 1.84)	0.001302	0.027342	154215	3296	150919	phecode 721	musculoskeletal
Sleep disorders	OR=1.43 (1.15 to 1.78)	0.001501	0.0300882	157211	3601	153610	phecode 327	neurological
Symptoms involving head and neck	OR=1.67 (1.21 to 2.29)	0.001683	0.0319725	157211	1709	155502	phecode 293	mental disorders
Total bilirubin	0.054 (0.02 to 0.088)	0.00174	0.0319725	149300	NA	NA	NA	biomarker
Alkaline phosphatase	-0.054 (-0.087 to -0.02)	0.001867	0.0329339	149937	NA	NA	NA	biomarker
Seborrheic keratosis	OR=0.58 (0.41 to 0.82)	0.00212	0.0359585	156046	1419	154627	phecode 702.2	dermatologic
Other symptoms involving abdomen and pelvis	OR=1.69 (1.2 to 2.38)	0.002508	0.040964	147838	1496	146342	phecode 579	digestive
Back pain	OR=1.31 (1.1 to 1.56)	0.002764	0.043533	157211	5797	151414	phecode 760	symptoms
Albumin	-0.133 (-0.221 to -0.044)	0.003263	0.0477245	138474	NA	NA	NA	biomarker
Calcium	-0.005 (-0.008 to -0.002)	0.003374	0.0477245	138426	NA	NA	NA	biomarker
Internal derangement of knee	OR=1.25 (1.08 to 1.46)	0.003391	0.0477245	156183	7941	148242	phecode 835	injuries and poisonings
Lipoma	OR=1.42 (1.12 to 1.79)	0.003463	0.0477245	156819	3221	153598	phecode 214	neoplasms
Poisoning by antibiotics	OR=1.29 (1.08 to 1.52)	0.003874	0.0517707	152812	6200	146612	phecode 960	injuries and poisonings
Prostatitis	OR=1.68 (1.18 to 2.4)	0.004129	0.0528723	43064	1466	41598	phecode 601.1	genitourinary
Obstructive chronic bronchitis	OR=1.32 (1.09 to 1.6)	0.004339	0.0528723	147942	5003	142939	phecode 496.21	respiratory
Cancer; suspected or other	OR=1.19 (1.06 to 1.34)	0.004374	0.0528723	151649	13842	137807	phecode 195	neoplasms
Chronic bronchitis	OR=1.32 (1.09 to 1.59)	0.004436	0.0528723	148033	5094	142939	phecode 496.2	respiratory
Arthropathy NOS	OR=1.17 (1.05 to 1.3)	0.004752	0.0551482	155282	17480	137802	phecode 716.9	musculoskeletal
Contracture of palmar fascia Dupuytrens disease	OR=0.69 (0.53 to 0.9)	0.005754	0.0634852	145632	2606	143026	phecode 728.71	musculoskeletal
Fasciitis	OR=0.7 (0.54 to 0.9)	0.006022	0.0634852	145804	2778	143026	phecode 728.7	musculoskeletal
Other arthropathies	OR=1.16 (1.04 to 1.29)	0.006187	0.0634852	155325	17523	137802	phecode 716	musculoskeletal
Other peripheral nerve disorders	OR=1.35 (1.09 to 1.68)	0.006308	0.0634852	154804	3798	151006	phecode 351	neurological
Osteoarthrosis	OR=1.19 (1.05 to 1.36)	0.006361	0.0634852	157211	11721	145490	phecode 740	musculoskeletal
Nonrheumatic mitral valve disorders	OR=0.65 (0.48 to 0.89)	0.006489	0.0634852	150859	1859	149000	phecode 395.1	circulatory system
Hypercholesterolemia	OR=1.15 (1.04 to 1.28)	0.006691	0.0634852	155658	19758	135900	phecode 272.11	endocrine metabolic
Mitral valve disease	OR=0.66 (0.48 to 0.89)	0.00673	0.0634852	150902	1902	149000	phecode 394.2	circulatory system
Delirium dementia and amnestic and other cognitive disorders	OR=1.57 (1.13 to 2.17)	0.006766	0.0634852	154523	1652	152871	phecode 290	mental disorders
Malignant neoplasm; other	OR=1.18 (1.04 to 1.33)	0.008178	0.0738	151312	13505	137807	phecode 195.1	neoplasms
Gout	OR=1.38 (1.09 to 1.75)	0.0082	0.0738	156915	3131	153784	phecode 274.1	endocrine metabolic
Gout and other crystal arthropathies	OR=1.35 (1.08 to 1.69)	0.00959	0.0845838	157211	3427	153784	phecode 274	endocrine metabolic
Chronic airway obstruction	OR=1.25 (1.05 to 1.49)	0.01118	0.0966741	148957	6018	142939	phecode 496	respiratory
Convulsions	OR=1.6 (1.1 to 2.33)	0.01442	0.121438	148322	1219	147103	phecode 345.3	neurological
Direct bilirubin	0.043 (0.009 to 0.078)	0.01472	0.121438	139800	NA	NA	NA	biomarker
Spondylosis without myelopathy	OR=1.43 (1.07 to 1.91)	0.01487	0.121438	153008	2089	150919	phecode 721.1	musculoskeletal
Respiratory abnormalities	OR=1.27 (1.05 to 1.54)	0.01573	0.126126	157211	4784	152427	phecode 513	respiratory
Cholesterol	-0.046 (-0.083 to -0.008)	0.01716	0.135135	149940	NA	NA	NA	biomarker
Gastrointestinal hemorrhage	OR=1.18 (1.03 to 1.36)	0.0176	0.136168	156012	9670	146342	phecode 578	digestive
Osteoarthritis; localized	OR=1.21 (1.03 to 1.41)	0.01849	0.140588	152917	7427	145490	phecode 740.1	musculoskeletal
Hyperlipidemia	OR=1.13 (1.02 to 1.24)	0.01885	0.140896	157148	21248	135900	phecode 272.1	endocrine metabolic
Lipoma of skin and subcutaneous tissue	OR=1.4 (1.05 to 1.87)	0.02013	0.147046	155732	2134	153598	phecode 214.1	neoplasms
Other acute and subacute forms of ischemic heart disease	OR=1.56 (1.07 to 2.28)	0.02037	0.147046	137463	1221	136242	phecode 411.9	circulatory system
Disorders of muscle; ligament; and fascia	OR=0.75 (0.59 to 0.96)	0.02102	0.147046	146118	3092	143026	phecode 728	musculoskeletal
Urinary tract infection	OR=1.24 (1.03 to 1.49)	0.02111	0.147046	149462	5313	144149	phecode 591	genitourinary
Personal history of diseases of digestive system	OR=1.19 (1.03 to 1.39)	0.02134	0.147046	133795	8233	125562	phecode 564.9	digestive
Disorders of lipoid metabolism	OR=1.12 (1.02 to 1.24)	0.02302	0.156182	157211	21311	135900	phecode 272	endocrine metabolic
Other intestinal obstruction	OR=1.48 (1.05 to 2.08)	0.02494	0.166645	127050	1488	125562	phecode 560.4	digestive
Anxiety disorder	OR=1.34 (1.04 to 1.72)	0.02533	0.166724	138279	2725	135554	phecode 300.1	mental disorders
Postoperative infection	OR=1.39 (1.04 to 1.87)	0.02621	0.16998	156723	2028	154695	phecode 080	infectious diseases
Esophagitis; GERD and related diseases	OR=1.13 (1.01 to 1.27)	0.02939	0.186835	152090	15205	136885	phecode 530.1	digestive
Gamma glutamyltransferase	0.037 (0.004 to 0.071)	0.02985	0.186835	149840	NA	NA	NA	biomarker
Other symptomsordisorders or the urinary system	OR=1.15 (1.01 to 1.3)	0.03008	0.186835	157211	12410	144801	phecode 599	genitourinary
Intestinal infection	OR=1.24 (1.02 to 1.52)	0.03113	0.190671	157211	4483	152728	phecode 008	infectious diseases
Actinic keratosis	OR=0.67 (0.46 to 0.97)	0.03196	0.193073	155924	1297	154627	phecode 702.1	dermatologic
Anxiety disorders	OR=1.3 (1.02 to 1.65)	0.03307	0.19538	138570	3016	135554	phecode 300	mental disorders
Chronic dermatitis due to solar radiation	OR=0.68 (0.47 to 0.97)	0.03361	0.19538	155541	1353	154188	phecode 938.2	dermatologic
Other disorders of prostate	OR=1.53 (1.03 to 2.27)	0.03379	0.19538	42816	1218	41598	phecode 602	genitourinary
Osteoporosis	OR=0.64 (0.42 to 0.97)	0.03478	0.19538	156733	1004	155729	phecode 743.1	musculoskeletal
Osteoporosis NOS	OR=0.64 (0.42 to 0.97)	0.03478	0.19538	156733	1004	155729	phecode 743.11	musculoskeletal
Asthma	OR=1.16 (1.01 to 1.33)	0.035	0.19538	152957	10018	142939	phecode 495	respiratory
Fracture of lower limb	OR=0.76 (0.59 to 0.98)	0.03638	0.200545	151628	2688	148940	phecode 800	injuries and poisonings
Sciatica	OR=1.58 (1.03 to 2.43)	0.03708	0.20188	156502	934	155568	phecode 764	symptoms
Other inflammatory spondylopathies	OR=1.55 (1.03 to 2.33)	0.03764	0.20243	157211	1022	156189	phecode 715	musculoskeletal
Poisoning by primarily systemic agents	OR=1.53 (1.02 to 2.29)	0.04007	0.211072	147670	1058	146612	phecode 963	injuries and poisonings
Dermatitis due to solar radiation	OR=0.69 (0.49 to 0.99)	0.04128	0.211072	155587	1399	154188	phecode 938	dermatologic
Urinary obstruction	OR=1.4 (1.01 to 1.95)	0.04143	0.211072	146437	1636	144801	phecode 599.1	genitourinary
Peritoneal adhesions postoperative postinfection	OR=1.48 (1.01 to 2.15)	0.04155	0.211072	143200	1234	141966	phecode 568.1	digestive
Hypothyroidism NOS	OR=1.31 (1.01 to 1.7)	0.04164	0.211072	156567	2588	153979	phecode 244.4	endocrine metabolic
Other diseases of respiratory system; not elsewhere classified	OR=1.21 (1.01 to 1.46)	0.04232	0.212081	157211	5112	152099	phecode 519	respiratory
Other disorders of urethra and urinary tract	OR=1.35 (1.01 to 1.8)	0.04332	0.214653	151230	2091	149139	phecode 597	genitourinary
Fracture of unspecified part of femur	OR=0.64 (0.41 to 0.99)	0.04569	0.223881	149838	898	148940	phecode 800.2	injuries and poisonings
Septal DeviationsorTurbinate Hypertrophy	OR=1.31 (1 to 1.7)	0.0466	0.22536	150593	2536	148057	phecode 470	respiratory
Right bundle branch block	OR=0.68 (0.47 to 1)	0.04761	0.22536	141247	1236	140011	phecode 426.31	circulatory system
Functional digestive disorders	OR=1.13 (1 to 1.27)	0.04803	0.22536	139238	13676	125562	phecode 564	digestive
Erythematous conditions	OR=1.56 (1 to 2.43)	0.04884	0.22536	155296	881	154415	phecode 695	dermatologic
Alanine aminotransferase	0.033 (0 to 0.067)	0.049	0.22536	149830	NA	NA	NA	biomarker
E coli	OR=1.46 (1 to 2.14)	0.04971	0.22536	150693	1204	149489	phecode 041.4	infectious diseases
Degeneration of macula and posterior pole of retina	OR=1.51 (1 to 2.28)	0.05008	0.22536	94875	1053	93822	phecode 362.2	sense organs
Macular degeneration senile of retina NOS	OR=1.51 (1 to 2.28)	0.05008	0.22536	94875	1053	93822	phecode 362.29	sense organs
Other disorders of peritoneum	OR=1.43 (1 to 2.06)	0.05222	0.232616	143289	1323	141966	phecode 568	digestive
Altered mental status	OR=1.4 (1 to 1.97)	0.05319	0.234568	154362	1491	152871	phecode 292.4	mental disorders
Diseases of the oral soft tissues; excluding lesions specific for gingiva and tongue	OR=1.36 (0.99 to 1.87)	0.05469	0.238795	156503	1744	154759	phecode 528	digestive
Diseases of esophagus	OR=1.11 (1 to 1.24)	0.05657	0.244582	153704	16819	136885	phecode 530	digestive
Peripheral vascular disease; unspecified	OR=1.33 (0.98 to 1.8)	0.06683	0.286136	153464	1889	151575	phecode 443.9	circulatory system
Secondary malignancy of bone	OR=1.4 (0.97 to 2.01)	0.06859	0.290598	139152	1345	137807	phecode 198.6	neoplasms
Other disorders of eyelids	OR=1.29 (0.98 to 1.7)	0.06919	0.290598	155466	2335	153131	phecode 374	sense organs
Diaphragmatic hernia	OR=1.13 (0.99 to 1.28)	0.0708	0.291262	141891	11652	130239	phecode 550.2	digestive
Other diseases of respiratory system; NEC	OR=1.19 (0.98 to 1.45)	0.07124	0.291262	156921	4822	152099	phecode 519.8	respiratory
Nonspecific chest pain	OR=1.11 (0.99 to 1.25)	0.07139	0.291262	157211	14178	143033	phecode 418	circulatory system
Hemiplegia	OR=0.67 (0.43 to 1.04)	0.07199	0.291262	148019	916	147103	phecode 342	neurological
Hypothyroidism	OR=1.26 (0.98 to 1.62)	0.07603	0.304811	156694	2715	153979	phecode 244	endocrine metabolic
Other mental disorder	OR=1.1 (0.99 to 1.22)	0.07921	0.310344	154074	18520	135554	phecode 306	mental disorders
Synovitis and tenosynovitis	OR=1.3 (0.97 to 1.73)	0.07921	0.310344	145109	2083	143026	phecode 727.1	musculoskeletal
Hemorrhoids	OR=1.13 (0.99 to 1.29)	0.08113	0.310344	151566	10293	141273	phecode 455	circulatory system
Hydronephrosis	OR=1.39 (0.96 to 2.02)	0.08139	0.310344	153509	1254	152255	phecode 595	genitourinary
Anal and rectal conditions	OR=1.15 (0.98 to 1.33)	0.08147	0.310344	149752	7786	141966	phecode 565	digestive
Otitis media and Eustachian tube disorders	OR=1.46 (0.95 to 2.23)	0.08206	0.310344	156494	954	155540	phecode 381	sense organs
Osteoarthrosis; localized; primary	OR=1.21 (0.98 to 1.51)	0.08299	0.310344	149212	3722	145490	phecode 740.11	musculoskeletal
Noninfectious gastroenteritis	OR=1.18 (0.98 to 1.41)	0.08304	0.310344	130942	5380	125562	phecode 558	digestive
Diseases of pancreas	OR=1.37 (0.96 to 1.96)	0.08416	0.311383	157211	1360	155851	phecode 577	digestive
Other biliary tract disease	OR=1.35 (0.96 to 1.88)	0.08473	0.311383	153390	1530	151860	phecode 575	digestive
Symptoms involving digestive system	OR=1.17 (0.98 to 1.39)	0.09114	0.332171	131291	5729	125562	phecode 561	digestive
Other disorders of intestine	OR=1.13 (0.98 to 1.31)	0.09356	0.337419	150634	8668	141966	phecode 569	digestive
Hemorrhage of rectum and anus	OR=1.17 (0.97 to 1.41)	0.09411	0.337419	151592	5250	146342	phecode 578.8	digestive
Vitamin D	0.029 (-0.005 to 0.063)	0.09552	0.339712	145566	NA	NA	NA	biomarker
Heart valve disorders	OR=0.83 (0.67 to 1.03)	0.09722	0.342992	152826	3826	149000	phecode 395	circulatory system
Atrial fibrillation and flutter	OR=1.12 (0.98 to 1.28)	0.09831	0.344085	150383	10372	140011	phecode 427.2	circulatory system
Other diseases of blood and blood forming organs	OR=1.27 (0.95 to 1.68)	0.1008	0.350022	155768	2180	153588	phecode 289	hematopoietic
Peripheral enthesopathies and allied syndromes	OR=1.15 (0.97 to 1.36)	0.1059	0.362372	149433	6407	143026	phecode 726	musculoskeletal
Intervertebral disc disorders	OR=1.22 (0.96 to 1.56)	0.106	0.362372	153832	2913	150919	phecode 722	musculoskeletal
Hemorrhage of gastrointestinal tract	OR=1.22 (0.96 to 1.55)	0.1078	0.362387	149364	3022	146342	phecode 578.9	digestive
Urethral stricture not specified as infectious	OR=1.29 (0.95 to 1.75)	0.1082	0.362387	150977	1838	149139	phecode 597.1	genitourinary
Tobacco use disorder	OR=1.12 (0.98 to 1.28)	0.1097	0.362387	151119	10356	140763	phecode 318	mental disorders
Osteoarthrosis NOS	OR=1.17 (0.97 to 1.41)	0.1105	0.362387	150594	5104	145490	phecode 740.9	musculoskeletal
Cough	OR=1.34 (0.94 to 1.92)	0.1111	0.362387	152453	1344	151109	phecode 512.8	respiratory
Unstable angina intermediate coronary syndrome	OR=1.22 (0.95 to 1.55)	0.1121	0.362387	139239	2997	136242	phecode 411.1	circulatory system
Other disorders of synovium; tendon; and bursa	OR=1.19 (0.96 to 1.47)	0.113	0.362387	146899	3873	143026	phecode 727	musculoskeletal
Esophageal bleeding varicesorhemorrhage	OR=0.71 (0.47 to 1.08)	0.1133	0.362387	137865	980	136885	phecode 530.2	digestive
LDL direct	-0.023 (-0.052 to 0.006)	0.1134	0.362387	149626	NA	NA	NA	biomarker
Gastric ulcer	OR=0.79 (0.59 to 1.06)	0.1171	0.370755	155429	2060	153369	phecode 531.2	digestive
Cystatin C	0.026 (-0.006 to 0.057)	0.1177	0.370755	149927	NA	NA	NA	biomarker
Other and unspecified disc disorder	OR=1.25 (0.94 to 1.67)	0.121	0.375782	153055	2136	150919	phecode 722.9	musculoskeletal
Hypotension	OR=0.84 (0.67 to 1.05)	0.1263	0.389499	148804	3444	145360	phecode 458	circulatory system
Other local infections of skin and subcutaneous tissue	OR=0.81 (0.61 to 1.06)	0.1272	0.38955	153426	2334	151092	phecode 686	dermatologic
Acute pulmonary heart disease	OR=1.24 (0.94 to 1.64)	0.1339	0.404451	155042	2226	152816	phecode 415.1	circulatory system
Pulmonary embolism and infarction; acute	OR=1.24 (0.94 to 1.64)	0.1339	0.404451	155042	2226	152816	phecode 415.11	circulatory system
Cardiac pacemakerordevice in situ	OR=1.26 (0.93 to 1.71)	0.1385	0.414778	141903	1892	140011	phecode 426.9	circulatory system
Abnormal findings examination of lungs	OR=1.31 (0.92 to 1.86)	0.1392	0.414778	157211	1391	155820	phecode 514	respiratory
Renal failure	OR=1.13 (0.96 to 1.34)	0.1421	0.420578	155360	6446	148914	phecode 585	genitourinary
Malaise and fatigue	OR=1.3 (0.92 to 1.83)	0.1444	0.423012	157211	1440	155771	phecode 798	symptoms
Other specified peripheral vascular diseases	OR=1.23 (0.93 to 1.64)	0.145	0.423012	153785	2210	151575	phecode 443.8	circulatory system
Transient cerebral ischemia	OR=0.76 (0.52 to 1.1)	0.1458	0.423012	152337	1222	151115	phecode 433.31	circulatory system
Poisoning by analgesics; antipyretics; and antirheumatics	OR=1.22 (0.93 to 1.61)	0.1511	0.434414	148899	2287	146612	phecode 965	injuries and poisonings
Diseases of white blood cells	OR=1.27 (0.92 to 1.75)	0.1517	0.434414	155271	1683	153588	phecode 288	hematopoietic
Non Hodgkins lymphoma	OR=1.32 (0.9 to 1.95)	0.1531	0.435594	155517	1170	154347	phecode 202.2	neoplasms
Epilepsy; recurrent seizures; convulsions	OR=1.21 (0.93 to 1.57)	0.155	0.438173	149628	2525	147103	phecode 345	neurological
Hypotension NOS	OR=0.84 (0.66 to 1.07)	0.1581	0.44409	148355	2995	145360	phecode 458.9	circulatory system
Dizziness and giddiness Light headedness and vertigo	OR=1.22 (0.92 to 1.62)	0.1639	0.457468	156589	2216	154373	phecode 386.9	sense organs
Other disorders of bladder	OR=1.13 (0.95 to 1.35)	0.1665	0.461802	154968	5829	149139	phecode 596	genitourinary
Cardiac pacemaker in situ	OR=1.25 (0.91 to 1.72)	0.1703	0.469389	141740	1729	140011	phecode 426.91	circulatory system
Abnormal sputum	OR=1.2 (0.92 to 1.56)	0.1725	0.47022	157211	2581	154630	phecode 516	respiratory
Effects radiation NOS	OR=1.24 (0.91 to 1.68)	0.1738	0.47022	155439	1852	153587	phecode 990	injuries and poisonings
Acute pancreatitis	OR=1.34 (0.88 to 2.06)	0.1754	0.471551	156801	950	155851	phecode 577.1	digestive
Rheumatic disease of the heart valves	OR=0.85 (0.68 to 1.08)	0.1771	0.471551	152296	3296	149000	phecode 394	circulatory system
Heart valve replaced	OR=0.75 (0.5 to 1.14)	0.1775	0.471551	150046	1046	149000	phecode 395.6	circulatory system
Enthesopathy	OR=1.15 (0.93 to 1.42)	0.184	0.483336	147072	4046	143026	phecode 726.1	musculoskeletal
Other hypertrophic and atrophic conditions of skin	OR=1.24 (0.9 to 1.69)	0.1857	0.483336	157153	1777	155376	phecode 701	dermatologic
Bacterial infection NOS	OR=1.13 (0.94 to 1.34)	0.186	0.483336	155365	5876	149489	phecode 041	infectious diseases
Varicose veins	OR=1.16 (0.93 to 1.44)	0.1866	0.483336	144964	3691	141273	phecode 454	circulatory system
Cancer of other lymphoid; histiocytic tissue	OR=1.26 (0.89 to 1.79)	0.1903	0.483336	155784	1437	154347	phecode 202	neoplasms
Colon cancer	OR=1.22 (0.91 to 1.64)	0.1905	0.483336	118823	1997	116826	phecode 153.2	neoplasms
Atopicorcontact dermatitis due to other or unspecified	OR=1.31 (0.87 to 1.98)	0.1906	0.483336	155217	1029	154188	phecode 939	dermatologic
Chronic renal failure CKD	OR=1.17 (0.92 to 1.48)	0.1912	0.483336	152156	3242	148914	phecode 585.3	genitourinary
Chronic ulcer of skin	OR=1.26 (0.89 to 1.79)	0.1918	0.483336	157211	1420	155791	phecode 707	dermatologic
Pulmonary heart disease	OR=1.19 (0.91 to 1.55)	0.1976	0.493873	155334	2518	152816	phecode 415	circulatory system
Benign neoplasm of colon	OR=1.09 (0.96 to 1.24)	0.1995	0.493873	128626	11711	116915	phecode 208	neoplasms
Other derangement of joint	OR=1.3 (0.87 to 1.95)	0.2016	0.493873	155391	1053	154338	phecode 742.9	musculoskeletal
Bacterial enteritis	OR=1.28 (0.87 to 1.89)	0.2025	0.493873	153897	1169	152728	phecode 008.5	infectious diseases
Complications of transplants and reattached limbs	OR=1.1 (0.95 to 1.27)	0.205	0.493873	154168	8858	145310	phecode 851	injuries and poisonings
Secondary malignancy of lymph nodes	OR=1.21 (0.9 to 1.61)	0.2059	0.493873	139898	2091	137807	phecode 198.1	neoplasms
Retinal detachments and defects	OR=0.82 (0.6 to 1.12)	0.2062	0.493873	152471	1845	150626	phecode 361	sense organs
Retinal detachment with retinal defect	OR=0.82 (0.6 to 1.12)	0.2062	0.493873	152471	1845	150626	phecode 361.1	sense organs
Abdominal pain	OR=1.08 (0.96 to 1.22)	0.2069	0.493873	157211	13297	143914	phecode 785	symptoms
Osteoporosis; osteopenia and pathological fracture	OR=0.8 (0.57 to 1.13)	0.2075	0.493873	157211	1482	155729	phecode 743	musculoskeletal
Fracture of upper limb	OR=0.86 (0.68 to 1.09)	0.2083	0.493873	152093	3153	148940	phecode 803	injuries and poisonings
Redundant prepuce and phimosisorBXO	OR=1.18 (0.91 to 1.54)	0.2127	0.501608	141251	2493	138758	phecode 604.1	genitourinary
Nerve root and plexus disorders	OR=1.21 (0.9 to 1.62)	0.2141	0.502224	153006	2000	151006	phecode 353	neurological
Other disorders of the kidney and ureters	OR=1.2 (0.9 to 1.61)	0.2165	0.505167	150972	2058	148914	phecode 586	genitourinary
Duodenitis	OR=1.14 (0.93 to 1.4)	0.2194	0.509239	146811	4217	142594	phecode 535.6	digestive
Left bundle branch block	OR=1.26 (0.86 to 1.85)	0.2281	0.52666	141209	1198	140011	phecode 426.32	circulatory system
Fracture of tibia and fibula	OR=0.77 (0.5 to 1.18)	0.2296	0.527362	149884	944	148940	phecode 800.3	injuries and poisonings
Renal colic	OR=0.79 (0.53 to 1.17)	0.2328	0.531942	153392	1137	152255	phecode 594.8	genitourinary
Malignant neoplasm of rectum; rectosigmoid junction; and anus	OR=1.23 (0.87 to 1.73)	0.2352	0.534656	118320	1494	116826	phecode 153.3	neoplasms
Atherosclerosis	OR=1.28 (0.85 to 1.92)	0.2419	0.547066	152626	1051	151575	phecode 440	circulatory system
Cataract	OR=1.09 (0.94 to 1.25)	0.2464	0.551027	157211	9843	147368	phecode 366	sense organs
Fracture of vertebral column without mention of spinal cord injury	OR=0.77 (0.5 to 1.2)	0.2472	0.551027	149858	918	148940	phecode 805	injuries and poisonings
Other retinal disorders	OR=1.17 (0.9 to 1.52)	0.2474	0.551027	96487	2665	93822	phecode 362	sense organs
Other disorders of soft tissues	OR=0.87 (0.69 to 1.1)	0.25	0.55402	146197	3171	143026	phecode 729	musculoskeletal
Candidiasis	OR=1.26 (0.84 to 1.89)	0.2541	0.560291	156902	1064	155838	phecode 112	infectious diseases
Coronary atherosclerosis	OR=1.07 (0.95 to 1.2)	0.2565	0.562769	151051	14809	136242	phecode 411.4	circulatory system
Reflux esophagitis	OR=1.11 (0.92 to 1.34)	0.2601	0.567842	142036	5151	136885	phecode 530.14	digestive
Hemoptysis	OR=1.16 (0.89 to 1.51)	0.2754	0.598283	157105	2475	154630	phecode 516.1	respiratory
Tachycardia NOS	OR=0.81 (0.55 to 1.19)	0.2782	0.601403	141157	1146	140011	phecode 427.7	circulatory system
Frequency of urination and polyuria	OR=1.18 (0.87 to 1.59)	0.2825	0.605103	146763	1962	144801	phecode 599.5	genitourinary
Disturbance of skin sensation	OR=1.23 (0.84 to 1.79)	0.2833	0.605103	155152	1220	153932	phecode 687.4	dermatologic
Pain in joint	OR=1.14 (0.9 to 1.44)	0.2845	0.605103	157211	3215	153996	phecode 745	musculoskeletal
Secondary malignant neoplasm	OR=1.12 (0.91 to 1.37)	0.2854	0.605103	142238	4431	137807	phecode 198	neoplasms
Angina pectoris	OR=1.07 (0.94 to 1.23)	0.2908	0.613602	147250	11008	136242	phecode 411.3	circulatory system
Dysphagia	OR=0.88 (0.68 to 1.12)	0.2926	0.614265	139768	2883	136885	phecode 532	digestive
Superficial injury without mention of infection	OR=1.14 (0.89 to 1.47)	0.2939	0.614265	156951	2791	154160	phecode 915	injuries and poisonings
Decreased white blood cell count	OR=1.21 (0.85 to 1.72)	0.3008	0.622783	154969	1381	153588	phecode 288.1	hematopoietic
Neutropenia	OR=1.21 (0.85 to 1.72)	0.3008	0.622783	154969	1381	153588	phecode 288.11	hematopoietic
Colorectal cancer	OR=1.14 (0.89 to 1.45)	0.3035	0.62475	119810	2984	116826	phecode 153	neoplasms
Diabetes mellitus	OR=1.07 (0.94 to 1.21)	0.3053	0.62475	157211	12038	145173	phecode 250	endocrine metabolic
Fracture of radius and ulna	OR=0.84 (0.6 to 1.18)	0.306	0.62475	150452	1512	148940	phecode 803.2	injuries and poisonings
Diabetic retinopathy	OR=1.25 (0.81 to 1.95)	0.3108	0.627976	94735	913	93822	phecode 250.7	endocrine metabolic
Calculus of kidney	OR=1.16 (0.87 to 1.56)	0.3117	0.627976	154296	2041	152255	phecode 594.1	genitourinary
Diseases of the larynx and vocal cords	OR=1.22 (0.83 to 1.8)	0.3123	0.627976	149221	1164	148057	phecode 473	respiratory
Peripheral vascular disease	OR=1.15 (0.88 to 1.51)	0.3143	0.627976	153963	2388	151575	phecode 443	circulatory system
Derangement of joint; non traumatic	OR=1.21 (0.84 to 1.75)	0.3147	0.627976	155611	1273	154338	phecode 742	musculoskeletal
Degenerative disease of the spinal cord	OR=1.23 (0.82 to 1.84)	0.3164	0.628079	148165	1062	147103	phecode 334	neurological
Other diseases of the teeth and supporting structures	OR=1.22 (0.83 to 1.79)	0.3176	0.628079	154150	1161	152989	phecode 525	digestive
Pericarditis	OR=0.8 (0.51 to 1.25)	0.3219	0.633741	155919	879	155040	phecode 420.2	circulatory system
Abnormal heart sounds	OR=0.9 (0.74 to 1.1)	0.3248	0.636608	153532	4532	149000	phecode 396	circulatory system
Cerebral ischemia	OR=1.14 (0.88 to 1.48)	0.3287	0.641401	153702	2587	151115	phecode 433.3	circulatory system
Other anemias	OR=0.91 (0.76 to 1.1)	0.3329	0.646735	154546	5218	149328	phecode 285	hematopoietic
Cancer of bronchus; lung	OR=0.84 (0.6 to 1.19)	0.3365	0.648597	156871	1458	155413	phecode 165.1	neoplasms
Other symptoms of respiratory system	OR=1.09 (0.92 to 1.29)	0.3368	0.648597	157211	6102	151109	phecode 512	respiratory
Ileostomy status	OR=1.23 (0.8 to 1.91)	0.3448	0.660942	126476	914	125562	phecode 559	digestive
Benign neoplasm of other parts of digestive system	OR=1.14 (0.86 to 1.51)	0.3504	0.660942	157211	2238	154973	phecode 211	neoplasms
Precordial pain	OR=0.86 (0.63 to 1.18)	0.351	0.660942	144876	1843	143033	phecode 418.1	circulatory system
Hemorrhage or hematoma complicating a procedure	OR=1.14 (0.87 to 1.5)	0.3523	0.660942	147619	2309	145310	phecode 850	injuries and poisonings
Hypertensive heart andoror renal disease	OR=1.21 (0.81 to 1.81)	0.3545	0.660942	117021	1064	115957	phecode 401.2	circulatory system
Blood in stool	OR=1.18 (0.83 to 1.66)	0.3546	0.660942	147799	1457	146342	phecode 578.2	digestive
Cholelithiasis with other cholecystitis	OR=1.17 (0.84 to 1.64)	0.355	0.660942	153385	1525	151860	phecode 574.12	digestive
Senile cataract	OR=1.1 (0.9 to 1.35)	0.3552	0.660942	151653	4285	147368	phecode 366.2	sense organs
Chemotherapy	OR=1.08 (0.92 to 1.26)	0.3621	0.668666	144944	7137	137807	phecode 197	neoplasms
Fracture of ankle and foot	OR=0.81 (0.52 to 1.27)	0.3637	0.668666	149820	880	148940	phecode 801	injuries and poisonings
Dislocation	OR=1.2 (0.81 to 1.79)	0.3639	0.668666	149324	1082	148242	phecode 830	injuries and poisonings
Hypovolemia	OR=1.16 (0.84 to 1.58)	0.3694	0.675956	154337	1763	152574	phecode 276.5	endocrine metabolic
Urate	1.102 (-1.318 to 3.523)	0.372	0.677901	149755	NA	NA	NA	biomarker
Ulcer of esophagus	OR=1.12 (0.87 to 1.43)	0.3746	0.67983	139816	2931	136885	phecode 530.12	digestive
Swelling of limb	OR=0.88 (0.66 to 1.17)	0.3797	0.686261	156888	2127	154761	phecode 771.1	symptoms
Cardiac dysrhythmias	OR=1.05 (0.94 to 1.18)	0.3876	0.69768	154977	14966	140011	phecode 427	circulatory system
Appendiceal conditions	OR=0.86 (0.62 to 1.21)	0.4009	0.718277	157211	1516	155695	phecode 540	digestive
Urinary incontinence	OR=1.17 (0.81 to 1.71)	0.4023	0.718277	146048	1247	144801	phecode 599.4	genitourinary
Cardiac arrest and ventricular fibrillation	OR=1.2 (0.78 to 1.85)	0.4041	0.718581	140944	933	140011	phecode 427.4	circulatory system
Disorders of penis	OR=1.11 (0.87 to 1.41)	0.4088	0.724019	141790	3032	138758	phecode 604	genitourinary
Acquired foot deformities	OR=0.86 (0.61 to 1.23)	0.418	0.73683	155349	1384	153965	phecode 735	musculoskeletal
Acute renal failure	OR=1.09 (0.88 to 1.35)	0.4202	0.73683	152907	3993	148914	phecode 585.1	genitourinary
Aortic aneurysm	OR=1.16 (0.81 to 1.67)	0.4227	0.73683	152901	1326	151575	phecode 442.1	circulatory system
Calculus of bile duct	OR=0.84 (0.54 to 1.3)	0.4239	0.73683	152759	899	151860	phecode 574.2	digestive
Complication due to other implant and internal device	OR=1.14 (0.83 to 1.58)	0.4264	0.73683	146977	1667	145310	phecode 859	injuries and poisonings
Diseases of hair and hair follicles	OR=0.9 (0.68 to 1.18)	0.4279	0.73683	156720	2347	154373	phecode 704	dermatologic
Skull and face fracture and other intercranial injury	OR=1.13 (0.84 to 1.52)	0.4286	0.73683	157211	1949	155262	phecode 819	injuries and poisonings
Ischemic Heart Disease	OR=1.04 (0.94 to 1.15)	0.4294	0.73683	156847	20605	136242	phecode 411	circulatory system
Localized superficial swelling; mass; or lump	OR=1.19 (0.76 to 1.86)	0.4391	0.750555	154808	876	153932	phecode 687.2	dermatologic
Other chronic ischemic heart disease; unspecified	OR=1.04 (0.94 to 1.16)	0.4465	0.75869	154252	18010	136242	phecode 411.8	circulatory system
Epistaxis or throat hemorrhage	OR=1.15 (0.8 to 1.64)	0.4473	0.75869	149441	1384	148057	phecode 477	respiratory
Disorders of fluid; electrolyte; and acid base balance	OR=1.08 (0.89 to 1.31)	0.4498	0.759138	157211	4637	152574	phecode 276	endocrine metabolic
Electrolyte imbalance	OR=1.1 (0.85 to 1.43)	0.4537	0.759138	155178	2604	152574	phecode 276.1	endocrine metabolic
Open wounds of extremities	OR=1.1 (0.86 to 1.41)	0.4541	0.759138	154725	2867	151858	phecode 871	injuries and poisonings
Bacterial pneumonia	OR=0.92 (0.75 to 1.14)	0.4553	0.759138	154608	4193	150415	phecode 480.1	respiratory
Cystitis and urethritis	OR=1.16 (0.78 to 1.72)	0.4569	0.759138	145262	1113	144149	phecode 592	genitourinary
Cerebral artery occlusion; with cerebral infarction	OR=0.87 (0.6 to 1.26)	0.4601	0.759138	152417	1302	151115	phecode 433.21	circulatory system
Carbuncle and furuncle	OR=0.87 (0.59 to 1.27)	0.4612	0.759138	152286	1194	151092	phecode 686.1	dermatologic
Paroxysmal supraventricular tachycardia	OR=0.86 (0.58 to 1.28)	0.4626	0.759138	141140	1129	140011	phecode 427.11	circulatory system
Disorders of refraction and accommodation; blindness and low vision	OR=1.14 (0.8 to 1.62)	0.4645	0.759138	157211	1411	155800	phecode 367	sense organs
Symptoms and disorders of the joints	OR=1.13 (0.82 to 1.55)	0.4665	0.759138	156044	1706	154338	phecode 741	musculoskeletal
Varicose veins of lower extremity	OR=1.09 (0.87 to 1.37)	0.4665	0.759138	144622	3349	141273	phecode 454.1	circulatory system
Appendicitis	OR=0.88 (0.62 to 1.24)	0.4696	0.761374	157158	1463	155695	phecode 540.1	digestive
Shortness of breath	OR=1.1 (0.85 to 1.4)	0.4718	0.762093	153980	2871	151109	phecode 512.7	respiratory
Open wounds of head; neck; and trunk	OR=1.11 (0.84 to 1.46)	0.4735	0.762093	154137	2279	151858	phecode 870	injuries and poisonings
Malignant neoplasm of other and ill defined sites within the digestive organs and peritoneum	OR=1.09 (0.86 to 1.38)	0.4796	0.768327	118550	3285	115265	phecode 159	neoplasms
Neurological disorders	OR=1.09 (0.85 to 1.39)	0.4821	0.768327	155814	2943	152871	phecode 292	mental disorders
Peptic ulcer excl esophageal	OR=0.93 (0.75 to 1.15)	0.4826	0.768327	157211	3842	153369	phecode 531	digestive
Cancer of bladder	OR=0.9 (0.66 to 1.22)	0.4872	0.77286	156022	1868	154154	phecode 189.2	neoplasms
Other acquired deformities of limbs	OR=1.16 (0.75 to 1.8)	0.4915	0.773613	154886	921	153965	phecode 736	musculoskeletal
Musculoskeletal symptoms referable to limbs	OR=0.91 (0.7 to 1.19)	0.4932	0.773613	157211	2450	154761	phecode 771	symptoms
Abnormal movement	OR=1.11 (0.82 to 1.5)	0.4948	0.773613	157211	1915	155296	phecode 350	neurological
Emphysema	OR=1.15 (0.78 to 1.69)	0.4949	0.773613	144084	1145	142939	phecode 496.1	respiratory
Hereditary retinal dystrophies	OR=1.16 (0.75 to 1.79)	0.4971	0.773613	94759	937	93822	phecode 362.7	sense organs
Vertiginous syndromes and other disorders of vestibular system	OR=1.09 (0.85 to 1.4)	0.4982	0.773613	157211	2838	154373	phecode 386	sense organs
Pain in limb	OR=1.1 (0.84 to 1.44)	0.5084	0.786682	157211	2384	154827	phecode 773	symptoms
Renal failure NOS	OR=1.15 (0.75 to 1.77)	0.5104	0.787015	149863	949	148914	phecode 585.2	genitourinary
Acquired toe deformities	OR=0.87 (0.56 to 1.34)	0.5169	0.79015	154873	908	153965	phecode 735.2	musculoskeletal
Sepsis	OR=1.1 (0.82 to 1.49)	0.5184	0.79015	157211	1954	155257	phecode 994.2	injuries and poisonings
Sepsis and SIRS	OR=1.1 (0.82 to 1.49)	0.5184	0.79015	157211	1954	155257	phecode 994	injuries and poisonings
Acute appendicitis	OR=0.89 (0.61 to 1.28)	0.5196	0.79015	156962	1267	155695	phecode 540.11	digestive
Ganglion and cyst of synovium; tendon; and bursa	OR=1.15 (0.75 to 1.76)	0.5231	0.792739	143973	947	143026	phecode 727.4	musculoskeletal
Hematuria	OR=1.05 (0.9 to 1.22)	0.5269	0.795763	152438	8289	144149	phecode 593	genitourinary
Alcohol related disorders	OR=1.05 (0.9 to 1.22)	0.5317	0.797078	149004	8241	140763	phecode 317	mental disorders
Inflammatory and toxic neuropathy	OR=0.88 (0.6 to 1.31)	0.5323	0.797078	156804	1127	155677	phecode 357	neurological
Pleurisy; pleural effusion	OR=1.07 (0.87 to 1.32)	0.5344	0.797078	153858	4080	149778	phecode 507	respiratory
Other specified cardiac dysrhythmias	OR=0.91 (0.69 to 1.21)	0.535	0.797078	142197	2186	140011	phecode 427.3	circulatory system
Fracture of clavicle or scapula	OR=0.88 (0.59 to 1.31)	0.5371	0.797512	150048	1108	148940	phecode 803.3	injuries and poisonings
Ulcerative colitis	OR=0.9 (0.65 to 1.26)	0.5441	0.804349	127122	1560	125562	phecode 555.2	digestive
Hematemesis	OR=1.13 (0.76 to 1.69)	0.5482	0.804349	147411	1069	146342	phecode 578.1	digestive
Superficial cellulitis and abscess	OR=1.06 (0.87 to 1.31)	0.5485	0.804349	155296	4204	151092	phecode 681	dermatologic
Nasal polyps	OR=1.1 (0.81 to 1.48)	0.549	0.804349	150012	1955	148057	phecode 471	respiratory
Other disorders of arteries and arterioles	OR=1.13 (0.75 to 1.72)	0.5527	0.807088	152579	1004	151575	phecode 447	circulatory system
Symptoms affecting skin	OR=1.07 (0.85 to 1.35)	0.5566	0.808264	157211	3279	153932	phecode 687	dermatologic
Neoplasm of uncertain behavior	OR=0.9 (0.64 to 1.27)	0.5583	0.808264	139321	1514	137807	phecode 199	neoplasms
Palpitations	OR=0.9 (0.62 to 1.29)	0.5598	0.808264	141308	1297	140011	phecode 427.9	circulatory system
Thrombocytopenia	OR=1.14 (0.74 to 1.76)	0.5619	0.808264	156674	918	155756	phecode 287.3	hematopoietic
Unspecified diffuse connective tissue disease	OR=0.89 (0.59 to 1.34)	0.5644	0.808264	145036	1019	144017	phecode 709.7	dermatologic
Fracture of ribs	OR=0.89 (0.59 to 1.33)	0.5654	0.808264	149986	1046	148940	phecode 807	injuries and poisonings
Retention of urine	OR=1.05 (0.88 to 1.26)	0.5681	0.808264	150344	5543	144801	phecode 599.2	genitourinary
Substance addiction and disorders	OR=1.06 (0.86 to 1.32)	0.5687	0.808264	144599	3836	140763	phecode 316	mental disorders
Atrioventricular AV block	OR=1.1 (0.8 to 1.51)	0.57	0.808264	141731	1720	140011	phecode 426.2	circulatory system
Apolipoprotein B	-0.002 (-0.01 to 0.006)	0.5824	0.8232	148956	NA	NA	NA	biomarker
Other disorders of stomach and duodenum	OR=1.07 (0.85 to 1.34)	0.588	0.82846	145936	3342	142594	phecode 537	digestive
Secondary malignancy of respiratory organs	OR=0.9 (0.62 to 1.31)	0.5917	0.831018	139057	1250	137807	phecode 198.2	neoplasms
Pneumococcal pneumonia	OR=0.94 (0.76 to 1.17)	0.5945	0.8323	154129	3714	150415	phecode 480.11	respiratory
Hyposmolality andoror hyponatremia	OR=1.11 (0.74 to 1.66)	0.605	0.84432	153659	1085	152574	phecode 276.12	endocrine metabolic
Constipation	OR=1.05 (0.86 to 1.29)	0.608	0.84583	130028	4466	125562	phecode 563	digestive
Aspartate aminotransferase	0.009 (-0.025 to 0.043)	0.6111	0.847469	149354	NA	NA	NA	biomarker
Septicemia	OR=1.07 (0.83 to 1.38)	0.6146	0.849651	152151	2662	149489	phecode 038	infectious diseases
Ventral hernia	OR=1.08 (0.79 to 1.49)	0.6197	0.854024	131993	1754	130239	phecode 550.5	digestive
Other non epithelial cancer of skin	OR=1.04 (0.9 to 1.19)	0.6226	0.855348	155540	10010	145530	phecode 172.2	neoplasms
Other abnormal blood chemistry	OR=1.05 (0.87 to 1.26)	0.6336	0.867757	157098	5126	151972	phecode 790.6	symptoms
Overweight; obesity and other hyperalimentation	OR=1.04 (0.87 to 1.24)	0.645	0.880118	157211	5734	151477	phecode 278	endocrine metabolic
Other aneurysm	OR=1.08 (0.77 to 1.51)	0.6493	0.880118	153158	1583	151575	phecode 442	circulatory system
Streptococcus infection	OR=1.11 (0.72 to 1.71)	0.6495	0.880118	150400	911	149489	phecode 041.2	infectious diseases
Cholecystitis without cholelithiasis	OR=0.91 (0.6 to 1.38)	0.6512	0.880118	152857	997	151860	phecode 574.3	digestive
Nonspecific findings on examination of blood	OR=1.04 (0.87 to 1.26)	0.6541	0.880118	157211	5239	151972	phecode 790	symptoms
Cancer of urinary organs incl kidney and bladder	OR=1.06 (0.83 to 1.34)	0.6546	0.880118	157211	3057	154154	phecode 189	neoplasms
Viral infection	OR=1.1 (0.73 to 1.64)	0.6602	0.880953	155858	1051	154807	phecode 079	infectious diseases
Diseases of sebaceous glands	OR=0.95 (0.76 to 1.19)	0.6611	0.880953	156848	3588	153260	phecode 706	dermatologic
Diffuse diseases of connective tissue	OR=0.92 (0.62 to 1.36)	0.6627	0.880953	145150	1133	144017	phecode 709	dermatologic
Cholelithiasis	OR=1.05 (0.85 to 1.29)	0.6637	0.880953	156001	4141	151860	phecode 574.1	digestive
Abnormal results of function study of liver	OR=1.07 (0.78 to 1.46)	0.6672	0.880953	154132	1811	152321	phecode 573.7	digestive
Obesity	OR=1.04 (0.87 to 1.24)	0.6677	0.880953	157184	5707	151477	phecode 278.1	endocrine metabolic
Fracture of hand or wrist	OR=0.93 (0.67 to 1.29)	0.6728	0.880953	150596	1656	148940	phecode 804	injuries and poisonings
Diverticulosis	OR=0.97 (0.86 to 1.1)	0.6732	0.880953	139014	13452	125562	phecode 562.1	digestive
Diverticulosis and diverticulitis	OR=0.97 (0.86 to 1.1)	0.6732	0.880953	139014	13452	125562	phecode 562	digestive
Cardiac conduction disorders	OR=1.04 (0.86 to 1.26)	0.6831	0.89069	145047	5036	140011	phecode 426	circulatory system
Sebaceous cyst	OR=0.96 (0.76 to 1.19)	0.6865	0.89069	156823	3563	153260	phecode 706.2	dermatologic
Inflammation of eyelids	OR=1.09 (0.73 to 1.62)	0.6867	0.89069	154216	1085	153131	phecode 371.3	sense organs
Complication of internal orthopedic device	OR=1.06 (0.8 to 1.41)	0.701	0.905204	147475	2165	145310	phecode 858	injuries and poisonings
Skin cancer	OR=1.03 (0.9 to 1.17)	0.7042	0.905204	157141	11611	145530	phecode 172	neoplasms
Leukemia	OR=0.93 (0.64 to 1.36)	0.7061	0.905204	155553	1206	154347	phecode 204	neoplasms
Nausea and vomiting	OR=0.96 (0.78 to 1.18)	0.7061	0.905204	157211	4168	153043	phecode 789	symptoms
Inflammation of the eye	OR=1.07 (0.75 to 1.53)	0.7099	0.907437	154480	1349	153131	phecode 371	sense organs
Psoriasis vulgaris	OR=0.93 (0.61 to 1.41)	0.7242	0.920635	143312	981	142331	phecode 696.41	dermatologic
Paroxysmal tachycardia; unspecified	OR=0.94 (0.69 to 1.29)	0.7244	0.920635	141775	1764	140011	phecode 427.1	circulatory system
Malignant neoplasm of bladder	OR=0.94 (0.68 to 1.31)	0.728	0.922552	155780	1626	154154	phecode 189.21	neoplasms
Hearing loss	OR=0.96 (0.74 to 1.24)	0.7304	0.922941	157185	2573	154612	phecode 389	sense organs
Urea	0.008 (-0.037 to 0.053)	0.7421	0.935046	149832	NA	NA	NA	biomarker
Respiratory failure	OR=1.06 (0.75 to 1.49)	0.747	0.938184	151257	1479	149778	phecode 509.1	respiratory
Cancer within the respiratory system	OR=0.95 (0.69 to 1.3)	0.752	0.938184	157193	1780	155413	phecode 165	neoplasms
Aphakia and other disorders of lens	OR=0.93 (0.61 to 1.43)	0.7529	0.938184	154756	969	153787	phecode 379.3	sense organs
Staphylococcus infections	OR=1.05 (0.77 to 1.43)	0.7531	0.938184	151291	1802	149489	phecode 041.1	infectious diseases
Glaucoma	OR=1.04 (0.8 to 1.36)	0.7555	0.938523	153095	2469	150626	phecode 365	sense organs
Iron deficiency anemias	OR=0.97 (0.77 to 1.21)	0.7634	0.940227	152701	3373	149328	phecode 280	hematopoietic
Iron deficiency anemias; unspecified or not due to blood loss	OR=0.97 (0.77 to 1.21)	0.7634	0.940227	152701	3373	149328	phecode 280.1	hematopoietic
Calculus of ureter	OR=1.05 (0.76 to 1.46)	0.7645	0.940227	153872	1617	152255	phecode 594.3	genitourinary
Degeneration of intervertebral disc	OR=1.06 (0.72 to 1.57)	0.7654	0.940227	152067	1148	150919	phecode 722.6	musculoskeletal
Chronic liver disease and cirrhosis	OR=0.96 (0.7 to 1.3)	0.7718	0.945455	154165	1844	152321	phecode 571	digestive
Other forms of chronic heart disease	OR=1.05 (0.75 to 1.46)	0.7809	0.949864	137837	1595	136242	phecode 414	circulatory system
Occlusion and stenosis of precerebral arteries	OR=1.06 (0.69 to 1.64)	0.7817	0.949864	152030	915	151115	phecode 433.1	circulatory system
Bundle branch block	OR=0.96 (0.74 to 1.26)	0.7893	0.949864	142464	2453	140011	phecode 426.3	circulatory system
Lipoprotein A	-0.005 (-0.043 to 0.033)	0.7894	0.949864	118783	NA	NA	NA	biomarker
Benign neoplasm of skin	OR=1.03 (0.81 to 1.32)	0.7904	0.949864	156940	2940	154000	phecode 216	neoplasms
Melanomas of skin	OR=1.04 (0.76 to 1.42)	0.7916	0.949864	147340	1810	145530	phecode 172.11	neoplasms
Melanomas of skin; dx or hx	OR=1.04 (0.76 to 1.42)	0.7916	0.949864	147340	1810	145530	phecode 172.1	neoplasms
Triglycerides	0.005 (-0.029 to 0.038)	0.7929	0.949864	149776	NA	NA	NA	biomarker
Urinary calculus	OR=1.03 (0.84 to 1.26)	0.7956	0.949864	156430	4175	152255	phecode 594	genitourinary
Acute upper respiratory infections of multiple or unspecified sites	OR=1.06 (0.69 to 1.62)	0.7977	0.949864	157150	942	156208	phecode 465	respiratory
Other open wound of head and face	OR=1.04 (0.77 to 1.4)	0.8014	0.949864	153838	1980	151858	phecode 870.3	injuries and poisonings
Other abnormality of urination	OR=1.05 (0.71 to 1.56)	0.8032	0.949864	145926	1125	144801	phecode 599.9	genitourinary
Diseases of hard tissues of teeth	OR=1.04 (0.74 to 1.47)	0.8034	0.949864	154484	1495	152989	phecode 521	digestive
Type 1 diabetes	OR=1.04 (0.74 to 1.46)	0.8102	0.953428	146702	1529	145173	phecode 250.1	endocrine metabolic
Phlebitis and thrombophlebitis	OR=0.97 (0.73 to 1.28)	0.8114	0.953428	143446	2173	141273	phecode 451	circulatory system
Dental caries	OR=1.04 (0.74 to 1.47)	0.8129	0.953428	154465	1476	152989	phecode 521.1	digestive
Rash and other nonspecific skin eruption	OR=0.95 (0.63 to 1.44)	0.8171	0.955306	154935	1003	153932	phecode 687.1	dermatologic
Complications of cardiacorvascular device; implant; and graft	OR=1.04 (0.75 to 1.44)	0.8206	0.955306	146946	1636	145310	phecode 854	injuries and poisonings
Stricture and stenosis of esophagus	OR=1.05 (0.71 to 1.54)	0.821	0.955306	138053	1168	136885	phecode 530.3	digestive
Pneumonia	OR=0.98 (0.83 to 1.16)	0.8253	0.957782	157057	6642	150415	phecode 480	respiratory
Other disorders of male genital organs	OR=0.97 (0.75 to 1.26)	0.8317	0.95805	141295	2537	138758	phecode 608	genitourinary
Abnormal findings on examination of urine	OR=1.03 (0.77 to 1.38)	0.8335	0.95805	157211	2083	155128	phecode 598	genitourinary
Congenital anomalies of great vessels	OR=1.04 (0.72 to 1.51)	0.8371	0.95805	156725	1267	155458	phecode 747.13	congenital anomalies
Other disorders of eye	OR=1.03 (0.77 to 1.39)	0.8393	0.95805	155754	1967	153787	phecode 379	sense organs
Orthostatic hypotension	OR=1.05 (0.68 to 1.61)	0.8398	0.95805	146303	943	145360	phecode 458.1	circulatory system
Occlusion of cerebral arteries	OR=0.97 (0.76 to 1.25)	0.8404	0.95805	153888	2773	151115	phecode 433.2	circulatory system
Respiratory failure; insufficiency; arrest	OR=0.97 (0.71 to 1.32)	0.8408	0.95805	151605	1827	149778	phecode 509	respiratory
Anal and rectal polyp	OR=1.02 (0.83 to 1.25)	0.8436	0.95805	146264	4298	141966	phecode 565.1	digestive
Benign neoplasm of unspecified sites	OR=0.96 (0.62 to 1.48)	0.8465	0.95805	157211	900	156311	phecode 229	neoplasms
Disorders of mineral metabolism	OR=0.97 (0.67 to 1.38)	0.8502	0.95805	157211	1343	155868	phecode 275	endocrine metabolic
Other disorders of testis	OR=0.97 (0.73 to 1.3)	0.8513	0.95805	140795	2037	138758	phecode 603	genitourinary
Carditis	OR=0.97 (0.68 to 1.38)	0.8516	0.95805	156416	1376	155040	phecode 420	circulatory system
Cystitis	OR=1.04 (0.69 to 1.56)	0.8587	0.961424	145195	1046	144149	phecode 592.1	genitourinary
Cholelithiasis and cholecystitis	OR=1.02 (0.84 to 1.24)	0.8605	0.961424	156526	4666	151860	phecode 574	digestive
Cellulitis and abscess of armorhand	OR=1.02 (0.81 to 1.28)	0.8655	0.961424	154462	3370	151092	phecode 681.3	dermatologic
Cellulitis and abscess of foot; toe	OR=1.02 (0.81 to 1.28)	0.8655	0.961424	154462	3370	151092	phecode 681.6	dermatologic
Cellulitis and abscess of leg; except foot	OR=1.02 (0.81 to 1.28)	0.8655	0.961424	154462	3370	151092	phecode 681.5	dermatologic
Duodenal ulcer	OR=0.98 (0.72 to 1.32)	0.8723	0.965276	155249	1880	153369	phecode 531.3	digestive
Respiratory insufficiency	OR=1.03 (0.71 to 1.49)	0.8759	0.965276	151070	1292	149778	phecode 509.2	respiratory
Aortic valve disease	OR=1.03 (0.67 to 1.59)	0.8782	0.965276	149938	938	149000	phecode 394.3	circulatory system
Cerebrovascular disease	OR=1.01 (0.84 to 1.22)	0.8806	0.965276	156525	5410	151115	phecode 433	circulatory system
Chronic sinusitis	OR=1.03 (0.7 to 1.53)	0.8813	0.965276	149183	1126	148057	phecode 475	respiratory
Inflammatory bowel disease and other gastroenteritis and colitis	OR=1.02 (0.76 to 1.37)	0.8821	0.965276	127644	2082	125562	phecode 555	digestive
Psoriasis and related disorders	OR=0.98 (0.67 to 1.41)	0.8962	0.977169	143599	1268	142331	phecode 696	dermatologic
Fever of unknown origin	OR=1.02 (0.76 to 1.37)	0.8974	0.977169	157211	2001	155210	phecode 783	symptoms
Bronchiectasis	OR=1.03 (0.66 to 1.59)	0.9107	0.984054	143844	905	142939	phecode 496.3	respiratory
Disorder of skin and subcutaneous tissue NOS	OR=0.99 (0.76 to 1.28)	0.9112	0.984054	157211	2609	154602	phecode 689	dermatologic
Circulatory disease NEC	OR=0.99 (0.86 to 1.14)	0.9157	0.984054	154635	9275	145360	phecode 459.9	circulatory system
Secondary malignant neoplasm of liver	OR=1.02 (0.72 to 1.43)	0.9175	0.984054	139299	1492	137807	phecode 198.4	neoplasms
Gastritis and duodenitis	OR=0.99 (0.88 to 1.12)	0.9176	0.984054	155649	13055	142594	phecode 535	digestive
Symptoms involving skin and other integumentary tissue	OR=1.02 (0.69 to 1.52)	0.9209	0.984054	157211	1099	156112	phecode 782	symptoms
Other disorders of circulatory system	OR=0.99 (0.86 to 1.14)	0.9221	0.984054	154746	9386	145360	phecode 459	circulatory system
First degree AV block	OR=1.02 (0.65 to 1.6)	0.9244	0.984054	140890	879	140011	phecode 426.21	circulatory system
Lymphadenitis	OR=1.02 (0.71 to 1.46)	0.9267	0.984054	154930	1342	153588	phecode 289.4	hematopoietic
Psoriasis	OR=0.98 (0.68 to 1.43)	0.9278	0.984054	143566	1235	142331	phecode 696.4	dermatologic
Hydrocele	OR=1.02 (0.7 to 1.47)	0.9293	0.984054	140023	1265	138758	phecode 603.1	genitourinary
Other disorders of liver	OR=0.99 (0.81 to 1.22)	0.9305	0.984054	156496	4175	152321	phecode 573	digestive
Abdominal aortic aneurysm	OR=1.02 (0.66 to 1.58)	0.9358	0.986529	152477	902	151575	phecode 442.11	circulatory system
Irritable Bowel Syndrome	OR=0.99 (0.69 to 1.4)	0.938	0.986529	126963	1401	125562	phecode 564.1	digestive
Other specified gastritis	OR=1.01 (0.81 to 1.26)	0.9407	0.986529	146248	3654	142594	phecode 535.8	digestive
Alcoholism	OR=1.01 (0.84 to 1.2)	0.9427	0.986529	146499	5736	140763	phecode 317.1	mental disorders
Phlebitis and thrombophlebitis of lower extremities	OR=0.99 (0.74 to 1.33)	0.9451	0.986529	143312	2039	141273	phecode 451.2	circulatory system
Other headache syndromes	OR=1.01 (0.79 to 1.29)	0.9483	0.986529	156671	2932	153739	phecode 339	neurological
Symptoms involving nervous and musculoskeletal systems	OR=1.01 (0.8 to 1.27)	0.9485	0.986529	157211	3214	153997	phecode 781	symptoms
Syncope and collapse	OR=1.01 (0.83 to 1.22)	0.9518	0.987632	157211	4965	152246	phecode 788	symptoms
Other upper respiratory disease	OR=0.99 (0.73 to 1.34)	0.9602	0.987739	149974	1917	148057	phecode 479	respiratory
Cardiomegaly	OR=1.01 (0.75 to 1.35)	0.963	0.987739	154883	2067	152816	phecode 416	circulatory system
Visual disturbances	OR=1.01 (0.72 to 1.41)	0.9632	0.987739	157211	1577	155634	phecode 368	sense organs
Abnormality of gait	OR=0.99 (0.69 to 1.43)	0.9664	0.987739	156620	1324	155296	phecode 350.2	neurological
Other disorders of biliary tract	OR=1.01 (0.66 to 1.55)	0.9676	0.987739	152791	931	151860	phecode 575.8	digestive
Rheumatoid arthritis and other inflammatory polyarthropathies	OR=1.01 (0.72 to 1.4)	0.9683	0.987739	157211	1585	155626	phecode 714	musculoskeletal
Other disorders of bone and cartilage	OR=0.99 (0.71 to 1.39)	0.9685	0.987739	153714	1535	152179	phecode 733	musculoskeletal
Purpura and other hemorrhagic conditions	OR=1.01 (0.67 to 1.52)	0.9724	0.987739	156790	1034	155756	phecode 287	hematopoietic
Rheumatoid arthritis	OR=1.01 (0.71 to 1.43)	0.9738	0.987739	157211	1398	155813	phecode 714.1	musculoskeletal
Cardiac congenital anomalies	OR=1.01 (0.73 to 1.39)	0.9743	0.987739	157103	1645	155458	phecode 747.1	congenital anomalies
Nonrheumatic aortic valve disorders	OR=1 (0.74 to 1.37)	0.9804	0.991643	150841	1841	149000	phecode 395.2	circulatory system
Pulmonary collapse; interstitial and compensatory emphysema	OR=1 (0.7 to 1.44)	0.9871	0.996135	151099	1321	149778	phecode 508	respiratory
Edema	OR=1 (0.66 to 1.51)	0.9921	0.997863	157129	1017	156112	phecode 782.3	symptoms
Other chronic nonalcoholic liver disease	OR=1 (0.7 to 1.43)	0.9946	0.997863	153654	1333	152321	phecode 571.5	digestive
Bladder neck obstruction	OR=1 (0.72 to 1.38)	0.9956	0.997863	150802	1663	149139	phecode 596.1	genitourinary
Cardiac and circulatory congenital anomalies	OR=1 (0.73 to 1.37)	0.9991	0.9991	157211	1753	155458	phecode 747	congenital anomalies
Bolded rows are significant adjusting for multiple hypothesis testing using Bonferroni correction
