# Supplementary material for: Effects of lifelong testosterone exposure on health and disease using Mendelian randomization
Source: eLife. 2020 Oct 16;9:e58914. doi: 10.7554/eLife.58914 (PMC7591257; doi:10.7554/eLife.58914)
Supplement: Supplementary file 1. — Table 1. Characteristics at recruitment for study population of males from UK Biobank cohort study Table 2. Independent genetic variants associated with calculated free testosterone (CFT) at genome-wide significance (p<5×10-8) and not associated with sex hormone-binding globulin in males Table 3. Results of Mendelian randomization analysis using Egger regression for 22 a priori outcomes relevant to testosterone treatment Table 4. Results of Mendelian randomization analysis using MR-RAPS for effect of CFT on 22 a priori outcomes relevant to testosterone treatment Table 5. Results of Mendelian randomization analysis using MR-PRESSO for effect of CFT on 22 a priori outcomes relevant to testosterone treatment Table 6. Associations of genetically-predicted CFT for 439 health outcomes across the human phenome excluding individuals on antihypertensive medication Table 7. Associations of genetically-predicted CFT for 439 health outcomes across the human phenome excluding individuals on cholesterol-lowering medication Table 8. Independent genetic variants associated with total testosterone at genome-wide significance (p<5×10-8) and not associated with sex hormone-binding globulin in 175,421 males from UK Biobank Table 9. All Mendelian randomization analyses of total testosterone on 22 a priori outcomes Table 10. Associations of genetically-predicted total testosterone for 439 health outcomes across the human phenome. Table 11. Definitions for 22 health outcomes with suspected relevance with testosterone treatment Table 12. Definitions for 439 phenome-wide health outcomes Figure 1. Screenshot of options shown to male UK Biobank participants for selection of hair/baldness pattern. [file elife-58914-supp1.xlsx]

## Sheet: Legend
Supplementary File 1 - Table 1. Characteristics at recruitment for study population of males from UK Biobank cohort study
Supplementary File 1 - Table 2. Independent genetic variants associated with calculated free testosterone at genome-wide significance (p<5x10-8) and not associated with sex hormone-binding globulin in males
Supplementary File 1 - Table 3. Results of Mendelian randomization analysis using Egger regression for 22 a priori outcomes relevant to testosterone supplementation
Supplementary File 1 - Table 4. Results of Mendelian randomization analysis using MR-RAPS for effect of calculated free testosterone on 22 a priori outcomes relevant to testosterone supplementation
Supplementary File 1 - Table 5. Results of Mendelian randomization analysis using MR-PRESSO for effect of calculated free testosterone on 22 a priori outcomes relevant to testosterone supplementation
Supplementary File 1 - Table 6. Associations of genetically-predicted calculated free testosterone for 439 health outcomes across the human phenome excluding individuals on antihypertensive medication
Supplementary File 1 - Table 7. Associations of genetically-predicted calculated free testosterone for 439 health outcomes across the human phenome excluding individuals on cholesterol-lowering medication
Supplementary File 1 - Table 8. Independent genetic variants associated with total testosterone at genome-wide significance (p<5x10-8) and not associated with sex hormone-binding globulin in 175,421 males from UK Biobank
Supplementary File 1 - Table 9. All Mendelian randomization analyses of total testosterone on 22 a priori outcomes
Supplementary File 1 - Table 10. Associations of genetically-predicted total testosterone for 439 health outcomes across the human phenome.
Supplementary File 1 - Table 11. Definitions for 22 health outcomes with suspected relevance with testosterone supplementation
Supplementary File 1 - Table 2. Definitions for 439 phenome-wide health outcomes
Supplementary File 1 - Figure 1. Screenshot of options shown to male UK Biobank participants for selection of hair/baldness pattern.

## Sheet: Table 1
Supplementary File 1 - Table 3. Characteristics at recruitment for study population of males from UK Biobank cohort study.
Variable	UK Biobank Males (n=161,268)
Age at Recruitment (years)	57 (8.1)
Townsend Deprivation Index	-1.54 (2.98)
BMI (kg/m2)	27.8 (4.2)
Biochemical Measurements
Total Testosterone (nmol/L)	11.9 (3.7)
Sex Hormone-Binding Globulin (nmol/L)	39.9 (16.7)
Albumin (g/L)	45.5 (2.6)
Calculated Free Testosterone (nmol/L)	0.21 (0.06)
Assessment Centre
Manchester	4435 (2.8%)
Oxford	4299 (2.7%)
Cardiff	6365 (3.9%)
Glasgow	5780 (3.6%)
Edinburgh	5702 (3.5%)
Stoke	7964 (4.9%)
Reading	9529 (5.9%)
Bury	9928 (6.2%)
Newcastle	13185 (8.2%)
Leeds	14794 (9.2%)
Bristol	14305 (8.9%)
Barts	2624 (1.6%)
Nottingham	11418 (7.1%)
Sheffield	10584 (6.6%)
Liverpool	11057 (6.9%)
Middlesborough	7329 (4.5%)
Hounslow	6635 (4.1%)
Croydon	6748 (4.2%)
Birmingham	7611 (4.7%)
Swansea	773 (0.5%)
Wrexham	203 (0.1%)
Values are expressed as mean (± SD) or count (%)
Abbreviations: BMI, body mass index

## Sheet: Table 2
Supplementary File 1 - Table 4. Independent genetic variants associated with calculated free testosterone at genome-wide significance (p<5x10-8) and not associated with sex hormone-binding globulin in males
chr	rsid	position (hg19)	beta	se	effect allele	other allele	eaf	pval	gene	sample size
1	rs72664935	32274901	-0.00115652	0.000197568	T	C	0.423512	4.8e-09	SPOCD1	161268
1	rs6656451	65990422	0.00126205	0.00019476	C	T	0.447159	9.2e-11	LEPR	161268
1	rs41264945	155640115	-0.00245161	0.000422623	C	T	0.9444	6.6e-09	YY1AP1	161268
1	rs12756999	163242095	-0.00129182	0.000225695	C	A	0.757083	1e-08	RGS5	161268
1	rs2421985	172099136	0.00121784	0.000194193	T	C	0.518734	3.6e-10	DNM3	161268
1	rs114654555	204117104	0.00317707	0.000570359	G	T	0.969198	2.5e-08	ETNK2	161268
1	rs35737316	204161534	-0.002454	0.000226269	C	T	0.754298	2.1e-27	KISS1	161268
2	rs17529680	11727087	-0.00172368	0.000213321	G	T	0.706341	6.5e-16	GREB1	161268
2	rs6729954	18286651	-0.00109329	0.000197061	A	T	0.565579	2.9e-08	KCNS3;RDH14	161268
2	rs72862643	31533151	-0.0041783	0.00040198	T	C	0.936546	2.6e-25	EHD3;XDH	161268
2	rs11124268	31951731	-0.00175538	0.000249308	C	A	0.811129	1.9e-12	SRD5A2;LINC01946	161268
2	rs11901448	32096569	-0.00205724	0.000211106	C	T	0.443382	1.9e-22	MEMO1	161268
2	rs7599125	32861555	-0.0011459	0.000197061	A	G	0.546533	6.1e-09	TTC27	161268
2	rs112564689	33377229	-0.00428216	0.00060376	C	G	0.971677	1.3e-12	LTBP1	161268
2	rs144956283	105867819	-0.0012516	0.000197197	A	T	0.504837	2.2e-10	TGFBRAP1	161268
2	rs10192634	180500950	-0.00188946	0.00021891	C	T	0.730254	6.1e-18	ZNF385B	161268
2	rs4233633	234619937	0.00210645	0.000298098	G	C	0.878552	1.6e-12	UGT1A10;UGT1A6;UGT1A7;UGT1A8;UGT1A9	161268
3	rs1112195	24085166	-0.00107527	0.000194985	A	G	0.504586	3.5e-08	NR1D2;LINC00691	161268
3	rs9824196	28807441	-0.0013691	0.000216163	G	T	0.279561	2.4e-10	LINC00693;RBMS3-AS3	161268
3	rs56384446	53796386	0.00133536	0.000199582	A	G	0.613613	2.2e-11	CACNA1D	161268
3	rs35018228	61296301	0.00118913	0.00020508	G	A	0.662128	6.7e-09	FHIT;PTPRG	161268
3	rs7649178	61659697	0.00202539	0.000290254	G	A	0.869288	3e-12	PTPRG	161268
3	rs11425772	88217876	0.00148463	0.000257683	C	CA	0.227884	8.3e-09	C3orf38;EPHA3	161268
3	rs329926	107380821	0.00114501	0.000194405	A	G	0.477284	3.9e-09	BBX	161268
3	rs7626226	138234576	0.00133384	0.000194559	C	T	0.532082	7.1e-12	CEP70	161268
3	rs7610095	152035637	0.0013523	0.000194566	G	A	0.54665	3.6e-12	MBNL1	161268
4	rs78627661	21951413	-0.00284943	0.000324203	G	C	0.899639	1.5e-18	KCNIP4;LOC100505912	161268
4	rs6446913	73891050	0.00133297	0.000221194	G	A	0.739688	1.7e-09	ADAMTS3;COX18	161268
4	rs188539658	103712252	0.00746482	0.000791989	C	T	0.983468	4.3e-21	LOC102723704	161268
4	rs17289915	104491078	0.0114114	0.00087531	C	G	0.987555	7.5e-39	LINC02428;TACR3	161268
4	rs565931739	104590005	0.00282516	0.000267208	C	CA	0.835528	4e-26	TACR3	161268
5	rs72774885	95840231	-0.00148426	0.00026574	T	C	0.834055	2.3e-08	LOC101929710	161268
5	rs950716	135680540	0.00196989	0.000281026	A	G	0.861752	2.4e-12	TRPC7	161268
6	rs7748921	17415517	0.00117164	0.00021109	T	C	0.689715	2.8e-08	CAP2	161268
6	rs1856502	100097384	-0.00176696	0.000194884	T	A	0.545863	1.2e-19	PRDM13;MCHR2	161268
6	rs6902789	105358192	0.00263111	0.00020142	G	A	0.630282	5.4e-39	HACE1;LIN28B-AS1	161268
6	rs3020421	152348122	0.00126685	0.000207368	G	A	0.673585	1e-09	ESR1	161268
7	rs9986829	15019259	-0.00317668	0.000194563	G	A	0.494092	6.3e-60	DGKB;AGMO	161268
7	rs10279715	40870935	0.00134253	0.000195094	A	G	0.538697	5.9e-12	SUGCT	161268
7	rs145359938	78504431	0.00448158	0.000682882	G	C	0.97612	5.3e-11	MAGI2	161268
8	rs7835492	21089517	-0.00164412	0.000274836	T	C	0.853533	2.2e-09	LINC02153;LOC101929172	161268
8	rs7844586	61782304	-0.0018494	0.000225092	T	C	0.250052	2.1e-16	CHD7;LOC100130298	161268
8	rs4507742	77899752	0.00155436	0.000201544	C	T	0.637256	1.2e-14	PEX2	161268
8	rs11985714	113903152	0.00106863	0.000193836	C	T	0.471724	3.5e-08	CSMD3	161268
9	rs72695843	4707078	-0.00222184	0.000395806	A	G	0.930547	2e-08	CDC37L1	161268
9	rs12682723	24958749	0.00120962	0.000196841	G	A	0.570475	8e-10	IZUMO3;TUSC1	161268
9	rs72729232	77104963	-0.00194917	0.000242534	T	G	0.79535	9.2e-16	RORB-AS1	161268
9	rs2090409	108967088	0.00180554	0.000209426	C	A	0.6837	6.6e-18	TMEM38B;MIR8081	161268
9	rs10982156	117088064	-0.00301926	0.00039588	T	A	0.930196	2.4e-14	ORM1	161268
10	rs7912521	67262089	-0.00364757	0.000196355	T	C	0.584775	5e-77	LOC101928887;LINC01515	161268
10	rs28613899	101723615	0.00116127	0.000196165	G	C	0.564558	3.2e-09	DNMBP	161268
10	rs200372827	104890340	-0.00118394	0.000204818	T	TA	0.388156	7.5e-09	NT5C2	161268
10	rs41313485	135055101	-0.00314977	0.000551838	G	A	0.967799	1.1e-08	VENTX	161268
11	rs2957688	10364963	0.00117011	0.000194498	G	A	0.525908	1.8e-09	CAND1.11	161268
11	rs11389722	28077708	0.00109855	0.000199958	G	GT	0.512273	3.9e-08	KIF18A	161268
11	rs139807436	28728766	0.00364754	0.000642166	A	C	0.97648	1.3e-08	MIR8068;LINC01616	161268
11	rs567203	28743701	0.00188976	0.000210418	T	C	0.322223	2.7e-19	MIR8068;LINC01616	161268
11	rs142521478	29068121	0.00563151	0.000597802	G	A	0.97246	4.5e-21	MIR8068;LINC01616	161268
11	rs35381476	29309284	0.00198221	0.000222401	C	CT	0.739057	5e-19	MIR8068;LINC01616	161268
11	rs1148889	29595806	0.00381383	0.000690375	G	T	0.978858	3.3e-08	MIR8068;LINC01616	161268
11	rs11604034	72364147	0.00160767	0.000263203	G	C	0.83681	1e-09	PDE2A	161268
11	rs12796488	94131557	0.00335382	0.000253327	C	A	0.822631	5.2e-40	GPR83	161268
11	rs4938576	118746769	-0.0011608	0.000197032	T	G	0.412134	3.8e-09	DDX6;CXCR5	161268
11	rs10892924	122773715	-0.00235011	0.000196852	A	T	0.432693	7.5e-33	C11orf63	161268
11	rs7110039	122834001	0.00115913	0.000195891	T	C	0.431714	3.3e-09	C11orf63;BSX	161268
11	rs634554	125070392	0.00135912	0.000210621	C	A	0.307898	1.1e-10	PKNOX2	161268
12	rs4765999	2945970	-0.00189413	0.000213685	C	T	0.667557	7.7e-19	LOC100507424	161268
12	rs3819886	3001009	-0.00240219	0.000242092	C	G	0.797778	3.3e-23	TULP3	161268
12	rs10082968	3099291	-0.00610549	0.000497229	G	A	0.959868	1.2e-34	TEAD4	161268
12	rs141773786	57475601	0.00215732	0.000315149	A	G	0.894233	7.6e-12	NEMP1;NAB2	161268
12	rs12810788	116196322	0.0017971	0.000247224	G	A	0.200893	3.6e-13	TBX3;MED13L	161268
12	rs6486542	130952209	0.00149134	0.000197246	C	T	0.571834	4e-14	RIMBP2	161268
13	rs1555589	100480664	0.00113999	0.000206426	G	A	0.339922	3.3e-08	LOC101927437	161268
13	rs2038695	100559123	0.00140954	0.000196567	C	A	0.448692	7.5e-13	LOC101927437	161268
13	rs3742223	112725196	0.00258589	0.000331349	T	C	0.903002	6e-15	LINC00403	161268
14	rs1254269	60843017	-0.00160195	0.000211389	G	A	0.697585	3.5e-14	LINC02322;C14orf39	161268
14	rs1812755	90007637	0.00195686	0.000245822	T	C	0.800636	1.7e-15	FOXN3	161268
15	rs61733869	50769520	-0.00259028	0.000456664	G	A	0.952644	1.4e-08	USP8	161268
15	rs6493485	51498587	0.00147	0.00025997	G	T	0.170512	1.6e-08	MIR4713HG	161268
15	rs6493487	51513729	0.00245918	0.000223153	G	A	0.254886	3.1e-28	MIR4713HG	161268
15	rs12914625	57263440	-0.00133989	0.000194563	C	T	0.465123	5.7e-12	TCF12	161268
15	rs35663835	60758053	-0.00154911	0.000282181	C	T	0.863424	4e-08	ICE2	161268
16	rs2764772	20060653	-0.00212306	0.000205968	T	A	0.66624	6.5e-25	GPR139	161268
16	rs74752114	28618068	0.00161209	0.000247323	G	A	0.726971	7.1e-11	SULT1A1	161268
16	rs62041532	73922719	-0.00132087	0.000237453	T	G	0.787396	2.7e-08	LINC01568;LOC101928035	161268
17	rs4542712	7469327	-0.00183165	0.000253428	T	C	0.820606	4.9e-13	SENP3-EIF4A1	161268
17	rs2696641	43651550	-0.00133515	0.000218602	G	C	0.47503	1e-09	LRRC37A4P;MAPK8IP1P2	161268
17	rs8076703	75612643	0.00142743	0.000212375	C	T	0.296899	1.8e-11	LOC100507351;LINC01987	161268
18	rs2668776	44750365	0.00180533	0.000194781	C	T	0.469877	1.9e-20	SKOR2	161268
19	rs55662444	48388635	-0.00132029	0.000199165	A	G	0.584603	3.4e-11	SULT2A1	161268
20	rs2327121	8878250	-0.00117669	0.000204743	G	C	0.344029	9.1e-09	PLCB1;PLCB4	161268
20	rs7265992	33525407	0.00163794	0.000256339	G	A	0.821354	1.7e-10	GSS	161268
22	rs6009583	49677646	-0.00241547	0.000219574	C	T	0.732891	3.8e-28	LINC01310;NONE	161268
Effect size (beta and standard error) in nmol/L of calculated free testosterone per copy of effect allele
Abbreviations: Chr, chromosome; rsID, rs identifier; SE, standard error; eaf, effect allele frequency; pval, p-value

## Sheet: Table 3
Supplementary File 1 - Table 5. Results of Mendelian randomization analysis using Egger regression for 22 a priori outcomes relevant to testosterone supplementation
Outcome	P-value for Egger intercept	Effect using MR Egger (95% CI)	P-value
Haematocrit percentage	0.08343	0.874 % (0.265 to 1.483)	0.00598622
Body fat-free percentage	0.3311	1.409 % (0.323 to 2.495)	0.0126828
Body fat percentage	0.2781	-1.332656 % (-2.414 to -0.251)	0.0177191
Heel bone mineral density	0.3737	0.5473823 SD (0.183 to 0.912)	0.0040983
Prostate cancer	0.7855	OR = 1.62 (0.94 to 2.79)	0.0874731
Androgenic alopecia	0.5888	OR = 1.72 (0.98 to 3.01)	0.0632494
Benign prostatic hyperplasia	0.9413	OR = 1.38 (0.82 to 2.33)	0.225289
Depression	0.659	OR = 1.26 (0.64 to 2.5)	0.510577
Myocardial infarction	0.2075	OR = 1.69 (0.99 to 2.89)	0.0560987
Accelerometer-based physical activity	0.8766	1.06 milligravity (-1.286 to 3.4)	0.378733
Glucose	0.9559	-0.059 mmol/L (-0.26 to 0.142)	0.566129
Hemoglobin A1c	0.6774	-0.101 mmol/mol (-1.316 to 1.113)	0.87038
All stroke	0.3662	OR = 0.88 (0.44 to 1.76)	0.724749
All fracture	0.411	OR = 1.1 (0.63 to 1.92)	0.732947
Handgrip strength	0.4637	-0.224 kg (-1.725 to 1.278)	0.770943
Diastolic blood pressure	0.9079	0.4 mmHg (-1.095 to 1.799)	0.634753
All dementia	0.602	OR = 0.86 (0.18 to 4.09)	0.848514
Ischemic stroke	0.3465	OR = 0.59 (0.21 to 1.61)	0.301601
Systolic blood pressure	0.08535	2.1 mmHg (-0.632 to 4.892)	0.134048
Type 2 diabetes	0.9467	OR = 1.04 (0.59 to 1.84)	0.897952
Venous thromboembolism	0.0632	OR = 0.51 (0.23 to 1.12)	0.0961465
Heart failure	0.5671	OR = 0.83 (0.41 to 1.7)	0.617711

## Sheet: Table 4
Supplementary File 1 - Table 6. Results of Mendelian randomization analysis using MR-RAPS for effect of calculated free testosterone on 22 a priori outcomes relevant to testosterone supplementation
Outcome	Effect using MR RAPS (95% CI)	P-value
Haematocrit percentage	1.31 % (1.04 to 1.58)	2.11114e-21
Body fat-free percentage	1.97 % (1.506 to 2.434)	7.76474e-17
Body fat percentage	-1.95 % (-2.412 to -1.488)	1.28488e-16
Heel bone mineral density	0.441 SD (0.308 to 0.574)	8.68381e-11
Prostate cancer	OR = 1.53 (1.21 to 1.92)	0.000286318
Androgenic alopecia	OR = 1.65 (1.32 to 2.06)	1.05189e-05
Benign prostatic hyperplasia	OR = 1.42 (1.14 to 1.77)	0.00162617
Depression	OR = 1.45 (1.09 to 1.93)	0.0112287
Myocardial infarction	OR = 1.30 (1.04 to 1.61)	0.0195037
Accelerometer-based physical activity	0.929 milligravity (0.004 to 1.854)	0.0490788
Glucose	-0.022 mmol/L (-0.091 to 0.046)	0.524359
Hemoglobin A1c	-0.209 mmol/L (-0.648 to 0.23)	0.351112
All stroke	OR = 1.22 (0.92 to 1.64)	0.170683
All fracture	OR = 0.91 (0.71 to 1.15)	0.417956
Handgrip strength	0.17 kg (-0.446 to 0.786)	0.589773
Diastolic blood pressure	0.384 mmHg (-0.195 to 0.963)	0.193789
All dementia	OR = 1.11 (0.59 to 2.1)	0.741293
Ischemic stroke	OR = 0.92 (0.6 to 1.4)	0.689517
Systolic blood pressure	0.267 mmHg (-0.892 to 1.426)	0.651254
Type 2 diabetes	OR = 1.08 (0.85 to 1.38)	0.529134
Venous thromboembolism	OR = 0.97 (0.69 to 1.36)	0.867114
Heart failure	OR = 0.98 (0.73 to 1.32)	0.89274
Abbreviations: CFT, calculated free testosterone; P, p-value; CI, confidence interval

## Sheet: Table 5
Supplementary File 1 - Table 7. Results of Mendelian randomization analysis using MR-PRESSO for effect of calculated free testosterone on 22 a priori outcomes relevant to testosterone supplementation
7	Global Test P-value	Effect using MR PRESSO (95% CI)	P-value	Distortion Test P-value
Haematocrit percentage	0.0001	1.394 % (1.182 to 1.606)	7.031e-22	0.8365
Body fat-free percentage	0.0001	1.917 % (1.538 to 2.296)	5.516e-16	0.9539
Body fat percentage	0.0001	-1.897 % (-2.272 to -1.522)	5.277e-16	0.9469
Heel bone mineral density	0.0001	0.4912 SD (0.38 to 0.602)	2.05e-13	0.1588
Androgenic alopecia	0.0001	OR = 1.79 (1.55 to 2.06)	2.45e-12	0.1359
Glucose	0.0001	-0.02062 mmol/L (-0.083 to 0.041)	0.516	0.0639
Hemoglobin A1c	0.0001	-0.2206 mmol/mol (-0.607 to 0.166)	0.2665	0.2268
Handgrip strength	0.0001	0.1428 kg (-0.423 to 0.709)	0.622	0.294
Systolic blood pressure	0.0001	0.1665 mmHg (-0.843 to 1.176)	0.7474	0.1588
Type 2 diabetes	0.0001	OR = 1.11 (0.9 to 1.39)	0.3342	0.6741
Diastolic blood pressure	0.0038	0.441 mmHg (-0.064 to 0.946)	0.09072	0.6254
Benign prostatic hyperplasia	0.026	OR = 1.4 (1.15 to 1.7)	0.001151	0.7902
All fracture	0.0723	NA	NA	NA
Venous thromboembolism	0.0805	NA	NA	NA
Myocardial infarction	0.0951	NA	NA	NA
All dementia	0.1866	NA	NA	NA
Accelerometer-based physical activity	0.2249	NA	NA	NA
Prostate cancer	0.4305	NA	NA	NA
Heart failure	0.4893	NA	NA	NA
Ischemic stroke	0.6653	NA	NA	NA
All stroke	0.8287	NA	NA	NA
Depression	0.8484	NA	NA	NA
a Distortion test evaluates significant differences in the causal estimates before and after correction for outliers
b Global test evaluates overall horizontal pleiotropy among all genetic variants
Abbreviations: CFT, calculated free testosterone; P, p-value; CI, confidence interval

## Sheet: Table 6
Supplementary File 1 - Table 8. Associations of genetically-predicted calculated free testosterone for 439 health outcomes across the human phenome excluding individuals on antihypertensive medication
Trait	Effect per 0.1 nmol/L increase CFT (95% CI)	P-value	FDR-adjusted p-value	Sample Size	Number of Cases	Number of Controls	Phecode (if applicable)	Category
Creatinine	0.118 (0.081 to 0.155)	3.192e-10	1.40767e-07	112976	NA	NA	NA	biomarker
Apolipoprotein A	-0.021 (-0.031 to -0.012)	4.998e-06	0.00110206	104233	NA	NA	NA	biomarker
HDL cholesterol	-0.083 (-0.123 to -0.044)	3.578e-05	0.00482123	104382	NA	NA	NA	biomarker
C-reactive protein	-0.081 (-0.12 to -0.042)	4.373e-05	0.00482123	112768	NA	NA	NA	biomarker
Other symptoms involving abdomen and pelvis	OR=2.15 (1.41 to 3.29)	0.0003955	0.0348831	112195	963	111232	phecode 579	digestive
Umbilical hernia	OR=1.73 (1.26 to 2.39)	0.0008123	0.043218	101505	1690	99815	phecode 550.4	digestive
Spinal stenosis	OR=1.96 (1.32 to 2.91)	0.0008405	0.043218	115676	1112	114564	phecode 720	musculoskeletal
Fasciitis	OR=0.6 (0.44 to 0.81)	0.0008575	0.043218	110722	1947	108775	phecode 728.7	musculoskeletal
Albumin	-0.17 (-0.27 to -0.07)	0.000882	0.043218	104429	NA	NA	NA	biomarker
Contracture of palmar fascia Dupuytrens disease	OR=0.6 (0.44 to 0.81)	0.001118	0.0493038	110604	1829	108775	phecode 728.71	musculoskeletal
Total protein	-0.26 (-0.42 to -0.1)	0.001428	0.0533242	104299	NA	NA	NA	biomarker
Phosphate	-0.011 (-0.017 to -0.004)	0.001451	0.0533242	104211	NA	NA	NA	biomarker
Abdominal hernia	OR=1.19 (1.07 to 1.32)	0.001588	0.0538698	118535	18720	99815	phecode 550	digestive
IGF1	0.322 (0.12 to 0.524)	0.00176	0.05544	112446	NA	NA	NA	biomarker
Unspecified monoarthritis	OR=1.31 (1.1 to 1.55)	0.002213	0.0650622	112557	6314	106243	phecode 716.2	musculoskeletal
Inguinal hernia	OR=1.24 (1.08 to 1.42)	0.002582	0.0711664	109916	10101	99815	phecode 550.1	digestive
Calcium	-0.005 (-0.009 to -0.002)	0.00319	0.0827524	104386	NA	NA	NA	biomarker
Hypotension	OR=0.63 (0.46 to 0.86)	0.003899	0.0934259	113978	1823	112155	phecode 458	circulatory system
Disorders of muscle; ligament; and fascia	OR=0.66 (0.49 to 0.88)	0.004109	0.0934259	110944	2169	108775	phecode 728	musculoskeletal
Spondylosis and allied disorders	OR=1.54 (1.14 to 2.06)	0.004237	0.0934259	116588	2024	114564	phecode 721	musculoskeletal
Arthropathy NOS	OR=1.21 (1.06 to 1.38)	0.004651	0.097671	117337	11094	106243	phecode 716.9	musculoskeletal
Back pain	OR=1.36 (1.1 to 1.69)	0.005475	0.106116	118535	3745	114790	phecode 760	symptoms
Other arthropathies	OR=1.21 (1.06 to 1.38)	0.005627	0.106116	117366	11123	106243	phecode 716	musculoskeletal
Other disorders of intestine	OR=1.29 (1.08 to 1.55)	0.005775	0.106116	113894	5615	108279	phecode 569	digestive
Symptoms involving head and neck	OR=1.7 (1.16 to 2.5)	0.006247	0.110197	118535	1185	117350	phecode 293	mental disorders
Hypotension NOS	OR=0.63 (0.45 to 0.88)	0.00711	0.119005	113732	1577	112155	phecode 458.9	circulatory system
Inflammatory diseases of prostate	OR=1.55 (1.12 to 2.13)	0.007286	0.119005	38517	1831	36686	phecode 601	genitourinary
Degenerative skin conditions and other dermatoses	OR=0.65 (0.48 to 0.9)	0.008598	0.135418	117429	1778	115651	phecode 702	dermatologic
Hemiplegia	OR=0.44 (0.23 to 0.83)	0.01121	0.170469	112321	439	111882	phecode 342	neurological
Delirium dementia and amnestic and other cognitive disorders	OR=1.7 (1.11 to 2.62)	0.01507	0.221529	116902	948	115954	phecode 290	mental disorders
Osteoarthrosis	OR=1.22 (1.04 to 1.43)	0.01597	0.226013	118535	7314	111221	phecode 740	musculoskeletal
Alkaline phosphatase	-0.047 (-0.085 to -0.009)	0.0164	0.226013	113050	NA	NA	NA	biomarker
Internal derangement of knee	OR=1.23 (1.04 to 1.47)	0.0179	0.234508	117744	6027	111717	phecode 835	injuries and poisonings
Urethral stricture not specified as infectious	OR=1.58 (1.08 to 2.3)	0.01808	0.234508	114490	1217	113273	phecode 597.1	genitourinary
GERD	OR=1.21 (1.03 to 1.42)	0.01896	0.238896	112426	7371	105055	phecode 530.11	digestive
Mitral valve disease	OR=0.6 (0.39 to 0.92)	0.0202	0.24745	114991	969	114022	phecode 394.2	circulatory system
Prostatitis	OR=1.65 (1.08 to 2.54)	0.02115	0.252085	37682	996	36686	phecode 601.1	genitourinary
Chronic bronchitis	OR=1.34 (1.04 to 1.72)	0.02351	0.253626	112084	2819	109265	phecode 496.2	respiratory
Other disorders of peritoneum	OR=1.66 (1.07 to 2.57)	0.02372	0.253626	109183	904	108279	phecode 568	digestive
Obstructive chronic bronchitis	OR=1.34 (1.04 to 1.73)	0.02385	0.253626	112022	2757	109265	phecode 496.21	respiratory
Lipoma	OR=1.37 (1.04 to 1.8)	0.02389	0.253626	118243	2364	115879	phecode 214	neoplasms
Convulsions	OR=1.69 (1.07 to 2.68)	0.02467	0.253626	112698	816	111882	phecode 345.3	neurological
Personal history of diseases of digestive system	OR=1.24 (1.03 to 1.49)	0.02473	0.253626	102744	5389	97355	phecode 564.9	digestive
Sleep apnea	OR=1.44 (1.04 to 2)	0.02666	0.26362	118221	1647	116574	phecode 327.3	neurological
Total bilirubin	0.044 (0.005 to 0.083)	0.0269	0.26362	112560	NA	NA	NA	biomarker
Other disorders of urethra and urinary tract	OR=1.49 (1.04 to 2.13)	0.0287	0.275146	114644	1371	113273	phecode 597	genitourinary
Functional digestive disorders	OR=1.18 (1.02 to 1.36)	0.02948	0.27661	106299	8944	97355	phecode 564	digestive
Allergyoradverse effect of penicillin	OR=1.27 (1.02 to 1.58)	0.03065	0.281597	115509	3800	111709	phecode 960.2	injuries and poisonings
Duodenitis	OR=1.32 (1.02 to 1.7)	0.03364	0.30276	111801	2746	109055	phecode 535.6	digestive
Seborrheic keratosis	OR=0.64 (0.42 to 0.97)	0.03487	0.306452	117756	999	116757	phecode 702.2	dermatologic
Cancer; suspected or other	OR=1.17 (1.01 to 1.36)	0.03544	0.306452	114819	9023	105796	phecode 195	neoplasms
Malignant neoplasm; other	OR=1.17 (1.01 to 1.36)	0.03747	0.312444	114600	8804	105796	phecode 195.1	neoplasms
Fracture of lower limb	OR=0.73 (0.54 to 0.98)	0.03755	0.312444	114322	1927	112395	phecode 800	injuries and poisonings
Other peripheral nerve disorders	OR=1.33 (1.01 to 1.75)	0.03943	0.322012	116930	2354	114576	phecode 351	neurological
Noninfectious gastroenteritis	OR=1.26 (1.01 to 1.58)	0.0414	0.331953	100910	3555	97355	phecode 558	digestive
Diseases of the oral soft tissues; excluding lesions specific for gingiva and tongue	OR=1.47 (1.01 to 2.15)	0.04371	0.343438	118093	1226	116867	phecode 528	digestive
Osteoarthritis; localized	OR=1.22 (1.01 to 1.49)	0.04439	0.343438	115940	4719	111221	phecode 740.1	musculoskeletal
Peritoneal adhesions postoperative postinfection	OR=1.58 (1.01 to 2.49)	0.04707	0.357894	109128	849	108279	phecode 568.1	digestive
Nonrheumatic mitral valve disorders	OR=0.65 (0.42 to 1)	0.04816	0.359976	114977	955	114022	phecode 395.1	circulatory system
Other symptomsordisorders or the urinary system	OR=1.17 (1 to 1.36)	0.04948	0.36068	118535	7961	110574	phecode 599	genitourinary
Intestinal infection	OR=1.29 (1 to 1.65)	0.04989	0.36068	118535	2807	115728	phecode 008	infectious diseases
Hemorrhage of gastrointestinal tract	OR=1.34 (1 to 1.8)	0.05317	0.362015	113245	2013	111232	phecode 578.9	digestive
Essential hypertension	OR=1.12 (1 to 1.27)	0.05348	0.362015	118245	14230	104015	phecode 401.1	circulatory system
Visual disturbances	OR=0.66 (0.43 to 1.01)	0.05476	0.362015	118535	950	117585	phecode 368	sense organs
Gastrointestinal hemorrhage	OR=1.18 (1 to 1.39)	0.05494	0.362015	117762	6530	111232	phecode 578	digestive
Retinal detachments and defects	OR=0.7 (0.48 to 1.01)	0.055	0.362015	115816	1276	114540	phecode 361	sense organs
Retinal detachment with retinal defect	OR=0.7 (0.48 to 1.01)	0.055	0.362015	115816	1276	114540	phecode 361.1	sense organs
Abal findings examination of lungs	OR=1.54 (0.99 to 2.42)	0.05733	0.371802	118535	866	117669	phecode 514	respiratory
Osteoarthrosis NOS	OR=1.26 (0.99 to 1.6)	0.06096	0.376454	114295	3074	111221	phecode 740.9	musculoskeletal
Open wounds of head; neck; and trunk	OR=1.37 (0.99 to 1.91)	0.06128	0.376454	116186	1605	114581	phecode 870	injuries and poisonings
Osteoporosis	OR=0.61 (0.36 to 1.03)	0.06263	0.376454	118196	638	117558	phecode 743.1	musculoskeletal
Osteoporosis NOS	OR=0.61 (0.36 to 1.03)	0.06263	0.376454	118196	638	117558	phecode 743.11	musculoskeletal
Poisoning by antibiotics	OR=1.22 (0.99 to 1.5)	0.06268	0.376454	115843	4134	111709	phecode 960	injuries and poisonings
Hypertension	OR=1.12 (0.99 to 1.26)	0.06337	0.376454	118315	14300	104015	phecode 401	circulatory system
Benign neoplasm of colon	OR=1.16 (0.99 to 1.36)	0.06484	0.376454	98910	7577	91333	phecode 208	neoplasms
Other local infections of skin and subcutaneous tissue	OR=0.73 (0.52 to 1.02)	0.06494	0.376454	116217	1549	114668	phecode 686	dermatologic
Other diseases of the teeth and supporting structures	OR=1.54 (0.97 to 2.46)	0.06573	0.376454	116306	806	115500	phecode 525	digestive
Fracture of upper limb	OR=0.77 (0.59 to 1.02)	0.06675	0.377394	114769	2374	112395	phecode 803	injuries and poisonings
Symptoms involving digestive system	OR=1.22 (0.99 to 1.51)	0.06829	0.381214	101357	4002	97355	phecode 561	digestive
Intestinal obstruction without mention of hernia	OR=1.41 (0.97 to 2.05)	0.07258	0.400097	98600	1245	97355	phecode 560	digestive
Acute pulmonary heart disease	OR=1.36 (0.97 to 1.92)	0.07656	0.411743	117556	1491	116065	phecode 415.1	circulatory system
Pulmonary embolism and infarction; acute	OR=1.36 (0.97 to 1.92)	0.07656	0.411743	117556	1491	116065	phecode 415.11	circulatory system
Sciatica	OR=1.62 (0.95 to 2.78)	0.07759	0.412255	118066	596	117470	phecode 764	symptoms
Fracture of unspecified part of femur	OR=0.62 (0.37 to 1.06)	0.07926	0.416115	113013	618	112395	phecode 800.2	injuries and poisonings
Chronic airway obstruction	OR=1.23 (0.97 to 1.54)	0.08343	0.432854	112693	3428	109265	phecode 496	respiratory
Abality of gait	OR=0.66 (0.4 to 1.06)	0.08762	0.44541	118128	751	117377	phecode 350.2	neurological
Other disorders of prostate	OR=1.53 (0.94 to 2.5)	0.08936	0.44541	37448	762	36686	phecode 602	genitourinary
Malignant neoplasm of other and ill defined sites within the digestive organs and peritoneum	OR=1.28 (0.96 to 1.71)	0.08942	0.44541	92351	2158	90193	phecode 159	neoplasms
Poisoning by primarily systemic agents	OR=1.53 (0.94 to 2.51)	0.08989	0.44541	112422	713	111709	phecode 963	injuries and poisonings
Esophagitis; GERD and related diseases	OR=1.13 (0.98 to 1.29)	0.09116	0.446684	115274	10219	105055	phecode 530.1	digestive
Diseases of esophagus	OR=1.12 (0.98 to 1.27)	0.09553	0.462953	116340	11285	105055	phecode 530	digestive
Right bundle branch block	OR=0.65 (0.39 to 1.09)	0.1018	0.487976	109854	668	109186	phecode 426.31	circulatory system
Appendiceal conditions	OR=0.73 (0.49 to 1.07)	0.1034	0.490316	118535	1180	117355	phecode 540	digestive
Fracture of radius and ulna	OR=0.72 (0.49 to 1.07)	0.1052	0.493545	113535	1140	112395	phecode 803.2	injuries and poisonings
Abdominal pain	OR=1.12 (0.97 to 1.3)	0.1079	0.49783	118535	9247	109288	phecode 785	symptoms
Other diseases of blood and blood forming organs	OR=1.34 (0.94 to 1.91)	0.1088	0.49783	117523	1373	116150	phecode 289	hematopoietic
Sleep disorders	OR=1.28 (0.95 to 1.72)	0.1095	0.49783	118535	1961	116574	phecode 327	neurological
Other disorders of stomach and duodenum	OR=1.27 (0.95 to 1.69)	0.1108	0.4986	111171	2116	109055	phecode 537	digestive
Nausea and vomiting	OR=0.81 (0.63 to 1.05)	0.1141	0.506932	118535	2648	115887	phecode 789	symptoms
Lipoma of skin and subcutaneous tissue	OR=1.3 (0.94 to 1.81)	0.1156	0.506932	117475	1596	115879	phecode 214.1	neoplasms
Diaphragmatic hernia	OR=1.13 (0.97 to 1.32)	0.1161	0.506932	107545	7730	99815	phecode 550.2	digestive
Hypercholesterolemia	OR=1.12 (0.97 to 1.3)	0.1249	0.5334	117796	8894	108902	phecode 272.11	endocrine metabolic
Secondary malignancy of lymph nodes	OR=1.32 (0.93 to 1.88)	0.1258	0.5334	107187	1391	105796	phecode 198.1	neoplasms
Precordial pain	OR=0.73 (0.48 to 1.09)	0.1266	0.5334	111190	1049	110141	phecode 418.1	circulatory system
Anal and rectal conditions	OR=1.15 (0.96 to 1.39)	0.127	0.5334	113627	5348	108279	phecode 565	digestive
Asthma	OR=1.13 (0.96 to 1.34)	0.1334	0.554994	116058	6793	109265	phecode 495	respiratory
Appendicitis	OR=0.74 (0.5 to 1.1)	0.1367	0.557053	118493	1138	117355	phecode 540.1	digestive
Pulmonary heart disease	OR=1.28 (0.92 to 1.78)	0.1396	0.557053	117694	1629	116065	phecode 415	circulatory system
Vitamin D	0.029 (-0.01 to 0.069)	0.1418	0.557053	109121	NA	NA	NA	biomarker
Other mental disorder	OR=1.1 (0.97 to 1.26)	0.1429	0.557053	116299	11056	105243	phecode 306	mental disorders
Hemorrhoids	OR=1.13 (0.96 to 1.32)	0.143	0.557053	114575	7274	107301	phecode 455	circulatory system
Other biliary tract disease	OR=1.37 (0.9 to 2.09)	0.1432	0.557053	116054	980	115074	phecode 575	digestive
Cholelithiasis	OR=1.21 (0.94 to 1.57)	0.1435	0.557053	117744	2670	115074	phecode 574.1	digestive
Cystatin C	0.026 (-0.009 to 0.061)	0.144	0.557053	113043	NA	NA	NA	biomarker
Open wounds of extremities	OR=1.23 (0.93 to 1.64)	0.1455	0.557961	116772	2191	114581	phecode 871	injuries and poisonings
Chronic liver disease and cirrhosis	OR=0.74 (0.49 to 1.11)	0.1506	0.57254	116576	1057	115519	phecode 571	digestive
Varicose veins	OR=1.2 (0.93 to 1.56)	0.1602	0.597388	109984	2683	107301	phecode 454	circulatory system
Osteoporosis; osteopenia and pathological fracture	OR=0.74 (0.48 to 1.13)	0.1609	0.597388	118535	977	117558	phecode 743	musculoskeletal
Hyperlipidemia	OR=1.11 (0.96 to 1.28)	0.1612	0.597388	118499	9597	108902	phecode 272.1	endocrine metabolic
Erythematous conditions	OR=1.48 (0.85 to 2.56)	0.1652	0.602821	117331	571	116760	phecode 695	dermatologic
Direct bilirubin	0.029 (-0.012 to 0.069)	0.1654	0.602821	104780	NA	NA	NA	biomarker
Anxiety disorder	OR=1.25 (0.91 to 1.71)	0.1683	0.608363	107024	1781	105243	phecode 300.1	mental disorders
Altered mental status	OR=1.37 (0.87 to 2.16)	0.1708	0.610643	116803	849	115954	phecode 292.4	mental disorders
Tachycardia NOS	OR=0.7 (0.43 to 1.16)	0.1717	0.610643	109882	696	109186	phecode 427.7	circulatory system
Disorders of mineral metabolism	OR=0.72 (0.45 to 1.15)	0.1735	0.612108	118535	795	117740	phecode 275	endocrine metabolic
Acute appendicitis	OR=0.75 (0.49 to 1.14)	0.1779	0.620872	118342	987	117355	phecode 540.11	digestive
Transient cerebral ischemia	OR=0.69 (0.4 to 1.19)	0.1788	0.620872	116037	585	115452	phecode 433.31	circulatory system
Frequency of urination and polyuria	OR=1.28 (0.89 to 1.85)	0.1829	0.622374	111873	1299	110574	phecode 599.5	genitourinary
Gout	OR=1.27 (0.89 to 1.8)	0.1842	0.622374	118327	1412	116915	phecode 274.1	endocrine metabolic
Disorders of lipoid metabolism	OR=1.1 (0.96 to 1.27)	0.1853	0.622374	118535	9633	108902	phecode 272	endocrine metabolic
Alanine aminotransferase	0.026 (-0.012 to 0.064)	0.1859	0.622374	112973	NA	NA	NA	biomarker
Osteoarthrosis; localized; primary	OR=1.2 (0.91 to 1.58)	0.1873	0.622374	113566	2345	111221	phecode 740.11	musculoskeletal
Anxiety disorders	OR=1.22 (0.91 to 1.64)	0.1877	0.622374	107239	1996	105243	phecode 300	mental disorders
Epistaxis or throat hemorrhage	OR=0.72 (0.43 to 1.19)	0.1979	0.640577	112820	687	112133	phecode 477	respiratory
Urinary obstruction	OR=1.31 (0.87 to 1.99)	0.1984	0.640577	111579	1005	110574	phecode 599.1	genitourinary
Septal DeviationsorTurbinate Hypertrophy	OR=1.22 (0.9 to 1.64)	0.1987	0.640577	114089	1956	112133	phecode 470	respiratory
Otitis media and Eustachian tube disorders	OR=1.41 (0.83 to 2.38)	0.199	0.640577	118010	632	117378	phecode 381	sense organs
Cough	OR=1.34 (0.85 to 2.1)	0.2029	0.648398	115742	855	114887	phecode 512.8	respiratory
Spondylosis without myelopathy	OR=1.27 (0.88 to 1.83)	0.206	0.653568	115849	1285	114564	phecode 721.1	musculoskeletal
Cholesterol	-0.027 (-0.068 to 0.015)	0.2092	0.65898	113057	NA	NA	NA	biomarker
Nasal polyps	OR=1.25 (0.88 to 1.77)	0.2122	0.659033	113558	1425	112133	phecode 471	respiratory
Renal colic	OR=0.74 (0.45 to 1.19)	0.2132	0.659033	116134	750	115384	phecode 594.8	genitourinary
Other abal blood chemistry	OR=1.16 (0.92 to 1.48)	0.2137	0.659033	118472	3111	115361	phecode 790.6	symptoms
Other chronic nonalcoholic liver disease	OR=0.74 (0.45 to 1.19)	0.2153	0.659356	116263	744	115519	phecode 571.5	digestive
Gout and other crystal arthropathies	OR=1.23 (0.89 to 1.71)	0.217	0.659979	118535	1620	116915	phecode 274	endocrine metabolic
Urate	1.651 (-0.991 to 4.293)	0.2205	0.663288	112907	NA	NA	NA	biomarker
Hypothyroidism NOS	OR=1.23 (0.88 to 1.72)	0.2223	0.663288	118123	1556	116567	phecode 244.4	endocrine metabolic
Unspecified diffuse connective tissue disease	OR=0.73 (0.44 to 1.21)	0.2226	0.663288	110331	693	109638	phecode 709.7	dermatologic
Dermatitis due to solar radiation	OR=0.77 (0.5 to 1.18)	0.2301	0.669646	117504	948	116556	phecode 938	dermatologic
Type 1 diabetes	OR=0.71 (0.4 to 1.25)	0.2303	0.669646	114372	543	113829	phecode 250.1	endocrine metabolic
Blood in stool	OR=1.31 (0.84 to 2.06)	0.2318	0.669646	112099	867	111232	phecode 578.2	digestive
Secondary malignant neoplasm	OR=1.16 (0.91 to 1.49)	0.2336	0.669646	108697	2901	105796	phecode 198	neoplasms
Esophageal bleeding varicesorhemorrhage	OR=0.72 (0.42 to 1.23)	0.2341	0.669646	105667	612	105055	phecode 530.2	digestive
Colon cancer	OR=1.25 (0.86 to 1.8)	0.2359	0.669646	92581	1310	91271	phecode 153.2	neoplasms
Other disorders of bladder	OR=1.14 (0.92 to 1.42)	0.2369	0.669646	117067	3794	113273	phecode 596	genitourinary
Nonspecific findings on examination of blood	OR=1.15 (0.91 to 1.46)	0.2371	0.669646	118535	3174	115361	phecode 790	symptoms
Other disorders of soft tissues	OR=0.84 (0.62 to 1.13)	0.2384	0.669646	110770	1995	108775	phecode 729	musculoskeletal
Tobacco use disorder	OR=1.1 (0.94 to 1.3)	0.2462	0.680948	114482	6822	107660	phecode 318	mental disorders
Candidiasis	OR=1.35 (0.81 to 2.24)	0.2475	0.680948	118324	672	117652	phecode 112	infectious diseases
Chronic dermatitis due to solar radiation	OR=0.77 (0.5 to 1.2)	0.2486	0.680948	117472	916	116556	phecode 938.2	dermatologic
Chronic ulcer of skin	OR=1.34 (0.81 to 2.22)	0.2486	0.680948	118535	695	117840	phecode 707	dermatologic
Colorectal cancer	OR=1.19 (0.88 to 1.61)	0.2536	0.690356	93261	1990	91271	phecode 153	neoplasms
Actinic keratosis	OR=0.77 (0.49 to 1.21)	0.2597	0.700491	117622	865	116757	phecode 702.1	dermatologic
Malignant neoplasm of rectum; rectosigmoid junction; and anus	OR=1.27 (0.84 to 1.93)	0.2605	0.700491	92272	1001	91271	phecode 153.3	neoplasms
Cholelithiasis with other cholecystitis	OR=1.27 (0.84 to 1.92)	0.2642	0.701881	116076	1002	115074	phecode 574.12	digestive
Hemorrhage of rectum and anus	OR=1.13 (0.91 to 1.41)	0.2745	0.71943	114886	3654	111232	phecode 578.8	digestive
Fracture of ankle and foot	OR=0.75 (0.44 to 1.26)	0.2754	0.71943	113027	632	112395	phecode 801	injuries and poisonings
Other acute and subacute forms of ischemic heart disease	OR=1.36 (0.78 to 2.37)	0.2757	0.71943	109619	564	109055	phecode 411.9	circulatory system
Other open wound of head and face	OR=1.22 (0.85 to 1.73)	0.2796	0.71962	115967	1386	114581	phecode 870.3	injuries and poisonings
Bundle branch block	OR=0.81 (0.55 to 1.19)	0.2815	0.71962	110368	1182	109186	phecode 426.3	circulatory system
Epilepsy; recurrent seizures; convulsions	OR=1.19 (0.87 to 1.64)	0.2819	0.71962	113604	1722	111882	phecode 345	neurological
Hypothyroidism	OR=1.2 (0.86 to 1.66)	0.2823	0.71962	118205	1638	116567	phecode 244	endocrine metabolic
Staphylococcus infections	OR=0.8 (0.54 to 1.2)	0.2884	0.724181	114982	1076	113906	phecode 041.1	infectious diseases
Diffuse diseases of connective tissue	OR=0.77 (0.48 to 1.25)	0.2898	0.724181	110396	758	109638	phecode 709	dermatologic
Benign neoplasm of other parts of digestive system	OR=1.21 (0.85 to 1.72)	0.2906	0.724181	118535	1406	117129	phecode 211	neoplasms
Electrolyte imbalance	OR=1.22 (0.84 to 1.77)	0.2916	0.724181	117411	1266	116145	phecode 276.1	endocrine metabolic
Respiratory abalities	OR=1.14 (0.89 to 1.46)	0.2923	0.724181	118535	2888	115647	phecode 513	respiratory
Cardiac conduction disorders	OR=0.87 (0.66 to 1.13)	0.2949	0.726541	111671	2485	109186	phecode 426	circulatory system
Edema	OR=0.74 (0.41 to 1.33)	0.3144	0.77028	118486	510	117976	phecode 782.3	symptoms
Cancer of bladder	OR=0.82 (0.55 to 1.21)	0.3172	0.771992	117852	1129	116723	phecode 189.2	neoplasms
Cholecystitis without cholelithiasis	OR=0.77 (0.46 to 1.29)	0.3186	0.771992	115718	644	115074	phecode 574.3	digestive
Malaise and fatigue	OR=1.25 (0.8 to 1.96)	0.3212	0.774039	118535	869	117666	phecode 798	symptoms
Other non epithelial cancer of skin	OR=1.09 (0.92 to 1.28)	0.3252	0.777829	117363	6884	110479	phecode 172.2	neoplasms
Diseases of white blood cells	OR=1.21 (0.83 to 1.78)	0.3263	0.777829	117326	1176	116150	phecode 288	hematopoietic
Effects radiation NOS	OR=1.21 (0.83 to 1.77)	0.3292	0.779179	117516	1219	116297	phecode 990	injuries and poisonings
Redundant prepuce and phimosisorBXO	OR=1.17 (0.85 to 1.61)	0.3304	0.779179	108070	1735	106335	phecode 604.1	genitourinary
Dizziness and giddiness Light headedness and vertigo	OR=1.2 (0.83 to 1.73)	0.3373	0.790783	118129	1303	116826	phecode 386.9	sense organs
Postoperative infection	OR=1.2 (0.82 to 1.76)	0.3396	0.790783	118226	1207	117019	phecode 080	infectious diseases
Rheumatoid arthritis and other inflammatory polyarthropathies	OR=1.24 (0.8 to 1.91)	0.3407	0.790783	118535	921	117614	phecode 714	musculoskeletal
Other hypertrophic and atrophic conditions of skin	OR=1.2 (0.82 to 1.74)	0.3468	0.798928	118500	1247	117253	phecode 701	dermatologic
Peripheral enthesopathies and allied syndromes	OR=1.1 (0.9 to 1.35)	0.3497	0.798928	113228	4453	108775	phecode 726	musculoskeletal
Symptoms involving skin and other integumentary tissue	OR=0.77 (0.44 to 1.34)	0.3521	0.798928	118535	559	117976	phecode 782	symptoms
Abal heart sounds	OR=0.89 (0.68 to 1.15)	0.3561	0.798928	116683	2661	114022	phecode 396	circulatory system
Circulatory disease NEC	OR=0.91 (0.75 to 1.11)	0.3566	0.798928	117066	4911	112155	phecode 459.9	circulatory system
Bacterial enteritis	OR=1.26 (0.77 to 2.06)	0.3571	0.798928	116448	720	115728	phecode 008.5	infectious diseases
Disorders of fluid; electrolyte; and acid base balance	OR=1.14 (0.87 to 1.49)	0.3582	0.798928	118535	2390	116145	phecode 276	endocrine metabolic
Degeneration of intervertebral disc	OR=0.8 (0.49 to 1.29)	0.3598	0.798928	115316	752	114564	phecode 722.6	musculoskeletal
Musculoskeletal symptoms referable to limbs	OR=0.85 (0.6 to 1.2)	0.3618	0.798928	118535	1472	117063	phecode 771	symptoms
Diseases of pancreas	OR=1.23 (0.79 to 1.91)	0.3637	0.798928	118535	888	117647	phecode 577	digestive
Superficial injury without mention of infection	OR=1.15 (0.85 to 1.56)	0.3651	0.798928	118344	1870	116474	phecode 915	injuries and poisonings
Alcohol related disorders	OR=1.09 (0.91 to 1.31)	0.3676	0.798928	113106	5446	107660	phecode 317	mental disorders
Swelling of limb	OR=0.84 (0.58 to 1.22)	0.3726	0.798928	118335	1272	117063	phecode 771.1	symptoms
Other derangement of joint	OR=1.23 (0.78 to 1.95)	0.3728	0.798928	117323	825	116498	phecode 742.9	musculoskeletal
Complication due to other implant and internal device	OR=1.2 (0.8 to 1.81)	0.3753	0.798928	112474	1046	111428	phecode 859	injuries and poisonings
Ventral hernia	OR=1.19 (0.8 to 1.77)	0.3799	0.798928	100943	1128	99815	phecode 550.5	digestive
Skin cancer	OR=1.07 (0.92 to 1.25)	0.3802	0.798928	118484	8005	110479	phecode 172	neoplasms
Acquired foot deformities	OR=0.83 (0.54 to 1.27)	0.3805	0.798928	117328	961	116367	phecode 735	musculoskeletal
Nonspecific chest pain	OR=1.07 (0.92 to 1.24)	0.3807	0.798928	118535	8394	110141	phecode 418	circulatory system
Varicose veins of lower extremity	OR=1.13 (0.86 to 1.48)	0.3825	0.798928	109731	2430	107301	phecode 454.1	circulatory system
Reflux esophagitis	OR=1.1 (0.88 to 1.38)	0.3828	0.798928	108635	3580	105055	phecode 530.14	digestive
Rheumatic disease of the heart valves	OR=0.87 (0.63 to 1.2)	0.3858	0.798928	115707	1685	114022	phecode 394	circulatory system
Carbuncle and furuncle	OR=0.82 (0.51 to 1.3)	0.388	0.798928	115480	812	114668	phecode 686.1	dermatologic
Occlusion of cerebral arteries	OR=1.17 (0.82 to 1.68)	0.3885	0.798928	116803	1351	115452	phecode 433.2	circulatory system
Localized superficial swelling; mass; or lump	OR=1.27 (0.74 to 2.2)	0.3895	0.798928	116996	575	116421	phecode 687.2	dermatologic
Alcoholism	OR=1.1 (0.88 to 1.37)	0.3928	0.801967	111466	3806	107660	phecode 317.1	mental disorders
First degree AV block	OR=0.76 (0.4 to 1.44)	0.3958	0.804368	109614	428	109186	phecode 426.21	circulatory system
Gamma glutamyltransferase	0.017 (-0.022 to 0.056)	0.3994	0.805882	112976	NA	NA	NA	biomarker
Atrial fibrillation and flutter	OR=1.08 (0.9 to 1.31)	0.4002	0.805882	114508	5322	109186	phecode 427.2	circulatory system
Cholelithiasis and cholecystitis	OR=1.11 (0.87 to 1.41)	0.4067	0.813356	118095	3021	115074	phecode 574	digestive
Other disorders of circulatory system	OR=0.92 (0.76 to 1.12)	0.4076	0.813356	117126	4971	112155	phecode 459	circulatory system
Enthesopathy	OR=1.11 (0.86 to 1.43)	0.4179	0.828436	111530	2755	108775	phecode 726.1	musculoskeletal
Other specified cardiac dysrhythmias	OR=0.86 (0.59 to 1.25)	0.4201	0.828436	110432	1246	109186	phecode 427.3	circulatory system
Hypertensive heart andoror renal disease	OR=0.68 (0.26 to 1.77)	0.4261	0.828436	104204	189	104015	phecode 401.2	circulatory system
Other disorders of eyelids	OR=1.15 (0.82 to 1.62)	0.4285	0.828436	117280	1502	115778	phecode 374	sense organs
Abal movement	OR=0.85 (0.58 to 1.26)	0.4291	0.828436	118535	1158	117377	phecode 350	neurological
Rheumatoid arthritis	OR=1.2 (0.76 to 1.91)	0.4319	0.828436	118535	819	117716	phecode 714.1	musculoskeletal
Gastritis and duodenitis	OR=1.06 (0.91 to 1.23)	0.432	0.828436	117526	8471	109055	phecode 535	digestive
Renal failure	OR=1.11 (0.86 to 1.43)	0.4335	0.828436	117464	2729	114735	phecode 585	genitourinary
Bladder neck obstruction	OR=1.17 (0.78 to 1.76)	0.4347	0.828436	114351	1078	113273	phecode 596.1	genitourinary
Nonrheumatic aortic valve disorders	OR=1.2 (0.76 to 1.88)	0.435	0.828436	114888	866	114022	phecode 395.2	circulatory system
Hydronephrosis	OR=1.21 (0.75 to 1.94)	0.4362	0.828436	116163	779	115384	phecode 595	genitourinary
Ileostomy status	OR=1.23 (0.73 to 2.08)	0.4377	0.828436	97985	630	97355	phecode 559	digestive
Thrombocytopenia	OR=1.24 (0.71 to 2.17)	0.4475	0.842758	118204	561	117643	phecode 287.3	hematopoietic
Melanomas of skin	OR=1.15 (0.8 to 1.67)	0.451	0.842758	111739	1260	110479	phecode 172.11	neoplasms
Melanomas of skin; dx or hx	OR=1.15 (0.8 to 1.67)	0.451	0.842758	111739	1260	110479	phecode 172.1	neoplasms
Retention of urine	OR=1.09 (0.87 to 1.37)	0.4567	0.849809	114014	3440	110574	phecode 599.2	genitourinary
Congenital anomalies of great vessels	OR=1.23 (0.71 to 2.13)	0.4592	0.850871	118201	577	117624	phecode 747.13	congenital anomalies
Bacterial infection NOS	OR=1.09 (0.87 to 1.36)	0.4698	0.861871	117439	3533	113906	phecode 041	infectious diseases
Constipation	OR=1.1 (0.85 to 1.42)	0.4698	0.861871	100132	2777	97355	phecode 563	digestive
Disorders of penis	OR=1.11 (0.83 to 1.48)	0.471	0.861871	108440	2105	106335	phecode 604	genitourinary
Aortic valve disease	OR=1.25 (0.68 to 2.3)	0.4737	0.86323	114487	465	114022	phecode 394.3	circulatory system
Diseases of the larynx and vocal cords	OR=1.19 (0.74 to 1.91)	0.4779	0.863788	112898	765	112133	phecode 473	respiratory
Ulcer of esophagus	OR=1.12 (0.82 to 1.51)	0.48	0.863788	106980	1925	105055	phecode 530.12	digestive
Respiratory failure	OR=1.18 (0.74 to 1.89)	0.4813	0.863788	114970	799	114171	phecode 509.1	respiratory
Poisoning by analgesics; antipyretics; and antirheumatics	OR=1.13 (0.8 to 1.6)	0.4819	0.863788	113167	1458	111709	phecode 965	injuries and poisonings
Other and unspecified disc disorder	OR=1.13 (0.8 to 1.59)	0.4907	0.863788	116033	1469	114564	phecode 722.9	musculoskeletal
Neurological disorders	OR=1.12 (0.81 to 1.54)	0.4934	0.863788	117694	1740	115954	phecode 292	mental disorders
Pericarditis	OR=0.82 (0.45 to 1.47)	0.4972	0.863788	117883	500	117383	phecode 420.2	circulatory system
Complications of transplants and reattached limbs	OR=1.07 (0.89 to 1.28)	0.5002	0.863788	116695	5267	111428	phecode 851	injuries and poisonings
Other specified peripheral vascular diseases	OR=1.16 (0.76 to 1.77)	0.5006	0.863788	116771	959	115812	phecode 443.8	circulatory system
Other headache syndromes	OR=0.9 (0.67 to 1.22)	0.5011	0.863788	118153	1970	116183	phecode 339	neurological
Hemoptysis	OR=0.88 (0.62 to 1.27)	0.5018	0.863788	118471	1348	117123	phecode 516.1	respiratory
Orthostatic hypotension	OR=0.81 (0.45 to 1.49)	0.5038	0.863788	112639	484	112155	phecode 458.1	circulatory system
E coli	OR=1.19 (0.72 to 1.97)	0.5059	0.863788	114588	682	113906	phecode 041.4	infectious diseases
Shortness of breath	OR=0.89 (0.64 to 1.25)	0.5092	0.863788	116495	1608	114887	phecode 512.7	respiratory
Degeneration of macula and posterior pole of retina	OR=1.19 (0.7 to 2.03)	0.5099	0.863788	78616	632	77984	phecode 362.2	sense organs
Macular degeneration senile of retina NOS	OR=1.19 (0.7 to 2.03)	0.5099	0.863788	78616	632	77984	phecode 362.29	sense organs
Fracture of vertebral column without mention of spinal cord injury	OR=0.84 (0.51 to 1.4)	0.5123	0.863788	113076	681	112395	phecode 805	injuries and poisonings
Neoplasm of uncertain behavior	OR=0.87 (0.57 to 1.33)	0.5142	0.863788	106777	981	105796	phecode 199	neoplasms
Respiratory insufficiency	OR=1.18 (0.72 to 1.93)	0.5142	0.863788	114887	716	114171	phecode 509.2	respiratory
Superficial cellulitis and abscess	OR=1.09 (0.84 to 1.42)	0.5173	0.863788	117208	2540	114668	phecode 681	dermatologic
Heart valve disorders	OR=0.9 (0.66 to 1.23)	0.5183	0.863788	115898	1876	114022	phecode 395	circulatory system
Lymphadenitis	OR=1.16 (0.74 to 1.81)	0.5199	0.863788	117015	865	116150	phecode 289.4	hematopoietic
Irritable Bowel Syndrome	OR=0.87 (0.57 to 1.33)	0.5232	0.863788	98350	995	97355	phecode 564.1	digestive
Other inflammatory spondylopathies	OR=1.19 (0.7 to 2.01)	0.5269	0.863788	118535	622	117913	phecode 715	musculoskeletal
Other intestinal obstruction	OR=1.14 (0.75 to 1.74)	0.5302	0.863788	98343	988	97355	phecode 560.4	digestive
Other disorders of bone and cartilage	OR=0.88 (0.59 to 1.31)	0.5304	0.863788	116154	1083	115071	phecode 733	musculoskeletal
Hypovolemia	OR=1.14 (0.75 to 1.75)	0.5327	0.863788	117120	975	116145	phecode 276.5	endocrine metabolic
Hemorrhage or hematoma complicating a procedure	OR=1.12 (0.78 to 1.61)	0.5328	0.863788	112760	1332	111428	phecode 850	injuries and poisonings
Diabetic retinopathy	OR=1.29 (0.57 to 2.93)	0.5374	0.863788	78245	261	77984	phecode 250.7	endocrine metabolic
Malignant neoplasm of bladder	OR=0.87 (0.57 to 1.34)	0.5379	0.863788	117689	966	116723	phecode 189.21	neoplasms
Fracture of clavicle or scapula	OR=0.87 (0.55 to 1.36)	0.5403	0.863788	113261	866	112395	phecode 803.3	injuries and poisonings
Calculus of kidney	OR=1.12 (0.77 to 1.63)	0.5407	0.863788	116649	1265	115384	phecode 594.1	genitourinary
Cystitis and urethritis	OR=1.17 (0.7 to 1.95)	0.5427	0.863788	111086	667	110419	phecode 592	genitourinary
Paroxysmal supraventricular tachycardia	OR=0.85 (0.51 to 1.43)	0.5437	0.863788	109843	657	109186	phecode 427.11	circulatory system
Fracture of tibia and fibula	OR=0.86 (0.53 to 1.4)	0.5493	0.863788	113121	726	112395	phecode 800.3	injuries and poisonings
Diverticulosis	OR=1.05 (0.9 to 1.22)	0.5511	0.863788	105829	8474	97355	phecode 562.1	digestive
Diverticulosis and diverticulitis	OR=1.05 (0.9 to 1.22)	0.5511	0.863788	105829	8474	97355	phecode 562	digestive
Triglycerides	0.012 (-0.027 to 0.051)	0.5528	0.863788	112940	NA	NA	NA	biomarker
Other diseases of respiratory system; not elsewhere classified	OR=1.08 (0.84 to 1.37)	0.5538	0.863788	118535	3039	115496	phecode 519	respiratory
Other disorders of arteries and arterioles	OR=0.82 (0.43 to 1.57)	0.5568	0.863788	116228	416	115812	phecode 447	circulatory system
Disorders of refraction and accommodation; blindness and low vision	OR=1.14 (0.74 to 1.76)	0.5595	0.863788	118535	929	117606	phecode 367	sense organs
Pain in joint	OR=1.09 (0.82 to 1.45)	0.5606	0.863788	118535	2153	116382	phecode 745	musculoskeletal
Obesity	OR=0.93 (0.72 to 1.2)	0.5643	0.863788	118514	2780	115734	phecode 278.1	endocrine metabolic
Atrioventricular AV block	OR=0.87 (0.55 to 1.38)	0.5674	0.863788	110025	839	109186	phecode 426.2	circulatory system
Occlusion and stenosis of precerebral arteries	OR=1.21 (0.62 to 2.37)	0.5686	0.863788	115841	389	115452	phecode 433.1	circulatory system
Aortic aneurysm	OR=1.17 (0.68 to 2)	0.5697	0.863788	116417	605	115812	phecode 442.1	circulatory system
Nerve root and plexus disorders	OR=1.11 (0.77 to 1.59)	0.5721	0.863788	115922	1346	114576	phecode 353	neurological
Cardiac pacemaker in situ	OR=1.15 (0.71 to 1.84)	0.5732	0.863788	109969	783	109186	phecode 426.91	circulatory system
Derangement of joint; non traumatic	OR=1.13 (0.74 to 1.72)	0.5732	0.863788	117471	973	116498	phecode 742	musculoskeletal
Secondary malignancy of bone	OR=1.14 (0.73 to 1.78)	0.5739	0.863788	106680	884	105796	phecode 198.6	neoplasms
Overweight; obesity and other hyperalimentation	OR=0.93 (0.72 to 1.2)	0.5781	0.86715	118535	2801	115734	phecode 278	endocrine metabolic
Symptoms involving nervous and musculoskeletal systems	OR=1.08 (0.81 to 1.45)	0.5876	0.878165	118535	2068	116467	phecode 781	symptoms
Gastric ulcer	OR=0.9 (0.61 to 1.32)	0.5926	0.878165	117419	1176	116243	phecode 531.2	digestive
Other specified gastritis	OR=0.93 (0.71 to 1.22)	0.593	0.878165	111426	2371	109055	phecode 535.8	digestive
Senile cataract	OR=0.93 (0.71 to 1.22)	0.5946	0.878165	115154	2515	112639	phecode 366.2	sense organs
Chemotherapy	OR=1.05 (0.87 to 1.28)	0.5954	0.878165	110590	4794	105796	phecode 197	neoplasms
Chronic renal failure CKD	OR=1.11 (0.75 to 1.66)	0.6002	0.880404	115832	1097	114735	phecode 585.3	genitourinary
Acute pancreatitis	OR=1.15 (0.68 to 1.95)	0.6016	0.880404	118273	626	117647	phecode 577.1	digestive
Dislocation	OR=1.13 (0.72 to 1.76)	0.6054	0.880404	112578	861	111717	phecode 830	injuries and poisonings
Urinary tract infection	OR=1.07 (0.84 to 1.35)	0.6065	0.880404	113538	3119	110419	phecode 591	genitourinary
Inflammation of eyelids	OR=1.13 (0.71 to 1.79)	0.6069	0.880404	116595	817	115778	phecode 371.3	sense organs
Apolipoprotein B	0.002 (-0.007 to 0.011)	0.6126	0.883874	112313	NA	NA	NA	biomarker
Pain in limb	OR=1.09 (0.78 to 1.53)	0.6133	0.883874	118535	1521	117014	phecode 773	symptoms
Peripheral vascular disease; unspecified	OR=1.13 (0.69 to 1.85)	0.6243	0.895483	116539	727	115812	phecode 443.9	circulatory system
Chronic sinusitis	OR=1.12 (0.71 to 1.78)	0.6261	0.895483	112939	806	112133	phecode 475	respiratory
Viral infection	OR=1.13 (0.69 to 1.83)	0.6286	0.895483	117630	733	116897	phecode 079	infectious diseases
Pneumonia	OR=1.05 (0.85 to 1.3)	0.6327	0.895483	118432	3989	114443	phecode 480	respiratory
Iron deficiency anemias	OR=0.93 (0.69 to 1.25)	0.6339	0.895483	115914	2000	113914	phecode 280	hematopoietic
Iron deficiency anemias; unspecified or not due to blood loss	OR=0.93 (0.69 to 1.25)	0.6339	0.895483	115914	2000	113914	phecode 280.1	hematopoietic
Ganglion and cyst of synovium; tendon; and bursa	OR=0.89 (0.54 to 1.46)	0.6375	0.895483	109467	692	108775	phecode 727.4	musculoskeletal
Unstable angina intermediate coronary syndrome	OR=1.1 (0.73 to 1.66)	0.6376	0.895483	110113	1058	109055	phecode 411.1	circulatory system
Aspartate aminotransferase	0.009 (-0.029 to 0.048)	0.6415	0.896095	112601	NA	NA	NA	biomarker
LDL direct	-0.008 (-0.039 to 0.024)	0.6421	0.896095	112819	NA	NA	NA	biomarker
Other disorders of testis	OR=0.92 (0.65 to 1.31)	0.6447	0.896885	107732	1397	106335	phecode 603	genitourinary
Complication of internal orthopedic device	OR=1.08 (0.76 to 1.54)	0.6612	0.916483	112841	1413	111428	phecode 858	injuries and poisonings
Other disorders of the kidney and ureters	OR=1.09 (0.73 to 1.64)	0.664	0.916483	115814	1079	114735	phecode 586	genitourinary
Disturbance of skin sensation	OR=1.11 (0.69 to 1.77)	0.6654	0.916483	117209	788	116421	phecode 687.4	dermatologic
Atopicorcontact dermatitis due to other or unspecified	OR=1.12 (0.67 to 1.86)	0.6671	0.916483	117229	673	116556	phecode 939	dermatologic
Cardiac pacemakerordevice in situ	OR=1.1 (0.7 to 1.74)	0.6736	0.921365	110035	849	109186	phecode 426.9	circulatory system
Inflammatory bowel disease and other gastroenteritis and colitis	OR=1.08 (0.76 to 1.51)	0.6759	0.921365	98852	1497	97355	phecode 555	digestive
Other disorders of eye	OR=1.08 (0.74 to 1.59)	0.6783	0.921365	117591	1188	116403	phecode 379	sense organs
Psoriasis vulgaris	OR=1.12 (0.65 to 1.91)	0.6798	0.921365	109225	603	108622	phecode 696.41	dermatologic
Paroxysmal tachycardia; unspecified	OR=0.91 (0.59 to 1.4)	0.6811	0.921365	110132	946	109186	phecode 427.1	circulatory system
Other retinal disorders	OR=1.08 (0.75 to 1.56)	0.684	0.921529	79312	1328	77984	phecode 362	sense organs
Abal sputum	OR=0.93 (0.65 to 1.32)	0.6854	0.921529	118535	1412	117123	phecode 516	respiratory
Purpura and other hemorrhagic conditions	OR=1.11 (0.66 to 1.88)	0.6937	0.924905	118276	633	117643	phecode 287	hematopoietic
Hematuria	OR=1.04 (0.86 to 1.25)	0.694	0.924905	115639	5220	110419	phecode 593	genitourinary
Fever of unknown origin	OR=1.08 (0.74 to 1.56)	0.6958	0.924905	118535	1277	117258	phecode 783	symptoms
Peripheral vascular disease	OR=1.09 (0.72 to 1.65)	0.6963	0.924905	116826	1014	115812	phecode 443	circulatory system
Cardiac congenital anomalies	OR=1.09 (0.69 to 1.73)	0.7047	0.933251	118458	834	117624	phecode 747.1	congenital anomalies
Other anemias	OR=0.95 (0.74 to 1.22)	0.709	0.934631	116809	2895	113914	phecode 285	hematopoietic
Other disorders of male genital organs	OR=0.94 (0.69 to 1.29)	0.7103	0.934631	108144	1809	106335	phecode 608	genitourinary
Synovitis and tenosynovitis	OR=1.07 (0.75 to 1.51)	0.7121	0.934631	110231	1456	108775	phecode 727.1	musculoskeletal
Cancer of urinary organs incl kidney and bladder	OR=0.94 (0.69 to 1.29)	0.7199	0.940452	118535	1812	116723	phecode 189	neoplasms
Other diseases of respiratory system; NEC	OR=1.05 (0.82 to 1.34)	0.7208	0.940452	118346	2850	115496	phecode 519.8	respiratory
Streptococcus infection	OR=0.9 (0.51 to 1.61)	0.7243	0.940757	114425	519	113906	phecode 041.2	infectious diseases
Inflammation of the eye	OR=1.08 (0.71 to 1.64)	0.7253	0.940757	116764	986	115778	phecode 371	sense organs
Sepsis	OR=0.93 (0.63 to 1.38)	0.7324	0.944411	118535	1144	117391	phecode 994.2	injuries and poisonings
Sepsis and SIRS	OR=0.93 (0.63 to 1.38)	0.7324	0.944411	118535	1144	117391	phecode 994	injuries and poisonings
Decreased white blood cell count	OR=1.07 (0.7 to 1.64)	0.7393	0.946503	117121	971	116150	phecode 288.1	hematopoietic
Neutropenia	OR=1.07 (0.7 to 1.64)	0.7393	0.946503	117121	971	116150	phecode 288.11	hematopoietic
Carditis	OR=0.92 (0.57 to 1.49)	0.7426	0.946503	118145	762	117383	phecode 420	circulatory system
Diseases of hair and hair follicles	OR=0.95 (0.69 to 1.3)	0.7462	0.946503	118220	1726	116494	phecode 704	dermatologic
Angina pectoris	OR=0.97 (0.79 to 1.19)	0.7464	0.946503	113465	4410	109055	phecode 411.3	circulatory system
Heart valve replaced	OR=1.11 (0.59 to 2.08)	0.7469	0.946503	114462	440	114022	phecode 395.6	circulatory system
Vertiginous syndromes and other disorders of vestibular system	OR=1.05 (0.76 to 1.45)	0.7507	0.948592	118535	1709	116826	phecode 386	sense organs
Sebaceous cyst	OR=1.04 (0.8 to 1.35)	0.7535	0.94941	118283	2608	115675	phecode 706.2	dermatologic
Emphysema	OR=1.08 (0.65 to 1.79)	0.757	0.950781	109953	688	109265	phecode 496.1	respiratory
Diabetes mellitus	OR=0.97 (0.8 to 1.18)	0.7589	0.950781	118535	4706	113829	phecode 250	endocrine metabolic
Urinary calculus	OR=0.96 (0.74 to 1.24)	0.7642	0.954709	118049	2665	115384	phecode 594	genitourinary
Atherosclerosis	OR=1.1 (0.57 to 2.13)	0.7717	0.958072	116215	403	115812	phecode 440	circulatory system
Other abality of urination	OR=1.07 (0.65 to 1.77)	0.7765	0.958072	111278	704	110574	phecode 599.9	genitourinary
Other chronic ischemic heart disease; unspecified	OR=0.98 (0.84 to 1.14)	0.7786	0.958072	116939	7884	109055	phecode 411.8	circulatory system
Diseases of sebaceous glands	OR=1.04 (0.8 to 1.34)	0.7789	0.958072	118300	2625	115675	phecode 706	dermatologic
Fracture of hand or wrist	OR=0.95 (0.66 to 1.37)	0.7801	0.958072	113709	1314	112395	phecode 804	injuries and poisonings
Cancer of other lymphoid; histiocytic tissue	OR=0.94 (0.62 to 1.43)	0.7816	0.958072	117624	1006	116618	phecode 202	neoplasms
Bronchiectasis	OR=1.08 (0.62 to 1.89)	0.7821	0.958072	109829	564	109265	phecode 496.3	respiratory
Phlebitis and thrombophlebitis of lower extremities	OR=1.05 (0.73 to 1.51)	0.7883	0.962279	108653	1352	107301	phecode 451.2	circulatory system
Fracture of ribs	OR=0.94 (0.58 to 1.52)	0.7913	0.962279	113146	751	112395	phecode 807	injuries and poisonings
Leukemia	OR=1.06 (0.67 to 1.69)	0.7928	0.962279	117429	811	116618	phecode 204	neoplasms
Cardiac dysrhythmias	OR=1.02 (0.88 to 1.19)	0.798	0.962279	117352	8166	109186	phecode 427	circulatory system
Symptoms affecting skin	OR=1.04 (0.78 to 1.39)	0.798	0.962279	118535	2114	116421	phecode 687	dermatologic
Hereditary retinal dystrophies	OR=1.11 (0.51 to 2.43)	0.7992	0.962279	78268	284	77984	phecode 362.7	sense organs
Glaucoma	OR=1.04 (0.75 to 1.45)	0.8031	0.962279	116158	1618	114540	phecode 365	sense organs
Abal findings on examination of urine	OR=1.04 (0.73 to 1.48)	0.8085	0.962279	118535	1419	117116	phecode 598	genitourinary
Symptoms and disorders of the joints	OR=1.05 (0.71 to 1.55)	0.8092	0.962279	117639	1141	116498	phecode 741	musculoskeletal
Non Hodgkins lymphoma	OR=0.95 (0.6 to 1.5)	0.8096	0.962279	117444	826	116618	phecode 202.2	neoplasms
Benign neoplasm of unspecified sites	OR=0.94 (0.56 to 1.56)	0.8113	0.962279	118535	668	117867	phecode 229	neoplasms
Pleurisy; pleural effusion	OR=1.03 (0.79 to 1.36)	0.8135	0.962279	116570	2399	114171	phecode 507	respiratory
Ischemic Heart Disease	OR=0.98 (0.85 to 1.14)	0.8139	0.962279	118315	9260	109055	phecode 411	circulatory system
Skull and face fracture and other intercranial injury	OR=1.04 (0.74 to 1.47)	0.8206	0.966681	118535	1465	117070	phecode 819	injuries and poisonings
Secondary malignant neoplasm of liver	OR=0.95 (0.62 to 1.46)	0.8235	0.966681	106763	967	105796	phecode 198.4	neoplasms
Cardiomegaly	OR=0.95 (0.62 to 1.47)	0.8242	0.966681	116993	928	116065	phecode 416	circulatory system
Other aneurysm	OR=1.05 (0.65 to 1.71)	0.8282	0.966954	116560	748	115812	phecode 442	circulatory system
Urinary incontinence	OR=0.95 (0.59 to 1.52)	0.8296	0.966954	111356	782	110574	phecode 599.4	genitourinary
Intervertebral disc disorders	OR=1.03 (0.77 to 1.39)	0.8337	0.966954	116539	1975	114564	phecode 722	musculoskeletal
Complications of cardiacorvascular device; implant; and graft	OR=1.05 (0.64 to 1.74)	0.8371	0.966954	112127	699	111428	phecode 854	injuries and poisonings
Peptic ulcer excl esophageal	OR=1.03 (0.78 to 1.36)	0.8388	0.966954	118535	2292	116243	phecode 531	digestive
Degenerative disease of the spinal cord	OR=1.05 (0.64 to 1.73)	0.8396	0.966954	112579	697	111882	phecode 334	neurological
Abal results of function study of liver	OR=1.04 (0.7 to 1.54)	0.8422	0.966954	116659	1140	115519	phecode 573.7	digestive
Secondary malignancy of respiratory organs	OR=1.05 (0.66 to 1.67)	0.8463	0.966954	106607	811	105796	phecode 198.2	neoplasms
Cancer of bronchus; lung	OR=0.96 (0.62 to 1.48)	0.8481	0.966954	118327	922	117405	phecode 165.1	neoplasms
Cancer within the respiratory system	OR=1.04 (0.7 to 1.54)	0.8493	0.966954	118523	1118	117405	phecode 165	neoplasms
Other acquired deformities of limbs	OR=1.05 (0.62 to 1.8)	0.8501	0.966954	116967	600	116367	phecode 736	musculoskeletal
Syncope and collapse	OR=0.98 (0.77 to 1.25)	0.8539	0.966954	118535	2972	115563	phecode 788	symptoms
Phlebitis and thrombophlebitis	OR=1.03 (0.73 to 1.47)	0.8547	0.966954	108740	1439	107301	phecode 451	circulatory system
Cerebrovascular disease	OR=1.02 (0.79 to 1.33)	0.8554	0.966954	118107	2655	115452	phecode 433	circulatory system
Other disorders of biliary tract	OR=1.05 (0.61 to 1.8)	0.8627	0.966954	115665	591	115074	phecode 575.8	digestive
Benign neoplasm of skin	OR=0.98 (0.73 to 1.3)	0.8632	0.966954	118364	2131	116233	phecode 216	neoplasms
Left bundle branch block	OR=1.05 (0.58 to 1.9)	0.8634	0.966954	109688	502	109186	phecode 426.32	circulatory system
Aphakia and other disorders of lens	OR=1.05 (0.6 to 1.84)	0.8639	0.966954	116962	559	116403	phecode 379.3	sense organs
Cerebral artery occlusion; with cerebral infarction	OR=1.05 (0.61 to 1.78)	0.8688	0.968307	116065	613	115452	phecode 433.21	circulatory system
Other symptoms of respiratory system	OR=0.98 (0.79 to 1.23)	0.8695	0.968307	118535	3648	114887	phecode 512	respiratory
Calculus of bile duct	OR=0.96 (0.54 to 1.68)	0.8774	0.970957	115620	546	115074	phecode 574.2	digestive
Acute upper respiratory infections of multiple or unspecified sites	OR=0.96 (0.56 to 1.64)	0.8814	0.970957	118493	602	117891	phecode 465	respiratory
Other disorders of synovium; tendon; and bursa	OR=1.02 (0.79 to 1.32)	0.8819	0.970957	111503	2728	108775	phecode 727	musculoskeletal
Cataract	OR=0.99 (0.82 to 1.18)	0.8826	0.970957	118535	5896	112639	phecode 366	sense organs
Stricture and stenosis of esophagus	OR=1.04 (0.65 to 1.66)	0.8831	0.970957	105849	794	105055	phecode 530.3	digestive
Abdominal aortic aneurysm	OR=0.95 (0.49 to 1.86)	0.8862	0.970957	116201	389	115812	phecode 442.11	circulatory system
Anal and rectal polyp	OR=1.02 (0.79 to 1.31)	0.8919	0.970957	111137	2858	108279	phecode 565.1	digestive
Cellulitis and abscess of armorhand	OR=0.98 (0.73 to 1.32)	0.8976	0.970957	116649	1981	114668	phecode 681.3	dermatologic
Cellulitis and abscess of foot; toe	OR=0.98 (0.73 to 1.32)	0.8976	0.970957	116649	1981	114668	phecode 681.6	dermatologic
Cellulitis and abscess of leg; except foot	OR=0.98 (0.73 to 1.32)	0.8976	0.970957	116649	1981	114668	phecode 681.5	dermatologic
Cerebral ischemia	OR=0.98 (0.67 to 1.42)	0.8978	0.970957	116678	1226	115452	phecode 433.3	circulatory system
Other disorders of liver	OR=0.98 (0.76 to 1.28)	0.8983	0.970957	118088	2569	115519	phecode 573	digestive
Ulcerative colitis	OR=1.02 (0.69 to 1.52)	0.9045	0.975268	98472	1117	97355	phecode 555.2	digestive
Hydrocele	OR=1.03 (0.65 to 1.61)	0.9141	0.979104	107190	855	106335	phecode 603.1	genitourinary
Lipoprotein A	0.002 (-0.041 to 0.046)	0.9151	0.979104	90248	NA	NA	NA	biomarker
Pulmonary collapse; interstitial and compensatory emphysema	OR=0.98 (0.61 to 1.56)	0.9204	0.979104	114965	794	114171	phecode 508	respiratory
Palpitations	OR=0.98 (0.61 to 1.56)	0.9206	0.979104	109968	782	109186	phecode 427.9	circulatory system
Hearing loss	OR=0.98 (0.71 to 1.36)	0.9239	0.979104	118518	1665	116853	phecode 389	sense organs
Substance addiction and disorders	OR=0.99 (0.76 to 1.29)	0.9261	0.979104	110152	2492	107660	phecode 316	mental disorders
Coronary atherosclerosis	OR=0.99 (0.84 to 1.17)	0.9286	0.979104	115660	6605	109055	phecode 411.4	circulatory system
Other forms of chronic heart disease	OR=1.02 (0.63 to 1.65)	0.9312	0.979104	109814	759	109055	phecode 414	circulatory system
Septicemia	OR=0.99 (0.7 to 1.38)	0.9329	0.979104	115435	1529	113906	phecode 038	infectious diseases
Diseases of hard tissues of teeth	OR=0.98 (0.65 to 1.48)	0.934	0.979104	116538	1038	115500	phecode 521	digestive
Cardiac and circulatory congenital anomalies	OR=1.02 (0.66 to 1.58)	0.9346	0.979104	118535	911	117624	phecode 747	congenital anomalies
Respiratory failure; insufficiency; arrest	OR=1.02 (0.67 to 1.55)	0.9347	0.979104	115147	976	114171	phecode 509	respiratory
Hyposmolality andoror hyponatremia	OR=0.98 (0.57 to 1.68)	0.9371	0.979292	116739	594	116145	phecode 276.12	endocrine metabolic
Acquired toe deformities	OR=1.02 (0.6 to 1.72)	0.9454	0.982152	117001	634	116367	phecode 735.2	musculoskeletal
Disorder of skin and subcutaneous tissue NOS	OR=1.01 (0.74 to 1.39)	0.9462	0.982152	118535	1760	116775	phecode 689	dermatologic
Rash and other nonspecific skin eruption	OR=0.98 (0.59 to 1.65)	0.9473	0.982152	117067	646	116421	phecode 687.1	dermatologic
Bacterial pneumonia	OR=0.99 (0.76 to 1.29)	0.951	0.982152	116978	2535	114443	phecode 480.1	respiratory
Inflammatory and toxic neuropathy	OR=0.98 (0.56 to 1.72)	0.9511	0.982152	118278	552	117726	phecode 357	neurological
Dental caries	OR=0.99 (0.65 to 1.49)	0.9532	0.982152	116527	1027	115500	phecode 521.1	digestive
Cardiac arrest and ventricular fibrillation	OR=1.02 (0.54 to 1.91)	0.958	0.983809	109621	435	109186	phecode 427.4	circulatory system
Psoriasis and related disorders	OR=1.01 (0.63 to 1.62)	0.9608	0.983809	109402	780	108622	phecode 696	dermatologic
Hematemesis	OR=1.01 (0.61 to 1.69)	0.9615	0.983809	111896	664	111232	phecode 578.1	digestive
Other upper respiratory disease	OR=1.01 (0.7 to 1.44)	0.9674	0.987554	113495	1362	112133	phecode 479	respiratory
Dysphagia	OR=0.99 (0.73 to 1.35)	0.9704	0.987576	106951	1896	105055	phecode 532	digestive
Urea	0.001 (-0.047 to 0.049)	0.9719	0.987576	112971	NA	NA	NA	biomarker
Renal failure NOS	OR=1.01 (0.52 to 1.96)	0.9793	0.992808	115131	396	114735	phecode 585.2	genitourinary
Acute renal failure	OR=1 (0.73 to 1.37)	0.9883	0.995056	116538	1803	114735	phecode 585.1	genitourinary
Duodenal ulcer	OR=1 (0.68 to 1.47)	0.9889	0.995056	117411	1168	116243	phecode 531.3	digestive
Cystitis	OR=1 (0.58 to 1.7)	0.9898	0.995056	111030	611	110419	phecode 592.1	genitourinary
Calculus of ureter	OR=1 (0.66 to 1.5)	0.9927	0.995056	116430	1046	115384	phecode 594.3	genitourinary
Psoriasis	OR=1 (0.62 to 1.62)	0.9928	0.995056	109381	759	108622	phecode 696.4	dermatologic
Pneumococcal pneumonia	OR=1 (0.76 to 1.32)	0.9986	0.9986	116697	2254	114443	phecode 480.11	respiratory

## Sheet: Table 7
Supplementary File 1 - Table 9. Associations of genetically-predicted calculated free testosterone for 439 health outcomes across the human phenome excluding individuals on cholesterol-lowering medication
Trait	Effect per 0.1 nmol/L increase CFT (95% CI)	P-value	FDR-adjusted p-value	Sample Size	Number of Cases	Number of Controls	Phecode (if applicable)	Category
Creatinine	0.119 (0.082 to 0.156)	3.229e-10	1.42399e-07	115799	NA	NA	NA	biomarker
C-reactive protein	-0.08 (-0.119 to -0.042)	3.707e-05	0.00817394	115569	NA	NA	NA	biomarker
Apolipoprotein A	-0.019 (-0.028 to -0.01)	5.971e-05	0.00877737	106807	NA	NA	NA	biomarker
HDL cholesterol	-0.077 (-0.116 to -0.038)	0.0001188	0.0122774	106972	NA	NA	NA	biomarker
Umbilical hernia	OR=1.83 (1.34 to 2.49)	0.0001392	0.0122774	103930	1814	102116	phecode 550.4	digestive
Hypotension	OR=0.56 (0.41 to 0.76)	0.0002197	0.016148	116879	1909	114970	phecode 458	circulatory system
Degenerative skin conditions and other dermatoses	OR=0.56 (0.41 to 0.77)	0.0003464	0.0217744	120338	1785	118553	phecode 702	dermatologic
IGF1	0.364 (0.163 to 0.565)	0.000395	0.0217744	115263	NA	NA	NA	biomarker
Essential hypertension	OR=1.19 (1.07 to 1.32)	0.0008249	0.0382347	121158	21233	99925	phecode 401.1	circulatory system
Hypotension NOS	OR=0.57 (0.41 to 0.79)	0.0008734	0.0382347	116614	1644	114970	phecode 458.9	circulatory system
Hypertension	OR=1.19 (1.07 to 1.31)	0.0009537	0.0382347	121244	21319	99925	phecode 401	circulatory system
Spinal stenosis	OR=1.88 (1.28 to 2.77)	0.00125	0.0459375	118554	1175	117379	phecode 720	musculoskeletal
Hypercholesterolemia	OR=1.31 (1.11 to 1.55)	0.001622	0.0550232	120894	6512	114382	phecode 272.11	endocrine metabolic
Inguinal hernia	OR=1.24 (1.08 to 1.42)	0.002012	0.063378	112581	10465	102116	phecode 550.1	digestive
Hemiplegia	OR=0.38 (0.2 to 0.71)	0.002427	0.0704773	115099	454	114645	phecode 342	neurological
Abdominal hernia	OR=1.17 (1.06 to 1.3)	0.002557	0.0704773	121474	19358	102116	phecode 550	digestive
Seborrheic keratosis	OR=0.53 (0.35 to 0.81)	0.003173	0.081459	120693	1004	119689	phecode 702.2	dermatologic
Back pain	OR=1.38 (1.11 to 1.71)	0.003336	0.081459	121474	3861	117613	phecode 760	symptoms
Disorders of lipoid metabolism	OR=1.27 (1.08 to 1.5)	0.003655	0.081459	121474	7092	114382	phecode 272	endocrine metabolic
Internal derangement of knee	OR=1.29 (1.09 to 1.53)	0.003761	0.081459	120667	6223	114444	phecode 835	injuries and poisonings
Hyperlipidemia	OR=1.27 (1.08 to 1.49)	0.003879	0.081459	121447	7065	114382	phecode 272.1	endocrine metabolic
Fasciitis	OR=0.66 (0.49 to 0.89)	0.006353	0.121812	113534	1970	111564	phecode 728.7	musculoskeletal
Inflammatory diseases of prostate	OR=1.55 (1.13 to 2.13)	0.006353	0.121812	39044	1872	37172	phecode 601	genitourinary
Other disorders of urethra and urinary tract	OR=1.61 (1.14 to 2.27)	0.006933	0.123498	117396	1476	115920	phecode 597	genitourinary
Albumin	-0.136 (-0.235 to -0.037)	0.007001	0.123498	107018	NA	NA	NA	biomarker
GERD	OR=1.24 (1.06 to 1.45)	0.007653	0.129807	115190	7426	107764	phecode 530.11	digestive
Phosphate	-0.009 (-0.015 to -0.002)	0.009088	0.148437	106811	NA	NA	NA	biomarker
Contracture of palmar fascia Dupuytrens disease	OR=0.67 (0.49 to 0.91)	0.01158	0.180114	113412	1848	111564	phecode 728.71	musculoskeletal
Fracture of upper limb	OR=0.71 (0.54 to 0.93)	0.01244	0.180114	117584	2437	115147	phecode 803	injuries and poisonings
Lipoma	OR=1.4 (1.07 to 1.84)	0.01312	0.180114	121170	2429	118741	phecode 214	neoplasms
Other symptoms involving abdomen and pelvis	OR=1.69 (1.11 to 2.56)	0.01407	0.180114	114923	999	113924	phecode 579	digestive
Urethral stricture not specified as infectious	OR=1.58 (1.1 to 2.28)	0.01416	0.180114	117220	1300	115920	phecode 597.1	genitourinary
Convulsions	OR=1.75 (1.11 to 2.74)	0.01504	0.180114	115498	853	114645	phecode 345.3	neurological
Osteoporosis	OR=0.53 (0.32 to 0.88)	0.01509	0.180114	121122	673	120449	phecode 743.1	musculoskeletal
Osteoporosis NOS	OR=0.53 (0.32 to 0.88)	0.01509	0.180114	121122	673	120449	phecode 743.11	musculoskeletal
Gout	OR=1.49 (1.08 to 2.05)	0.0152	0.180114	121261	1712	119549	phecode 274.1	endocrine metabolic
Prostatitis	OR=1.69 (1.11 to 2.57)	0.01528	0.180114	38199	1027	37172	phecode 601.1	genitourinary
Chronic dermatitis due to solar radiation	OR=0.58 (0.37 to 0.9)	0.01552	0.180114	120352	904	119448	phecode 938.2	dermatologic
Unspecified monoarthritis	OR=1.22 (1.04 to 1.44)	0.01628	0.184089	115270	6797	108473	phecode 716.2	musculoskeletal
Disorders of muscle; ligament; and fascia	OR=0.71 (0.53 to 0.94)	0.01798	0.19823	113758	2194	111564	phecode 728	musculoskeletal
Mitral valve disease	OR=0.61 (0.41 to 0.93)	0.01969	0.209475	117822	1046	116776	phecode 394.2	circulatory system
Actinic keratosis	OR=0.59 (0.37 to 0.92)	0.01995	0.209475	120555	866	119689	phecode 702.1	dermatologic
Chronic bronchitis	OR=1.34 (1.04 to 1.73)	0.02196	0.211129	114823	2819	112004	phecode 496.2	respiratory
Obstructive chronic bronchitis	OR=1.35 (1.04 to 1.74)	0.0222	0.211129	114769	2765	112004	phecode 496.21	respiratory
Gout and other crystal arthropathies	OR=1.42 (1.05 to 1.92)	0.02236	0.211129	121474	1925	119549	phecode 274	endocrine metabolic
Dermatitis due to solar radiation	OR=0.6 (0.39 to 0.93)	0.0225	0.211129	120381	933	119448	phecode 938	dermatologic
Total protein	-0.185 (-0.344 to -0.026)	0.02257	0.211129	106886	NA	NA	NA	biomarker
Spondylosis and allied disorders	OR=1.41 (1.05 to 1.88)	0.02298	0.211129	119424	2045	117379	phecode 721	musculoskeletal
Cancer; suspected or other	OR=1.18 (1.02 to 1.36)	0.02432	0.21888	117604	9438	108166	phecode 195	neoplasms
Cerebral artery occlusion; with cerebral infarction	OR=0.54 (0.32 to 0.93)	0.02496	0.220147	118973	611	118362	phecode 433.21	circulatory system
Total bilirubin	0.044 (0.005 to 0.082)	0.02576	0.220754	115368	NA	NA	NA	biomarker
Other local infections of skin and subcutaneous tissue	OR=0.69 (0.49 to 0.96)	0.02603	0.220754	118948	1611	117337	phecode 686	dermatologic
Nonrheumatic mitral valve disorders	OR=0.63 (0.41 to 0.95)	0.02679	0.222913	117803	1027	116776	phecode 395.1	circulatory system
Other disorders of prostate	OR=1.71 (1.05 to 2.79)	0.03011	0.244073	37956	784	37172	phecode 602	genitourinary
Lipoma of skin and subcutaneous tissue	OR=1.43 (1.03 to 1.98)	0.03044	0.244073	120398	1657	118741	phecode 214.1	neoplasms
Tobacco use disorder	OR=1.2 (1.02 to 1.42)	0.03157	0.248614	117178	6575	110603	phecode 318	mental disorders
Malignant neoplasm; other	OR=1.17 (1.01 to 1.35)	0.03307	0.250922	117382	9216	108166	phecode 195.1	neoplasms
Fracture of unspecified part of femur	OR=0.57 (0.34 to 0.96)	0.03323	0.250922	115801	654	115147	phecode 800.2	injuries and poisonings
Calcium	-0.004 (-0.007 to 0)	0.03357	0.250922	106982	NA	NA	NA	biomarker
Other disorders of peritoneum	OR=1.59 (1.03 to 2.44)	0.03451	0.253648	111884	943	110941	phecode 568	digestive
Fracture of lower limb	OR=0.73 (0.55 to 0.98)	0.0382	0.276167	117176	2029	115147	phecode 800	injuries and poisonings
Sciatica	OR=1.73 (1.03 to 2.92)	0.03899	0.276659	120988	632	120356	phecode 764	symptoms
Intestinal obstruction without mention of hernia	OR=1.47 (1.02 to 2.12)	0.03967	0.276659	100944	1313	99631	phecode 560	digestive
Fracture of radius and ulna	OR=0.67 (0.45 to 0.98)	0.04015	0.276659	116318	1171	115147	phecode 803.2	injuries and poisonings
Other symptomsordisorders or the urinary system	OR=1.17 (1.01 to 1.36)	0.0422	0.285794	121474	8452	113022	phecode 599	genitourinary
Secondary malignant neoplasm	OR=1.28 (1.01 to 1.64)	0.0433	0.285794	111236	3070	108166	phecode 198	neoplasms
Peripheral vascular disease; unspecified	OR=1.75 (1.02 to 3.01)	0.04342	0.285794	119389	590	118799	phecode 443.9	circulatory system
Right bundle branch block	OR=0.6 (0.36 to 0.99)	0.04438	0.287817	112256	693	111563	phecode 426.31	circulatory system
Urinary tract infection	OR=1.26 (1 to 1.59)	0.05183	0.331261	116204	3340	112864	phecode 591	genitourinary
Urinary obstruction	OR=1.47 (0.99 to 2.19)	0.05444	0.342972	114139	1117	113022	phecode 599.1	genitourinary
Peritoneal adhesions postoperative postinfection	OR=1.54 (0.99 to 2.39)	0.05732	0.352739	111827	886	110941	phecode 568.1	digestive
Other disorders of intestine	OR=1.19 (0.99 to 1.42)	0.05759	0.352739	116735	5794	110941	phecode 569	digestive
Other and unspecified disc disorder	OR=1.38 (0.99 to 1.94)	0.05952	0.359566	118897	1518	117379	phecode 722.9	musculoskeletal
Esophagitis; GERD and related diseases	OR=1.14 (0.99 to 1.3)	0.06075	0.360385	118118	10354	107764	phecode 530.1	digestive
Duodenitis	OR=1.27 (0.99 to 1.64)	0.06129	0.360385	114579	2784	111795	phecode 535.6	digestive
Allergyoradverse effect of penicillin	OR=1.22 (0.99 to 1.51)	0.06645	0.385585	118367	3882	114485	phecode 960.2	injuries and poisonings
Hydronephrosis	OR=1.51 (0.96 to 2.37)	0.07338	0.418893	118881	853	118028	phecode 595	genitourinary
Symptoms involving head and neck	OR=1.41 (0.97 to 2.05)	0.07409	0.418893	121474	1231	120243	phecode 293	mental disorders
Alkaline phosphatase	-0.034 (-0.072 to 0.004)	0.07584	0.42336	115860	NA	NA	NA	biomarker
Esophageal bleeding varicesorhemorrhage	OR=0.63 (0.38 to 1.05)	0.07753	0.427384	108450	686	107764	phecode 530.2	digestive
Delirium dementia and amnestic and other cognitive disorders	OR=1.45 (0.96 to 2.21)	0.07984	0.434385	119811	1007	118804	phecode 290	mental disorders
Other peripheral nerve disorders	OR=1.27 (0.97 to 1.66)	0.08077	0.434385	119802	2468	117334	phecode 351	neurological
Erythematous conditions	OR=1.61 (0.94 to 2.75)	0.08326	0.442381	120153	600	119553	phecode 695	dermatologic
Arthropathy NOS	OR=1.12 (0.98 to 1.28)	0.08454	0.442764	120189	11716	108473	phecode 716.9	musculoskeletal
Chronic airway obstruction	OR=1.22 (0.97 to 1.54)	0.08534	0.442764	115434	3430	112004	phecode 496	respiratory
Gamma glutamyltransferase	0.033 (-0.005 to 0.072)	0.08955	0.459204	115794	NA	NA	NA	biomarker
Alanine aminotransferase	0.033 (-0.005 to 0.071)	0.09316	0.472225	115780	NA	NA	NA	biomarker
Sleep apnea	OR=1.3 (0.95 to 1.77)	0.09624	0.482294	121139	1818	119321	phecode 327.3	neurological
Visual disturbances	OR=0.7 (0.46 to 1.07)	0.09971	0.484209	121474	1006	120468	phecode 368	sense organs
Other arthropathies	OR=1.11 (0.98 to 1.27)	0.09978	0.484209	120221	11748	108473	phecode 716	musculoskeletal
Secondary malignancy of lymph nodes	OR=1.33 (0.95 to 1.88)	0.1003	0.484209	109648	1482	108166	phecode 198.1	neoplasms
Intervertebral disc disorders	OR=1.28 (0.95 to 1.71)	0.1015	0.484209	119426	2047	117379	phecode 722	musculoskeletal
Osteoarthrosis NOS	OR=1.22 (0.96 to 1.54)	0.1022	0.484209	116919	3244	113675	phecode 740.9	musculoskeletal
Abal heart sounds	OR=0.81 (0.63 to 1.04)	0.1038	0.484209	119519	2743	116776	phecode 396	circulatory system
Functional digestive disorders	OR=1.13 (0.98 to 1.3)	0.1045	0.484209	108831	9200	99631	phecode 564	digestive
Altered mental status	OR=1.44 (0.92 to 2.26)	0.1065	0.484209	119678	874	118804	phecode 292.4	mental disorders
Direct bilirubin	0.033 (-0.007 to 0.072)	0.1081	0.484209	107392	NA	NA	NA	biomarker
Acute pulmonary heart disease	OR=1.32 (0.94 to 1.84)	0.1087	0.484209	120369	1558	118811	phecode 415.1	circulatory system
Pulmonary embolism and infarction; acute	OR=1.32 (0.94 to 1.84)	0.1087	0.484209	120369	1558	118811	phecode 415.11	circulatory system
Diseases of the oral soft tissues; excluding lesions specific for gingiva and tongue	OR=1.35 (0.93 to 1.97)	0.1098	0.484218	120982	1254	119728	phecode 528	digestive
Tachycardia NOS	OR=0.67 (0.41 to 1.1)	0.1123	0.488953	112295	732	111563	phecode 427.7	circulatory system
Peptic ulcer excl esophageal	OR=0.8 (0.61 to 1.05)	0.1141	0.488953	121474	2348	119126	phecode 531	digestive
Diseases of pancreas	OR=1.42 (0.92 to 2.21)	0.1142	0.488953	121474	901	120573	phecode 577	digestive
Osteoporosis; osteopenia and pathological fracture	OR=0.72 (0.47 to 1.09)	0.1164	0.493581	121474	1025	120449	phecode 743	musculoskeletal
Benign neoplasm of colon	OR=1.13 (0.97 to 1.32)	0.1178	0.49476	101110	7856	93254	phecode 208	neoplasms
Other specified peripheral vascular diseases	OR=1.43 (0.91 to 2.27)	0.1227	0.510478	119630	831	118799	phecode 443.8	circulatory system
Diseases of esophagus	OR=1.11 (0.97 to 1.26)	0.1261	0.516658	119230	11466	107764	phecode 530	digestive
Osteoarthrosis	OR=1.13 (0.97 to 1.32)	0.1269	0.516658	121474	7799	113675	phecode 740	musculoskeletal
Other acute and subacute forms of ischemic heart disease	OR=1.55 (0.88 to 2.73)	0.1277	0.516658	113645	542	113103	phecode 411.9	circulatory system
Other biliary tract disease	OR=1.37 (0.91 to 2.05)	0.1303	0.522385	118799	1063	117736	phecode 575	digestive
Other anemias	OR=0.83 (0.65 to 1.06)	0.134	0.532378	119722	3085	116637	phecode 285	hematopoietic
Degeneration of macula and posterior pole of retina	OR=1.49 (0.88 to 2.52)	0.1377	0.537396	81342	642	80700	phecode 362.2	sense organs
Macular degeneration senile of retina NOS	OR=1.49 (0.88 to 2.52)	0.1377	0.537396	81342	642	80700	phecode 362.29	sense organs
Duodenal ulcer	OR=0.75 (0.51 to 1.1)	0.142	0.546457	120344	1218	119126	phecode 531.3	digestive
Anal and rectal conditions	OR=1.15 (0.96 to 1.38)	0.1425	0.546457	116383	5442	110941	phecode 565	digestive
Gastrointestinal hemorrhage	OR=1.13 (0.96 to 1.33)	0.1442	0.548209	120663	6739	113924	phecode 578	digestive
Abality of gait	OR=0.71 (0.44 to 1.14)	0.1525	0.574808	121091	787	120304	phecode 350.2	neurological
Cardiomegaly	OR=0.74 (0.5 to 1.12)	0.1552	0.580027	119874	1063	118811	phecode 416	circulatory system
Poisoning by antibiotics	OR=1.16 (0.94 to 1.43)	0.1568	0.581082	118722	4237	114485	phecode 960	injuries and poisonings
Abdominal pain	OR=1.11 (0.96 to 1.27)	0.1596	0.585392	121474	9393	112081	phecode 785	symptoms
Fracture of clavicle or scapula	OR=0.73 (0.47 to 1.14)	0.1608	0.585392	116023	876	115147	phecode 803.3	injuries and poisonings
Orthostatic hypotension	OR=0.66 (0.37 to 1.18)	0.1622	0.585392	115481	511	114970	phecode 458.1	circulatory system
Abal findings examination of lungs	OR=1.38 (0.88 to 2.15)	0.1637	0.585392	121474	866	120608	phecode 514	respiratory
Personal history of diseases of digestive system	OR=1.14 (0.95 to 1.37)	0.1646	0.585392	105175	5544	99631	phecode 564.9	digestive
First degree AV block	OR=0.64 (0.34 to 1.2)	0.1673	0.590234	112010	447	111563	phecode 426.21	circulatory system
Other disorders of soft tissues	OR=0.82 (0.62 to 1.09)	0.1779	0.610257	113708	2144	111564	phecode 729	musculoskeletal
Symptoms involving digestive system	OR=1.16 (0.94 to 1.42)	0.1781	0.610257	103712	4081	99631	phecode 561	digestive
Fracture of tibia and fibula	OR=0.72 (0.44 to 1.16)	0.1794	0.610257	115899	752	115147	phecode 800.3	injuries and poisonings
Nasal polyps	OR=1.26 (0.9 to 1.78)	0.1825	0.610257	116293	1480	114813	phecode 471	respiratory
Pulmonary heart disease	OR=1.24 (0.9 to 1.71)	0.1842	0.610257	120510	1699	118811	phecode 415	circulatory system
Occlusion and stenosis of precerebral arteries	OR=1.58 (0.8 to 3.12)	0.186	0.610257	118737	375	118362	phecode 433.1	circulatory system
Other specified cardiac dysrhythmias	OR=0.78 (0.53 to 1.13)	0.1878	0.610257	112808	1245	111563	phecode 427.3	circulatory system
Poisoning by primarily systemic agents	OR=1.39 (0.85 to 2.28)	0.189	0.610257	115201	716	114485	phecode 963	injuries and poisonings
Cholelithiasis with other cholecystitis	OR=1.3 (0.88 to 1.93)	0.1895	0.610257	118863	1127	117736	phecode 574.12	digestive
Other disorders of bone and cartilage	OR=0.77 (0.52 to 1.14)	0.1897	0.610257	119014	1121	117893	phecode 733	musculoskeletal
Otitis media and Eustachian tube disorders	OR=1.4 (0.84 to 2.32)	0.1929	0.610257	120959	675	120284	phecode 381	sense organs
Vitamin D	0.026 (-0.013 to 0.064)	0.193	0.610257	111844	NA	NA	NA	biomarker
Frequency of urination and polyuria	OR=1.27 (0.89 to 1.81)	0.1935	0.610257	114389	1367	113022	phecode 599.5	genitourinary
Secondary malignancy of bone	OR=1.33 (0.86 to 2.06)	0.1942	0.610257	109093	927	108166	phecode 198.6	neoplasms
Postoperative infection	OR=1.27 (0.88 to 1.84)	0.1947	0.610257	121145	1304	119841	phecode 080	infectious diseases
Retention of urine	OR=1.16 (0.93 to 1.45)	0.1957	0.610257	116708	3686	113022	phecode 599.2	genitourinary
Heart valve disorders	OR=0.82 (0.61 to 1.11)	0.1965	0.610257	118770	1994	116776	phecode 395	circulatory system
Hemorrhage of gastrointestinal tract	OR=1.21 (0.9 to 1.61)	0.2016	0.621717	116027	2103	113924	phecode 578.9	digestive
Peripheral vascular disease	OR=1.33 (0.85 to 2.08)	0.206	0.630875	119676	877	118799	phecode 443	circulatory system
Type 1 diabetes	OR=0.64 (0.32 to 1.28)	0.2077	0.631694	117632	363	117269	phecode 250.1	endocrine metabolic
Intestinal infection	OR=1.17 (0.92 to 1.5)	0.2106	0.636127	121474	2938	118536	phecode 008	infectious diseases
Circulatory disease NEC	OR=0.89 (0.73 to 1.07)	0.2132	0.638118	119934	4964	114970	phecode 459.9	circulatory system
Open wounds of head; neck; and trunk	OR=1.23 (0.89 to 1.69)	0.215	0.638118	119102	1682	117420	phecode 870	injuries and poisonings
Epilepsy; recurrent seizures; convulsions	OR=1.22 (0.89 to 1.68)	0.2156	0.638118	116382	1737	114645	phecode 345	neurological
Bundle branch block	OR=0.79 (0.54 to 1.15)	0.2214	0.649668	112799	1236	111563	phecode 426.3	circulatory system
Sleep disorders	OR=1.19 (0.9 to 1.59)	0.2243	0.649668	121474	2153	119321	phecode 327	neurological
Other disorders of bladder	OR=1.14 (0.92 to 1.41)	0.2261	0.649668	119881	3961	115920	phecode 596	genitourinary
Bacterial pneumonia	OR=0.85 (0.66 to 1.1)	0.2277	0.649668	119825	2655	117170	phecode 480.1	respiratory
Gastric ulcer	OR=0.79 (0.54 to 1.16)	0.2295	0.649668	120324	1198	119126	phecode 531.2	digestive
Other disorders of circulatory system	OR=0.89 (0.74 to 1.08)	0.2304	0.649668	119994	5024	114970	phecode 459	circulatory system
Ventral hernia	OR=1.26 (0.86 to 1.83)	0.2309	0.649668	103355	1239	102116	phecode 550.5	digestive
Hemorrhoids	OR=1.1 (0.94 to 1.29)	0.2331	0.649668	117280	7463	109817	phecode 455	circulatory system
Rheumatic disease of the heart valves	OR=0.83 (0.61 to 1.13)	0.2342	0.649668	118594	1818	116776	phecode 394	circulatory system
Precordial pain	OR=0.78 (0.52 to 1.18)	0.237	0.649668	114327	1022	113305	phecode 418.1	circulatory system
Urate	1.611 (-1.064 to 4.287)	0.238	0.649668	115723	NA	NA	NA	biomarker
Retinal detachments and defects	OR=0.81 (0.56 to 1.15)	0.2388	0.649668	118711	1371	117340	phecode 361	sense organs
Retinal detachment with retinal defect	OR=0.81 (0.56 to 1.15)	0.2388	0.649668	118711	1371	117340	phecode 361.1	sense organs
Other inflammatory spondylopathies	OR=1.35 (0.82 to 2.25)	0.2407	0.649668	121474	674	120800	phecode 715	musculoskeletal
Candidiasis	OR=1.35 (0.82 to 2.23)	0.2416	0.649668	121251	688	120563	phecode 112	infectious diseases
Acute renal failure	OR=0.84 (0.63 to 1.13)	0.2451	0.651139	119127	2117	117010	phecode 585.1	genitourinary
Other hypertrophic and atrophic conditions of skin	OR=1.24 (0.86 to 1.79)	0.2482	0.655426	121436	1290	120146	phecode 701	dermatologic
Other disorders of synovium; tendon; and bursa	OR=1.16 (0.9 to 1.49)	0.2557	0.666617	114313	2749	111564	phecode 727	musculoskeletal
Redundant prepuce and phimosisorBXO	OR=1.2 (0.88 to 1.64)	0.2583	0.666617	110583	1756	108827	phecode 604.1	genitourinary
Septal DeviationsorTurbinate Hypertrophy	OR=1.19 (0.88 to 1.6)	0.2587	0.666617	116780	1967	114813	phecode 470	respiratory
Cholecystitis without cholelithiasis	OR=0.75 (0.45 to 1.24)	0.2626	0.666617	118406	670	117736	phecode 574.3	digestive
Other disorders of the kidney and ureters	OR=1.24 (0.85 to 1.79)	0.2628	0.666617	118283	1273	117010	phecode 586	genitourinary
Fracture of vertebral column without mention of spinal cord injury	OR=0.75 (0.46 to 1.24)	0.265	0.666617	115840	693	115147	phecode 805	injuries and poisonings
Alcohol related disorders	OR=1.11 (0.93 to 1.32)	0.2677	0.666617	116319	5716	110603	phecode 317	mental disorders
Synovitis and tenosynovitis	OR=1.22 (0.86 to 1.73)	0.268	0.666617	112986	1422	111564	phecode 727.1	musculoskeletal
Renal colic	OR=0.77 (0.49 to 1.22)	0.2681	0.666617	118845	817	118028	phecode 594.8	genitourinary
Effects radiation NOS	OR=1.23 (0.85 to 1.8)	0.2697	0.666617	120372	1252	119120	phecode 990	injuries and poisonings
Acute pancreatitis	OR=1.34 (0.8 to 2.26)	0.2718	0.666617	121208	635	120573	phecode 577.1	digestive
Other diseases of blood and blood forming organs	OR=1.21 (0.86 to 1.7)	0.2725	0.666617	120442	1512	118930	phecode 289	hematopoietic
Cholesterol	-0.022 (-0.061 to 0.017)	0.273	0.666617	115873	NA	NA	NA	biomarker
Benign neoplasm of other parts of digestive system	OR=1.21 (0.86 to 1.7)	0.2736	0.666617	121474	1503	119971	phecode 211	neoplasms
Diaphragmatic hernia	OR=1.09 (0.93 to 1.27)	0.2851	0.687767	109966	7850	102116	phecode 550.2	digestive
Cystatin C	0.019 (-0.016 to 0.054)	0.2854	0.687767	115851	NA	NA	NA	biomarker
Appendiceal conditions	OR=0.82 (0.56 to 1.19)	0.2949	0.701378	121474	1202	120272	phecode 540	digestive
Dysphagia	OR=0.85 (0.63 to 1.15)	0.2961	0.701378	109708	1944	107764	phecode 532	digestive
Pericarditis	OR=0.74 (0.42 to 1.31)	0.2967	0.701378	120761	533	120228	phecode 420.2	circulatory system
Chronic liver disease and cirrhosis	OR=0.81 (0.55 to 1.2)	0.2983	0.701378	119428	1169	118259	phecode 571	digestive
Carditis	OR=0.78 (0.49 to 1.24)	0.299	0.701378	121038	810	120228	phecode 420	circulatory system
Diseases of white blood cells	OR=1.22 (0.83 to 1.79)	0.3012	0.7028	120126	1196	118930	phecode 288	hematopoietic
Nerve root and plexus disorders	OR=1.2 (0.85 to 1.71)	0.3031	0.703511	118754	1420	117334	phecode 353	neurological
Carbuncle and furuncle	OR=0.79 (0.5 to 1.24)	0.3074	0.706289	118186	849	117337	phecode 686.1	dermatologic
Gastritis and duodenitis	OR=1.08 (0.93 to 1.25)	0.3075	0.706289	120408	8613	111795	phecode 535	digestive
Anxiety disorder	OR=1.17 (0.86 to 1.6)	0.31	0.706509	109873	1840	108033	phecode 300.1	mental disorders
Asthma	OR=1.09 (0.92 to 1.28)	0.3108	0.706509	118994	6990	112004	phecode 495	respiratory
Cardiac conduction disorders	OR=0.87 (0.67 to 1.14)	0.3141	0.7092	114084	2521	111563	phecode 426	circulatory system
Atrioventricular AV block	OR=0.79 (0.51 to 1.24)	0.3152	0.7092	112442	879	111563	phecode 426.2	circulatory system
Staphylococcus infections	OR=0.82 (0.56 to 1.21)	0.3223	0.721191	117706	1157	116549	phecode 041.1	infectious diseases
Diseases of the larynx and vocal cords	OR=1.26 (0.79 to 2.02)	0.3238	0.721191	115613	800	114813	phecode 473	respiratory
Apolipoprotein B	0.004 (-0.004 to 0.013)	0.33	0.731307	115123	NA	NA	NA	biomarker
Anxiety disorders	OR=1.15 (0.86 to 1.55)	0.335	0.733841	110081	2048	108033	phecode 300	mental disorders
Abal sputum	OR=1.18 (0.84 to 1.66)	0.3367	0.733841	121474	1530	119944	phecode 516	respiratory
Bacterial enteritis	OR=1.26 (0.78 to 2.04)	0.3367	0.733841	119294	758	118536	phecode 008.5	infectious diseases
Other chronic nonalcoholic liver disease	OR=0.8 (0.5 to 1.27)	0.3378	0.733841	119077	818	118259	phecode 571.5	digestive
Paroxysmal supraventricular tachycardia	OR=0.78 (0.47 to 1.3)	0.3396	0.734135	112226	663	111563	phecode 427.11	circulatory system
Diabetes mellitus	OR=0.91 (0.74 to 1.11)	0.3522	0.75766	121474	4205	117269	phecode 250	endocrine metabolic
Other headache syndromes	OR=0.87 (0.65 to 1.17)	0.3586	0.762421	121094	2025	119069	phecode 339	neurological
Hemorrhage of rectum and anus	OR=1.11 (0.89 to 1.38)	0.3594	0.762421	117702	3778	113924	phecode 578.8	digestive
Appendicitis	OR=0.83 (0.57 to 1.23)	0.3596	0.762421	121430	1158	120272	phecode 540.1	digestive
Noninfectious gastroenteritis	OR=1.11 (0.89 to 1.38)	0.3687	0.775459	103265	3634	99631	phecode 558	digestive
Acquired foot deformities	OR=0.82 (0.54 to 1.26)	0.3697	0.775459	120200	988	119212	phecode 735	musculoskeletal
Acute appendicitis	OR=0.83 (0.54 to 1.25)	0.3715	0.775459	121271	999	120272	phecode 540.11	digestive
Other intestinal obstruction	OR=1.2 (0.8 to 1.81)	0.373	0.775459	100682	1051	99631	phecode 560.4	digestive
Hypothyroidism NOS	OR=1.17 (0.83 to 1.65)	0.376	0.775459	121042	1490	119552	phecode 244.4	endocrine metabolic
Complication of internal orthopedic device	OR=0.86 (0.61 to 1.21)	0.3763	0.775459	115577	1491	114086	phecode 858	injuries and poisonings
Spondylosis without myelopathy	OR=1.18 (0.82 to 1.7)	0.3801	0.779647	118685	1306	117379	phecode 721.1	musculoskeletal
Cerebral ischemia	OR=1.18 (0.81 to 1.73)	0.3819	0.779713	119599	1237	118362	phecode 433.3	circulatory system
Unspecified diffuse connective tissue disease	OR=0.8 (0.47 to 1.34)	0.3891	0.790752	112998	650	112348	phecode 709.7	dermatologic
Inflammatory and toxic neuropathy	OR=0.79 (0.46 to 1.36)	0.3916	0.790834	121201	587	120614	phecode 357	neurological
Melanomas of skin	OR=1.17 (0.81 to 1.68)	0.3965	0.790834	114460	1323	113137	phecode 172.11	neoplasms
Melanomas of skin; dx or hx	OR=1.17 (0.81 to 1.68)	0.3965	0.790834	114460	1323	113137	phecode 172.1	neoplasms
Hematuria	OR=1.08 (0.9 to 1.3)	0.3992	0.790834	118370	5506	112864	phecode 593	genitourinary
Other forms of chronic heart disease	OR=0.81 (0.51 to 1.31)	0.3998	0.790834	113871	768	113103	phecode 414	circulatory system
Osteoarthritis; localized	OR=1.09 (0.9 to 1.31)	0.3999	0.790834	118729	5054	113675	phecode 740.1	musculoskeletal
Aspartate aminotransferase	0.016 (-0.022 to 0.054)	0.4073	0.796131	115412	NA	NA	NA	biomarker
Rash and other nonspecific skin eruption	OR=0.81 (0.49 to 1.34)	0.4077	0.796131	119935	680	119255	phecode 687.1	dermatologic
Swelling of limb	OR=0.86 (0.6 to 1.23)	0.4093	0.796131	121251	1388	119863	phecode 771.1	symptoms
Hypovolemia	OR=0.84 (0.56 to 1.27)	0.4098	0.796131	119831	1054	118777	phecode 276.5	endocrine metabolic
Pneumococcal pneumonia	OR=0.89 (0.68 to 1.17)	0.4122	0.797207	119534	2364	117170	phecode 480.11	respiratory
Irritable Bowel Syndrome	OR=0.84 (0.56 to 1.27)	0.4155	0.797207	100652	1021	99631	phecode 564.1	digestive
Hemoptysis	OR=1.15 (0.82 to 1.63)	0.4177	0.797207	121404	1460	119944	phecode 516.1	respiratory
Other non epithelial cancer of skin	OR=1.07 (0.91 to 1.26)	0.4194	0.797207	120234	7097	113137	phecode 172.2	neoplasms
Diffuse diseases of connective tissue	OR=0.82 (0.5 to 1.33)	0.4207	0.797207	113076	728	112348	phecode 709	dermatologic
Cancer of urinary organs incl kidney and bladder	OR=1.13 (0.84 to 1.53)	0.4212	0.797207	121474	1952	119522	phecode 189	neoplasms
Other diseases of respiratory system; not elsewhere classified	OR=1.1 (0.87 to 1.4)	0.4273	0.805247	121474	3148	118326	phecode 519	respiratory
Reflux esophagitis	OR=1.09 (0.88 to 1.37)	0.4291	0.805247	111385	3621	107764	phecode 530.14	digestive
Cholelithiasis	OR=1.1 (0.86 to 1.41)	0.4353	0.813421	120642	2906	117736	phecode 574.1	digestive
Psoriasis and related disorders	OR=0.84 (0.54 to 1.31)	0.4373	0.81371	112103	872	111231	phecode 696	dermatologic
Electrolyte imbalance	OR=1.14 (0.81 to 1.61)	0.4432	0.821224	120263	1486	118777	phecode 276.1	endocrine metabolic
Other diseases of the teeth and supporting structures	OR=1.2 (0.75 to 1.9)	0.4465	0.823877	119154	805	118349	phecode 525	digestive
Superficial cellulitis and abscess	OR=1.1 (0.85 to 1.42)	0.4575	0.831626	120102	2765	117337	phecode 681	dermatologic
Psoriasis	OR=0.84 (0.53 to 1.33)	0.4587	0.831626	112077	846	111231	phecode 696.4	dermatologic
Varicose veins	OR=1.1 (0.86 to 1.41)	0.4596	0.831626	112640	2823	109817	phecode 454	circulatory system
Obesity	OR=0.91 (0.72 to 1.16)	0.4605	0.831626	121452	3147	118305	phecode 278.1	endocrine metabolic
Complications of transplants and reattached limbs	OR=1.07 (0.89 to 1.28)	0.4618	0.831626	119610	5524	114086	phecode 851	injuries and poisonings
Dislocation	OR=1.18 (0.76 to 1.85)	0.4627	0.831626	115316	872	114444	phecode 830	injuries and poisonings
Overweight; obesity and other hyperalimentation	OR=0.92 (0.72 to 1.16)	0.4639	0.831626	121474	3169	118305	phecode 278	endocrine metabolic
Cystitis and urethritis	OR=1.2 (0.73 to 1.96)	0.4686	0.833277	113587	723	112864	phecode 592	genitourinary
Other symptoms of respiratory system	OR=0.92 (0.74 to 1.15)	0.4686	0.833277	121474	3728	117746	phecode 512	respiratory
Lymphadenitis	OR=1.17 (0.76 to 1.79)	0.4718	0.835598	119884	954	118930	phecode 289.4	hematopoietic
Purpura and other hemorrhagic conditions	OR=0.83 (0.51 to 1.37)	0.4746	0.8365	121188	700	120488	phecode 287	hematopoietic
Fracture of ankle and foot	OR=0.83 (0.5 to 1.38)	0.4773	0.8365	115815	668	115147	phecode 801	injuries and poisonings
Cardiac pacemakerordevice in situ	OR=1.19 (0.74 to 1.9)	0.478	0.8365	112347	784	111563	phecode 426.9	circulatory system
Other upper respiratory disease	OR=1.13 (0.8 to 1.61)	0.4868	0.846581	116209	1396	114813	phecode 479	respiratory
Diseases of hair and hair follicles	OR=0.89 (0.65 to 1.23)	0.4876	0.846581	121144	1768	119376	phecode 704	dermatologic
Abal movement	OR=0.87 (0.59 to 1.29)	0.4966	0.852317	121474	1170	120304	phecode 350	neurological
Colon cancer	OR=1.13 (0.79 to 1.62)	0.4972	0.852317	94548	1360	93188	phecode 153.2	neoplasms
Other abal blood chemistry	OR=1.08 (0.86 to 1.37)	0.4989	0.852317	121400	3222	118178	phecode 790.6	symptoms
Other open wound of head and face	OR=1.13 (0.8 to 1.59)	0.4991	0.852317	118870	1450	117420	phecode 870.3	injuries and poisonings
Triglycerides	0.013 (-0.025 to 0.052)	0.5018	0.852317	115746	NA	NA	NA	biomarker
Respiratory failure; insufficiency; arrest	OR=0.87 (0.57 to 1.31)	0.5025	0.852317	117969	1031	116938	phecode 509	respiratory
Psoriasis vulgaris	OR=0.84 (0.5 to 1.41)	0.5074	0.857331	111889	658	111231	phecode 696.41	dermatologic
Stricture and stenosis of esophagus	OR=0.86 (0.54 to 1.36)	0.5121	0.86197	108592	828	107764	phecode 530.3	digestive
Nonspecific findings on examination of blood	OR=1.08 (0.86 to 1.37)	0.5155	0.864233	121474	3296	118178	phecode 790	symptoms
Cardiac pacemaker in situ	OR=1.17 (0.72 to 1.91)	0.5182	0.864233	112301	738	111563	phecode 426.91	circulatory system
Constipation	OR=1.09 (0.85 to 1.39)	0.5204	0.864233	102498	2867	99631	phecode 563	digestive
Lipoprotein A	-0.014 (-0.056 to 0.029)	0.5232	0.864233	92883	NA	NA	NA	biomarker
Acquired toe deformities	OR=0.85 (0.51 to 1.42)	0.5261	0.864233	119868	656	119212	phecode 735.2	musculoskeletal
Paroxysmal tachycardia; unspecified	OR=0.87 (0.57 to 1.34)	0.5297	0.864233	112513	950	111563	phecode 427.1	circulatory system
Peripheral enthesopathies and allied syndromes	OR=1.07 (0.87 to 1.3)	0.5297	0.864233	115999	4435	111564	phecode 726	musculoskeletal
Hypertensive heart andoror renal disease	OR=1.23 (0.64 to 2.37)	0.5315	0.864233	100332	407	99925	phecode 401.2	circulatory system
Other diseases of respiratory system; NEC	OR=1.08 (0.85 to 1.38)	0.5362	0.864233	121283	2957	118326	phecode 519.8	respiratory
Substance addiction and disorders	OR=1.08 (0.84 to 1.4)	0.537	0.864233	113303	2700	110603	phecode 316	mental disorders
Other disorders of arteries and arterioles	OR=1.24 (0.63 to 2.44)	0.538	0.864233	119177	378	118799	phecode 447	circulatory system
Disorders of penis	OR=1.09 (0.82 to 1.46)	0.5398	0.864233	110967	2140	108827	phecode 604	genitourinary
Other retinal disorders	OR=1.12 (0.78 to 1.61)	0.5404	0.864233	82043	1343	80700	phecode 362	sense organs
Urinary incontinence	OR=1.15 (0.73 to 1.83)	0.5417	0.864233	113849	827	113022	phecode 599.4	genitourinary
Cataract	OR=1.06 (0.89 to 1.26)	0.5444	0.864233	121474	6090	115384	phecode 366	sense organs
Vertiginous syndromes and other disorders of vestibular system	OR=0.91 (0.66 to 1.25)	0.5448	0.864233	121474	1721	119753	phecode 386	sense organs
Respiratory abalities	OR=1.08 (0.84 to 1.38)	0.5483	0.866668	121474	2926	118548	phecode 513	respiratory
Inflammation of eyelids	OR=1.15 (0.73 to 1.8)	0.5552	0.868877	119446	850	118596	phecode 371.3	sense organs
Skin cancer	OR=1.05 (0.9 to 1.22)	0.5566	0.868877	121420	8283	113137	phecode 172	neoplasms
Unstable angina intermediate coronary syndrome	OR=1.15 (0.72 to 1.83)	0.5598	0.868877	113903	800	113103	phecode 411.1	circulatory system
Other disorders of stomach and duodenum	OR=1.09 (0.82 to 1.44)	0.5638	0.868877	114044	2249	111795	phecode 537	digestive
Poisoning by analgesics; antipyretics; and antirheumatics	OR=1.11 (0.78 to 1.56)	0.5642	0.868877	115962	1477	114485	phecode 965	injuries and poisonings
Fracture of ribs	OR=0.87 (0.54 to 1.4)	0.5656	0.868877	115910	763	115147	phecode 807	injuries and poisonings
Occlusion of cerebral arteries	OR=0.9 (0.63 to 1.29)	0.5679	0.868877	119720	1358	118362	phecode 433.2	circulatory system
Disorders of mineral metabolism	OR=0.88 (0.57 to 1.37)	0.5681	0.868877	121474	906	120568	phecode 275	endocrine metabolic
Other abality of urination	OR=1.15 (0.71 to 1.86)	0.5694	0.868877	113770	748	113022	phecode 599.9	genitourinary
Shortness of breath	OR=0.91 (0.65 to 1.26)	0.5734	0.871126	119367	1621	117746	phecode 512.7	respiratory
Ulcerative colitis	OR=0.89 (0.61 to 1.32)	0.5757	0.871126	100790	1159	99631	phecode 555.2	digestive
Open wounds of extremities	OR=1.08 (0.82 to 1.43)	0.5768	0.871126	119651	2231	117420	phecode 871	injuries and poisonings
Nausea and vomiting	OR=0.93 (0.72 to 1.2)	0.5806	0.873872	121474	2760	118714	phecode 789	symptoms
Non Hodgkins lymphoma	OR=1.13 (0.72 to 1.78)	0.5839	0.87585	120282	852	119430	phecode 202.2	neoplasms
Nonspecific chest pain	OR=1.04 (0.9 to 1.21)	0.5878	0.878711	121474	8169	113305	phecode 418	circulatory system
Thrombocytopenia	OR=0.86 (0.51 to 1.47)	0.591	0.880367	121110	622	120488	phecode 287.3	hematopoietic
Bronchiectasis	OR=1.16 (0.67 to 2)	0.5929	0.880367	112591	587	112004	phecode 496.3	respiratory
Other chronic ischemic heart disease; unspecified	OR=1.05 (0.89 to 1.24)	0.5955	0.88126	119836	6733	113103	phecode 411.8	circulatory system
Bladder neck obstruction	OR=1.11 (0.75 to 1.65)	0.6003	0.884646	117044	1124	115920	phecode 596.1	genitourinary
Renal failure	OR=0.94 (0.74 to 1.19)	0.6018	0.884646	120249	3239	117010	phecode 585	genitourinary
Musculoskeletal symptoms referable to limbs	OR=0.92 (0.66 to 1.28)	0.6126	0.889491	121474	1611	119863	phecode 771	symptoms
Disturbance of skin sensation	OR=1.13 (0.71 to 1.8)	0.6187	0.889491	120046	791	119255	phecode 687.4	dermatologic
Chronic renal failure CKD	OR=0.91 (0.64 to 1.31)	0.6201	0.889491	118379	1369	117010	phecode 585.3	genitourinary
Other disorders of eye	OR=0.91 (0.63 to 1.32)	0.6215	0.889491	120505	1257	119248	phecode 379	sense organs
Edema	OR=0.87 (0.5 to 1.51)	0.6216	0.889491	121426	574	120852	phecode 782.3	symptoms
Other specified gastritis	OR=0.93 (0.71 to 1.22)	0.6218	0.889491	114222	2427	111795	phecode 535.8	digestive
Respiratory insufficiency	OR=0.89 (0.54 to 1.44)	0.6233	0.889491	117678	740	116938	phecode 509.2	respiratory
Pneumonia	OR=0.95 (0.77 to 1.17)	0.6244	0.889491	121366	4196	117170	phecode 480	respiratory
Leukemia	OR=0.89 (0.57 to 1.4)	0.6265	0.889491	120293	863	119430	phecode 204	neoplasms
Diverticulosis	OR=0.96 (0.83 to 1.12)	0.6273	0.889491	108491	8860	99631	phecode 562.1	digestive
Diverticulosis and diverticulitis	OR=0.96 (0.83 to 1.12)	0.6273	0.889491	108491	8860	99631	phecode 562	digestive
Fracture of hand or wrist	OR=0.91 (0.64 to 1.31)	0.6293	0.889491	116468	1321	115147	phecode 804	injuries and poisonings
Phlebitis and thrombophlebitis	OR=0.92 (0.66 to 1.29)	0.634	0.893272	111359	1542	109817	phecode 451	circulatory system
Cancer of other lymphoid; histiocytic tissue	OR=1.1 (0.73 to 1.66)	0.6404	0.896745	120468	1038	119430	phecode 202	neoplasms
Glaucoma	OR=1.08 (0.78 to 1.49)	0.648	0.896745	119013	1673	117340	phecode 365	sense organs
Other disorders of eyelids	OR=1.08 (0.77 to 1.51)	0.6486	0.896745	120146	1550	118596	phecode 374	sense organs
Symptoms affecting skin	OR=0.94 (0.71 to 1.24)	0.6489	0.896745	121474	2219	119255	phecode 687	dermatologic
Cough	OR=1.11 (0.71 to 1.74)	0.6498	0.896745	118598	852	117746	phecode 512.8	respiratory
Hypothyroidism	OR=1.08 (0.77 to 1.51)	0.652	0.896745	121125	1573	119552	phecode 244	endocrine metabolic
Blood in stool	OR=1.11 (0.72 to 1.71)	0.6529	0.896745	114842	918	113924	phecode 578.2	digestive
Abal findings on examination of urine	OR=0.92 (0.65 to 1.31)	0.6538	0.896745	121474	1456	120018	phecode 598	genitourinary
Complications of cardiacorvascular device; implant; and graft	OR=1.12 (0.67 to 1.89)	0.6574	0.896745	114733	647	114086	phecode 854	injuries and poisonings
Decreased white blood cell count	OR=1.1 (0.72 to 1.67)	0.6605	0.896745	119927	997	118930	phecode 288.1	hematopoietic
Neutropenia	OR=1.1 (0.72 to 1.67)	0.6605	0.896745	119927	997	118930	phecode 288.11	hematopoietic
Alcoholism	OR=1.05 (0.85 to 1.3)	0.6626	0.896745	114546	3943	110603	phecode 317.1	mental disorders
Hearing loss	OR=0.93 (0.67 to 1.29)	0.6629	0.896745	121457	1674	119783	phecode 389	sense organs
Neoplasm of uncertain behavior	OR=0.91 (0.6 to 1.38)	0.6675	0.898	109190	1024	108166	phecode 199	neoplasms
Secondary malignancy of respiratory organs	OR=0.91 (0.58 to 1.42)	0.6679	0.898	109023	857	108166	phecode 198.2	neoplasms
Diabetic retinopathy	OR=1.22 (0.48 to 3.12)	0.6709	0.899291	80900	200	80700	phecode 250.7	endocrine metabolic
Atherosclerosis	OR=1.16 (0.58 to 2.34)	0.6756	0.902847	119154	355	118799	phecode 440	circulatory system
Atopicorcontact dermatitis due to other or unspecified	OR=1.11 (0.68 to 1.81)	0.6802	0.906248	120170	722	119448	phecode 939	dermatologic
Secondary malignant neoplasm of liver	OR=1.09 (0.72 to 1.64)	0.686	0.907087	109206	1040	108166	phecode 198.4	neoplasms
Malignant neoplasm of other and ill defined sites within the digestive organs and peritoneum	OR=1.06 (0.8 to 1.4)	0.6869	0.907087	94346	2278	92068	phecode 159	neoplasms
Aphakia and other disorders of lens	OR=1.12 (0.65 to 1.93)	0.687	0.907087	119838	590	119248	phecode 379.3	sense organs
Pain in joint	OR=0.94 (0.71 to 1.25)	0.69	0.908328	121474	2192	119282	phecode 745	musculoskeletal
Hemorrhage or hematoma complicating a procedure	OR=0.93 (0.65 to 1.33)	0.6944	0.908356	115468	1382	114086	phecode 850	injuries and poisonings
Bacterial infection NOS	OR=1.04 (0.84 to 1.3)	0.6954	0.908356	120302	3753	116549	phecode 041	infectious diseases
Left bundle branch block	OR=1.12 (0.63 to 2)	0.6962	0.908356	112085	522	111563	phecode 426.32	circulatory system
Palpitations	OR=0.91 (0.57 to 1.45)	0.7007	0.91153	112363	800	111563	phecode 427.9	circulatory system
Chronic sinusitis	OR=1.09 (0.69 to 1.72)	0.7032	0.912092	115655	842	114813	phecode 475	respiratory
Heart valve replaced	OR=1.12 (0.62 to 2.04)	0.7077	0.915237	117261	485	116776	phecode 395.6	circulatory system
Diseases of hard tissues of teeth	OR=1.08 (0.72 to 1.61)	0.7167	0.923312	119420	1071	118349	phecode 521	digestive
E coli	OR=1.09 (0.68 to 1.76)	0.7201	0.923312	117308	759	116549	phecode 041.4	infectious diseases
Hematemesis	OR=1.1 (0.66 to 1.82)	0.7212	0.923312	114601	677	113924	phecode 578.1	digestive
Atrial fibrillation and flutter	OR=1.03 (0.86 to 1.24)	0.7235	0.923312	117384	5821	111563	phecode 427.2	circulatory system
Benign neoplasm of skin	OR=0.95 (0.72 to 1.26)	0.7263	0.923312	121288	2205	119083	phecode 216	neoplasms
Ischemic Heart Disease	OR=1.03 (0.88 to 1.2)	0.7276	0.923312	121203	8100	113103	phecode 411	circulatory system
Dental caries	OR=1.07 (0.72 to 1.61)	0.7286	0.923312	119406	1057	118349	phecode 521.1	digestive
Enthesopathy	OR=1.05 (0.81 to 1.35)	0.7315	0.924084	114326	2762	111564	phecode 726.1	musculoskeletal
Symptoms involving skin and other integumentary tissue	OR=0.91 (0.54 to 1.55)	0.7334	0.924084	121474	622	120852	phecode 782	symptoms
Malaise and fatigue	OR=0.93 (0.6 to 1.43)	0.7404	0.928093	121474	929	120545	phecode 798	symptoms
Phlebitis and thrombophlebitis of lower extremities	OR=0.94 (0.67 to 1.34)	0.7429	0.928093	111267	1450	109817	phecode 451.2	circulatory system
Cardiac and circulatory congenital anomalies	OR=0.93 (0.6 to 1.44)	0.7439	0.928093	121474	920	120554	phecode 747	congenital anomalies
Calculus of bile duct	OR=0.91 (0.53 to 1.57)	0.745	0.928093	118333	597	117736	phecode 574.2	digestive
Chemotherapy	OR=1.03 (0.85 to 1.25)	0.7483	0.929073	113140	4974	108166	phecode 197	neoplasms
Cardiac arrest and ventricular fibrillation	OR=1.11 (0.6 to 2.05)	0.75	0.929073	112021	458	111563	phecode 427.4	circulatory system
Ulcer of esophagus	OR=1.05 (0.78 to 1.41)	0.7538	0.930498	109763	1999	107764	phecode 530.12	digestive
Symptoms involving nervous and musculoskeletal systems	OR=0.96 (0.72 to 1.27)	0.759	0.930498	121474	2159	119315	phecode 781	symptoms
Cellulitis and abscess of armorhand	OR=0.96 (0.72 to 1.27)	0.7617	0.930498	119519	2182	117337	phecode 681.3	dermatologic
Cellulitis and abscess of foot; toe	OR=0.96 (0.72 to 1.27)	0.7617	0.930498	119519	2182	117337	phecode 681.6	dermatologic
Cellulitis and abscess of leg; except foot	OR=0.96 (0.72 to 1.27)	0.7617	0.930498	119519	2182	117337	phecode 681.5	dermatologic
Hydrocele	OR=1.07 (0.69 to 1.65)	0.7715	0.93349	109742	915	108827	phecode 603.1	genitourinary
Disorders of refraction and accommodation; blindness and low vision	OR=1.06 (0.7 to 1.63)	0.7736	0.93349	121474	969	120505	phecode 367	sense organs
Renal failure NOS	OR=1.09 (0.6 to 2)	0.7737	0.93349	117487	477	117010	phecode 585.2	genitourinary
Angina pectoris	OR=1.03 (0.82 to 1.3)	0.7752	0.93349	116549	3446	113103	phecode 411.3	circulatory system
Superficial injury without mention of infection	OR=1.04 (0.77 to 1.41)	0.7785	0.93349	121281	1939	119342	phecode 915	injuries and poisonings
Calculus of kidney	OR=1.05 (0.74 to 1.5)	0.7807	0.93349	119422	1394	118028	phecode 594.1	genitourinary
Cardiac congenital anomalies	OR=0.94 (0.59 to 1.48)	0.7816	0.93349	121394	840	120554	phecode 747.1	congenital anomalies
Colorectal cancer	OR=1.04 (0.78 to 1.4)	0.7822	0.93349	95259	2071	93188	phecode 153	neoplasms
Osteoarthrosis; localized; primary	OR=1.04 (0.8 to 1.35)	0.7832	0.93349	116206	2531	113675	phecode 740.11	musculoskeletal
Other disorders of biliary tract	OR=1.07 (0.63 to 1.83)	0.791	0.935525	118352	616	117736	phecode 575.8	digestive
Iron deficiency anemias	OR=0.96 (0.72 to 1.29)	0.7914	0.935525	118719	2082	116637	phecode 280	hematopoietic
Iron deficiency anemias; unspecified or not due to blood loss	OR=0.96 (0.72 to 1.29)	0.7914	0.935525	118719	2082	116637	phecode 280.1	hematopoietic
Rheumatoid arthritis	OR=0.94 (0.61 to 1.47)	0.7937	0.935525	121474	889	120585	phecode 714.1	musculoskeletal
Cerebrovascular disease	OR=1.03 (0.8 to 1.34)	0.7987	0.935525	120987	2625	118362	phecode 433	circulatory system
LDL direct	-0.004 (-0.034 to 0.026)	0.801	0.935525	115619	NA	NA	NA	biomarker
Malignant neoplasm of rectum; rectosigmoid junction; and anus	OR=1.05 (0.7 to 1.59)	0.8017	0.935525	94237	1049	93188	phecode 153.3	neoplasms
Aortic valve disease	OR=1.08 (0.6 to 1.94)	0.802	0.935525	117282	506	116776	phecode 394.3	circulatory system
Disorder of skin and subcutaneous tissue NOS	OR=0.96 (0.71 to 1.31)	0.804	0.935525	121474	1860	119614	phecode 689	dermatologic
Fever of unknown origin	OR=1.05 (0.73 to 1.5)	0.8082	0.936028	121474	1328	120146	phecode 783	symptoms
Ganglion and cyst of synovium; tendon; and bursa	OR=1.06 (0.65 to 1.74)	0.8102	0.936028	112269	705	111564	phecode 727.4	musculoskeletal
Senile cataract	OR=1.03 (0.79 to 1.34)	0.8108	0.936028	117981	2597	115384	phecode 366.2	sense organs
Complication due to other implant and internal device	OR=0.95 (0.64 to 1.42)	0.8148	0.93819	115194	1108	114086	phecode 859	injuries and poisonings
Anal and rectal polyp	OR=1.03 (0.8 to 1.31)	0.8236	0.945853	113903	2962	110941	phecode 565.1	digestive
Pulmonary collapse; interstitial and compensatory emphysema	OR=0.95 (0.6 to 1.5)	0.8278	0.947122	117785	847	116938	phecode 508	respiratory
Cancer within the respiratory system	OR=1.04 (0.7 to 1.55)	0.829	0.947122	121462	1136	120326	phecode 165	neoplasms
Skull and face fracture and other intercranial injury	OR=1.04 (0.74 to 1.45)	0.8371	0.949804	121474	1519	119955	phecode 819	injuries and poisonings
Viral infection	OR=1.05 (0.65 to 1.71)	0.8406	0.949804	120536	739	119797	phecode 079	infectious diseases
Aortic aneurysm	OR=1.05 (0.62 to 1.79)	0.8436	0.949804	119425	626	118799	phecode 442.1	circulatory system
Congenital anomalies of great vessels	OR=0.95 (0.55 to 1.64)	0.8438	0.949804	121134	580	120554	phecode 747.13	congenital anomalies
Rheumatoid arthritis and other inflammatory polyarthropathies	OR=0.96 (0.63 to 1.46)	0.8445	0.949804	121474	1004	120470	phecode 714	musculoskeletal
Epistaxis or throat hemorrhage	OR=1.05 (0.66 to 1.67)	0.8466	0.949804	115611	798	114813	phecode 477	respiratory
Abal results of function study of liver	OR=1.04 (0.71 to 1.52)	0.847	0.949804	119455	1196	118259	phecode 573.7	digestive
Respiratory failure	OR=0.96 (0.61 to 1.51)	0.8493	0.949804	117787	849	116938	phecode 509.1	respiratory
Varicose veins of lower extremity	OR=1.03 (0.79 to 1.34)	0.8518	0.949804	112359	2542	109817	phecode 454.1	circulatory system
Urea	0.004 (-0.044 to 0.053)	0.8566	0.949804	115789	NA	NA	NA	biomarker
Emphysema	OR=0.95 (0.58 to 1.58)	0.8577	0.949804	112693	689	112004	phecode 496.1	respiratory
Cancer of bladder	OR=0.97 (0.66 to 1.42)	0.8584	0.949804	120718	1196	119522	phecode 189.2	neoplasms
Other mental disorder	OR=1.01 (0.89 to 1.16)	0.8605	0.949804	119162	11129	108033	phecode 306	mental disorders
Septicemia	OR=0.97 (0.7 to 1.34)	0.8615	0.949804	118221	1672	116549	phecode 038	infectious diseases
Pain in limb	OR=1.03 (0.73 to 1.44)	0.8682	0.951378	121474	1542	119932	phecode 773	symptoms
Streptococcus infection	OR=1.05 (0.61 to 1.81)	0.8682	0.951378	117127	578	116549	phecode 041.2	infectious diseases
Neurological disorders	OR=1.03 (0.75 to 1.41)	0.8694	0.951378	120592	1788	118804	phecode 292	mental disorders
Transient cerebral ischemia	OR=0.96 (0.54 to 1.68)	0.8771	0.957428	118911	549	118362	phecode 433.31	circulatory system
Malignant neoplasm of bladder	OR=1.03 (0.68 to 1.56)	0.883	0.959906	120554	1032	119522	phecode 189.21	neoplasms
Degeneration of intervertebral disc	OR=1.04 (0.65 to 1.66)	0.8847	0.959906	118166	787	117379	phecode 722.6	musculoskeletal
Hyposmolality andoror hyponatremia	OR=0.96 (0.58 to 1.6)	0.8859	0.959906	119460	683	118777	phecode 276.12	endocrine metabolic
Ileostomy status	OR=1.03 (0.62 to 1.73)	0.8968	0.962779	100290	659	99631	phecode 559	digestive
Degenerative disease of the spinal cord	OR=1.03 (0.64 to 1.68)	0.8969	0.962779	115385	740	114645	phecode 334	neurological
Cardiac dysrhythmias	OR=0.99 (0.85 to 1.15)	0.8973	0.962779	120253	8690	111563	phecode 427	circulatory system
Chronic ulcer of skin	OR=0.97 (0.59 to 1.58)	0.8974	0.962779	121474	733	120741	phecode 707	dermatologic
Localized superficial swelling; mass; or lump	OR=1.03 (0.61 to 1.75)	0.9047	0.962779	119881	626	119255	phecode 687.2	dermatologic
Inflammation of the eye	OR=1.03 (0.68 to 1.55)	0.9048	0.962779	119626	1030	118596	phecode 371	sense organs
Diseases of sebaceous glands	OR=0.98 (0.76 to 1.27)	0.9061	0.962779	121235	2681	118554	phecode 706	dermatologic
Cholelithiasis and cholecystitis	OR=1.01 (0.8 to 1.28)	0.9075	0.962779	120996	3260	117736	phecode 574	digestive
Dizziness and giddiness Light headedness and vertigo	OR=0.98 (0.68 to 1.41)	0.9082	0.962779	121043	1290	119753	phecode 386.9	sense organs
Nonrheumatic aortic valve disorders	OR=0.98 (0.63 to 1.51)	0.9161	0.967587	117688	912	116776	phecode 395.2	circulatory system
Other derangement of joint	OR=1.02 (0.65 to 1.61)	0.9192	0.967587	120175	850	119325	phecode 742.9	musculoskeletal
Other acquired deformities of limbs	OR=1.03 (0.61 to 1.73)	0.9216	0.967587	119843	631	119212	phecode 736	musculoskeletal
Pleurisy; pleural effusion	OR=0.99 (0.76 to 1.29)	0.9223	0.967587	119435	2497	116938	phecode 507	respiratory
Hereditary retinal dystrophies	OR=1.04 (0.43 to 2.5)	0.9246	0.967587	80929	229	80700	phecode 362.7	sense organs
Disorders of fluid; electrolyte; and acid base balance	OR=1.01 (0.78 to 1.31)	0.9259	0.967587	121474	2697	118777	phecode 276	endocrine metabolic
Sebaceous cyst	OR=0.99 (0.76 to 1.28)	0.9344	0.974162	121216	2662	118554	phecode 706.2	dermatologic
Coronary atherosclerosis	OR=1.01 (0.84 to 1.21)	0.9423	0.980081	118697	5594	113103	phecode 411.4	circulatory system
Cystitis	OR=1.01 (0.61 to 1.69)	0.9548	0.985891	113538	674	112864	phecode 592.1	genitourinary
Sepsis	OR=0.99 (0.68 to 1.44)	0.9586	0.985891	121474	1230	120244	phecode 994.2	injuries and poisonings
Sepsis and SIRS	OR=0.99 (0.68 to 1.44)	0.9586	0.985891	121474	1230	120244	phecode 994	injuries and poisonings
Other disorders of testis	OR=0.99 (0.7 to 1.4)	0.9594	0.985891	110301	1474	108827	phecode 603	genitourinary
Symptoms and disorders of the joints	OR=1.01 (0.69 to 1.47)	0.9609	0.985891	120544	1219	119325	phecode 741	musculoskeletal
Benign neoplasm of unspecified sites	OR=0.99 (0.6 to 1.62)	0.9613	0.985891	121474	703	120771	phecode 229	neoplasms
Abdominal aortic aneurysm	OR=0.98 (0.49 to 1.99)	0.9654	0.987799	119155	356	118799	phecode 442.11	circulatory system
Inflammatory bowel disease and other gastroenteritis and colitis	OR=0.99 (0.71 to 1.39)	0.9706	0.990821	101189	1558	99631	phecode 555	digestive
Acute upper respiratory infections of multiple or unspecified sites	OR=1.01 (0.6 to 1.71)	0.9761	0.992503	121428	625	120803	phecode 465	respiratory
Calculus of ureter	OR=1.01 (0.68 to 1.49)	0.9783	0.992503	119165	1137	118028	phecode 594.3	genitourinary
Other aneurysm	OR=1.01 (0.62 to 1.62)	0.979	0.992503	119566	767	118799	phecode 442	circulatory system
Other disorders of male genital organs	OR=1 (0.73 to 1.35)	0.9838	0.994555	110693	1866	108827	phecode 608	genitourinary
Other disorders of liver	OR=1 (0.77 to 1.29)	0.9902	0.994555	121011	2752	118259	phecode 573	digestive
Syncope and collapse	OR=1 (0.79 to 1.27)	0.9906	0.994555	121474	3064	118410	phecode 788	symptoms
Derangement of joint; non traumatic	OR=1 (0.66 to 1.52)	0.9923	0.994555	120336	1011	119325	phecode 742	musculoskeletal
Urinary calculus	OR=1 (0.78 to 1.28)	0.9923	0.994555	120952	2924	118028	phecode 594	genitourinary
Cancer of bronchus; lung	OR=1 (0.65 to 1.54)	0.9946	0.9946	121260	934	120326	phecode 165.1	neoplasms
Other disorders of male genital organs	OR=1 (0.73 to 1.35)	0.9838	0.994525	110693	1866	108827	phecode 608	genitourinary
Other disorders of liver	OR=1 (0.77 to 1.29)	0.9902	0.994525	121011	2752	118259	phecode 573	digestive
Syncope and collapse	OR=1 (0.79 to 1.27)	0.9906	0.994525	121474	3064	118410	phecode 788	symptoms
Derangement of joint; non traumatic	OR=1 (0.66 to 1.52)	0.9923	0.994525	120336	1011	119325	phecode 742	musculoskeletal
Urinary calculus	OR=1 (0.78 to 1.28)	0.9923	0.994525	120952	2924	118028	phecode 594	genitourinary
Cancer of bronchus; lung	OR=1 (0.65 to 1.54)	0.9946	0.9946	121260	934	120326	phecode 165.1	neoplasms

## Sheet: Table 8
Supplementary File 1 - Table 10. Independent genetic variants associated with total testosterone at genome-wide significance (p<5x10-8) and not associated with sex hormone-binding globulin in 175,421 males from UK Biobank
chr	rsid	position (hg19)	beta	se	effect allele	other allele	eaf	pval	gene	sample size
1	rs12035604	66056052	-0.0770795	0.0140332	T	C	0.742676	4e-08	LEPR	175421
1	rs537115525	155572575	-0.147681	0.0267683	T	C	0.944623	3.4e-08	ASH1L-AS1;MSTO1	175421
1	rs34702488	163256609	-0.0890732	0.0161147	T	A	0.825062	3.2e-08	RGS5	175421
1	rs537444	172134469	0.071006	0.0123381	C	G	0.578619	8.7e-09	DNM3	175421
1	rs35737316	204161534	-0.136657	0.014174	C	T	0.754228	5.3e-22	KISS1	175421
2	rs72862643	31533151	-0.250345	0.0251768	T	C	0.93657	2.7e-23	EHD3;XDH	175421
2	rs11124268	31951731	-0.100441	0.0156341	C	A	0.811265	1.3e-10	SRD5A2;LINC01946	175421
2	rs11901448	32096569	-0.106499	0.0132242	C	T	0.443892	8.1e-16	MEMO1	175421
2	rs112564689	33377229	-0.308863	0.0378265	C	G	0.971641	3.2e-16	LTBP1	175421
2	rs10192634	180500950	-0.0795785	0.013731	C	T	0.730445	6.8e-09	ZNF385B	175421
2	rs12468274	234627914	0.192648	0.0280561	T	C	0.950171	6.6e-12	UGT1A4	175421
3	rs6785560	88269441	0.103108	0.0167817	G	A	0.155456	8e-10	C3orf38;EPHA3	175421
3	rs7626226	138234576	0.08502	0.0121906	C	T	0.532313	3.1e-12	CEP70	175421
3	rs79223973	151992162	-0.120625	0.0203333	A	C	0.899643	3e-09	MBNL1	175421
4	rs7679843	22028079	-0.154764	0.0213229	C	G	0.90528	3.9e-13	KCNIP4;LOC100505912	175421
4	rs115872353	103983087	0.276711	0.0435092	T	G	0.98021	2e-10	SLC9B2	175421
4	rs17289915	104491078	0.485116	0.0546601	C	G	0.987482	7e-19	LINC02428;TACR3	175421
4	rs565931739	104590005	0.154895	0.016759	C	CA	0.835655	2.4e-20	TACR3	175421
5	rs1979835	135689839	0.109539	0.017625	G	A	0.861839	5.1e-10	TRPC7	175421
6	rs7758796	100105028	-0.0876982	0.0122873	G	A	0.547445	9.5e-13	PRDM13;MCHR2	175421
6	rs6902789	105358192	0.116201	0.0126309	G	A	0.63027	3.6e-20	HACE1;LIN28B-AS1	175421
6	rs7755185	152339615	0.0723236	0.0131433	A	G	0.689303	3.7e-08	ESR1	175421
7	rs9986829	15019259	-0.145694	0.0121984	G	A	0.494177	7e-33	DGKB;AGMO	175421
7	rs10279715	40870935	0.0733907	0.0122337	A	G	0.538627	2e-09	SUGCT	175421
7	rs10229569	99183704	-0.0929737	0.0166022	G	A	0.839746	2.1e-08	ZNF655;TMEM225B	175421
8	rs7835492	21089517	-0.0961586	0.0172125	T	C	0.853239	2.3e-08	LINC02153;LOC101929172	175421
8	rs35006173	77911193	0.0843422	0.0127398	A	AT	0.610529	3.6e-11	PEX2	175421
9	rs2090409	108967088	0.0952997	0.0131288	C	A	0.683892	3.9e-13	TMEM38B;MIR8081	175421
10	rs571568325	67293894	-0.173825	0.012377	G	GA	0.595379	8.4e-45	LOC101928887;LINC01515	175421
11	rs76160029	28884695	0.24764	0.0365509	G	A	0.971471	1.2e-11	MIR8068;LINC01616	175421
11	rs7478970	29118542	-0.108361	0.0147873	G	A	0.782204	2.3e-13	MIR8068;LINC01616	175421
11	rs2933170	29135383	0.0793216	0.0137195	A	G	0.729219	7.4e-09	MIR8068;LINC01616	175421
11	rs35934227	29458062	0.279518	0.0446052	C	T	0.98098	3.7e-10	MIR8068;LINC01616	175421
11	rs12796488	94131557	0.16031	0.0158818	C	A	0.822692	5.9e-24	GPR83	175421
11	rs34669210	122772285	-0.109145	0.0124044	T	TA	0.432845	1.4e-18	C11orf63	175421
11	rs7107502	122830214	0.0709324	0.0122846	G	A	0.431101	7.7e-09	C11orf63	175421
11	rs634554	125070392	0.0762317	0.0132121	C	A	0.307732	7.9e-09	PKNOX2	175421
12	rs7959682	2944356	-0.0850491	0.0149759	T	A	0.529185	1.4e-08	NRIP2	175421
12	rs11835185	3057794	-0.134805	0.0152671	C	T	0.800787	1e-18	TULP3;TEAD4	175421
12	rs12318430	3115206	-0.347305	0.0313784	C	A	0.960689	1.8e-28	TEAD4	175421
12	rs12810788	116196322	0.0998375	0.0154787	G	A	0.201029	1.1e-10	TBX3;MED13L	175421
12	rs6486542	130952209	0.0737928	0.0123573	C	T	0.57142	2.3e-09	RIMBP2	175421
13	rs12429920	112720354	-0.070481	0.0121757	G	A	0.524458	7.1e-09	LINC00403	175421
14	rs1812755	90007637	0.0942748	0.0153903	T	C	0.800435	9e-10	FOXN3	175421
15	rs28892005	51519945	0.10127	0.0127394	A	AAAG	0.350316	1.9e-15	MIR4713HG	175421
15	rs17238845	56936160	-0.0677964	0.0123946	A	G	0.405972	4.5e-08	ZNF280D	175421
16	rs2764772	20060653	-0.12193	0.0129064	T	A	0.666238	3.5e-21	GPR139	175421
16	rs2077412	28621311	0.096475	0.0142089	T	C	0.300674	1.1e-11	SULT1A1	175421
17	rs2696641	43651550	-0.0762573	0.0137	G	C	0.475281	2.6e-08	LRRC37A4P;MAPK8IP1P2	175421
18	rs2684837	44749884	0.0852458	0.0122749	A	C	0.558512	3.8e-12	SKOR2	175421
19	rs142936065	48449301	-0.0726099	0.0130146	G	GTT	0.48274	2.4e-08	SNAR-A12;SNAR-C3	175421
22	rs11703376	49678713	-0.121625	0.013768	C	T	0.730975	1e-18	LINC01310;NONE	175421
Effect size (beta and standard error) in nmol/L of calculated free testosterone per copy of effect allele
Abbreviations: Chr, chromosome; rsID, rs identifier; SE, standard error; eaf, effect allele frequency; pval, p-value

## Sheet: Table 9
Supplementary File 1 - Table 11. All Mendelian randomization analyses of total testosterone on 22 a priori outcomes.
	IVW		Egger			MR-RAPS		MR-PRESSO
Outcome	Effect per 1 nmol/L increase in total testosterone (95% CI)	P-value	P-value for Egger intercept	Effect per 1 nmol/L increase in total testosterone (95% CI)	P-value	Effect per 1 nmol/L increase in total testosterone (95% CI)	P-value	Global Test P-value	Effect per 1 nmol/L increase in total testosterone (95% CI)	P-value	Distortion Test P-value	Sample Size (Cases/Controls)
Haematocrit percentage	0.256 % (0.193 to 0.319)	1.86669e-15	0.1098	0.127 % (-0.04 to 0.294)	0.140543	0.232 % (0.158 to 0.306)	9.75888e-10	<0.0001	0.2612 % (0.211 to 0.312)	3.168e-13	0.81	152872
Body fat-free percentage	0.408 % (0.3 to 0.516)	1.65935e-13	0.5648	0.327 % (0.034 to 0.62)	0.0331483	0.447 % (0.322 to 0.572)	2.192e-12	<0.0001	0.4155 % (0.313 to 0.518)	2.581e-10	0.8856	154254
Body fat percentage	-0.395 % (-0.503 to -0.287)	7.59171e-13	0.542	-0.31 % (-0.602 to -0.018)	0.0422776	-0.426 % (-0.551 to -0.301)	2.3585e-11	<0.0001	-0.3764 % (-0.473 to -0.28)	8.324e-10	0.7025	153772
Benign prostatic hyperplasia	OR = 1.09 (1.04 to 1.14)	0.000357254	0.4855	OR = 1.04 (0.92 to 1.18)	0.505279	OR = 1.10 (1.05 to 1.15)	0.000125928	0.1086	NA	NA	NA	10894/146316
Heel bone mineral density T-score	0.0666 SD (0.028 to 0.105)	0.000710651	0.2297	0.126 SD (0.023 to 0.229)	0.0203468	0.08 SD (0.051 to 0.109)	6.67675e-08	<0.0001	0.0943 SD (0.071 to 0.118)	3.757e-10	0.1483	90676
Hemoglobin A1c	-0.17 mmol/L (-0.274 to -0.066)	0.00126528	0.3884	-0.0555 mmol/L (-0.334 to 0.223)	0.698063	-0.124 mmol/L (-0.215 to -0.033)	0.00784602	<0.0001	-0.1063 mmol/L (-0.19 to -0.023)	0.01612	0.036	149828
Glucose	-0.0256 mmol/L (-0.045 to -0.006)	0.00898717	0.8464	-0.0208 mmol/L (-0.073 to 0.031)	0.437339	-0.015 mmol/L (-0.03 to 0)	0.0513894	<0.0001	-0.01373 mmol/L (-0.027 to 0)	0.04776	0.0244	138307
Depression	OR = 1.08 (1.02 to 1.15)	0.0144523	0.8242	OR = 1.06 (0.9 to 1.26)	0.484788	OR = 1.08 (1.01 to 1.16)	0.0172338	0.8715	NA	NA	NA	4725/152485
Accelerometer-based physical activity	0.266 milligravity (0.042 to 0.49)	0.0200765	0.5044	0.0736 milligravity (-0.532 to 0.679)	0.812484	0.276 milligravity (0.053 to 0.499)	0.0151426	0.1331	NA	NA	NA	30439
Prostate cancer	OR = 1.07 (1.01 to 1.13)	0.0290765	0.9119	OR = 1.06 (0.9 to 1.24)	0.486021	OR = 1.06 (1 to 1.13)	0.0478562	0.0213	NA	NA	NA	7586/149624
Androgenic alopecia	OR = 1.06 (1 to 1.13)	0.0511933	0.6829	OR = 1.03 (0.87 to 1.21)	0.735903	OR = 1.08 (0.99 to 1.17)	0.0743794	<0.0001	OR = 1.12 (1.08 to 1.15)	1.463e-08	0.2131	70283/85756
Type 2 diabetes	OR = 0.97 (0.91 to 1.02)	0.200358	0.4113	OR = 1.02 (0.88 to 1.18)	0.770498	OR = 0.98 (0.92 to 1.03)	0.388794	0.0011	OR = 0.98 (0.94 to 1.03)	0.5362	0.2032	11079/146131
Myocardial infarction	OR = 1.02 (0.98 to 1.08)	0.320474	0.9704	OR = 1.02 (0.9 to 1.16)	0.741389	OR = 1.03 (0.98 to 1.09)	0.225684	0.2035	NA	NA	NA	9398/147812
Venous thromboembolism	OR = 1.02 (0.95 to 1.09)	0.603605	0.07804	OR = 0.87 (0.73 to 1.05)	0.14616	OR = 1.02 (0.95 to 1.09)	0.652165	0.6821	NA	NA	NA	4127/153083
All fracture	OR = 0.99 (0.94 to 1.04)	0.611087	0.535	OR = 0.95 (0.82 to 1.09)	0.446041	OR = 0.99 (0.93 to 1.05)	0.754655	0.0427	NA	NA	NA	9133/148077
Handgrip strength	0.0306 kg (-0.105 to 0.166)	0.656869	0.6104	-0.0581 kg (-0.424 to 0.307)	0.756687	0.029 kg (-0.102 to 0.16)	0.666002	<0.0001	-0.009878 kg (-0.132 to 0.112)	0.8744	0.0892	156400
Ischemic stroke	OR = 1.02 (0.93 to 1.12)	0.663184	0.3699	OR = 0.92 (0.72 to 1.18)	0.501252	OR = 1.01 (0.92 to 1.12)	0.769223	0.9149	NA	NA	NA	2122/155088
Diastolic blood pressure	0.0187 mmHg (-0.114 to 0.151)	0.78205	0.8663	0.0475 mmHg (-0.312 to 0.407)	0.796628	0.023 mmHg (-0.114 to 0.159)	0.746304	0.0164	0.03997 mmHg (-0.084 to 0.164)	0.5304	0.8204	148384
All stroke	OR = 1.01 (0.95 to 1.07)	0.811774	0.693	OR = 0.98 (0.82 to 1.16)	0.780757	OR = 1.01 (0.95 to 1.08)	0.683024	0.7977	NA	NA	NA	4569/152641
Heart failure	OR = 1 (0.93 to 1.07)	0.893615	0.4883	OR = 0.94 (0.78 to 1.13)	0.488738	OR = 0.99 (0.91 to 1.06)	0.712149	0.2288	NA	NA	NA	4288/152922
All dementia	OR = 1.01 (0.86 to 1.17)	0.936995	0.427	OR = 0.86 (0.57 to 1.3)	0.478622	OR = 0.97 (0.84 to 1.13)	0.693392	0.085	NA	NA	NA	1003/156207
Systolic blood pressure	-0.0105 mmHg (-0.271 to 0.25)	0.93718	0.1002	0.534 mmHG (-0.152 to 1.22)	0.133639	0.087 mmHg (-0.173 to 0.347)	0.510071	<0.0001	0.06339 mmHg (-0.164 to 0.29)	0.5866	0.2225	148383
Bolded rows are significant adjusting for multiple hypothesis testing using Bonferroni correction

[truncated: 4 more sheets: Table 10, Table 11, Table 12, Fig1]
